# Supplementary material
Source: Royal Society of Chemistry journal article supplement (doi:10.1039/d6dt00709k)
Supplement: d6dt00709k1.pdf [file d6dt00709k1.pdf]

## Supplementary Information

### Steric tuning of OH-functionalised *N,N*-manganese(I) complexes for the transfer hydrogenation of carbonyl compounds

Samuel J. Prettyman,<sup>a</sup> Saad Alqahtani,<sup>b</sup> Mona H. Alhalafi,<sup>a,c</sup> Kuldip Singh<sup>a</sup>

and Gregory A. Solan\*<sup>a</sup>

<sup>a</sup> *School of Chemistry, University of Leicester, University Road, Leicester, LE17RH, United Kingdom*

<sup>b</sup> *Department of Chemistry, College of Science, King Saud University, Ryaidh 11451, Saudi Arabia.*

<sup>c</sup> *Department of Chemistry, College of Science, Majmaah University, 11952, Saudi Arabia.*

| Contents                                                                                                    | Page      |
|-------------------------------------------------------------------------------------------------------------|-----------|
| 1. <sup>1</sup> H NMR and <sup>13</sup> C NMR spectra of starting materials and <b>HL1a</b> – <b>HL1e</b>   | S2 – S7   |
| 2. <sup>1</sup> H NMR and <sup>13</sup> C NMR spectra of complexes <b>Mn1a</b> – <b>Mn1e</b> and <b>Mn2</b> | S8 – S14  |
| 3. IR spectra of starting materials and <b>HL1a</b> – <b>HL1e</b>                                           | S14 – S18 |
| 4. IR spectra of complexes <b>Mn1a</b> – <b>Mn1e</b> and <b>Mn2</b>                                         | S19 – S22 |
| 5. Catalytic evaluation for transfer hydrogenation                                                          | S23 – S32 |
| 6. SambVca Buried Volume Calculations (%V <sub>bur</sub> )                                                  | S33 – S35 |
| 7. Crystallographic studies                                                                                 | S36 – S42 |
| 8. Computational methods                                                                                    | S43 – S79 |
| 9. References                                                                                               | S80       |

## 1. $^1\text{H}$ NMR and $^{13}\text{C}$ NMR spectra of starting materials and HL1a – HL1e

All NMR spectra ( $^1\text{H}$ ,  $^{13}\text{C}$ ) of the organic compounds were recorded on a Bruker Avance III 500 MHz spectrometer with a 5 mm BBO probe, Bruker Avance III HD 400 MHz spectrometer with a 5 mm BBO probe and a Bruker Avance NEO 500 MHz spectrometer with either a 5 mm Prodigy BBO cryoprobe or a 5 mm BBFO probe. All deuterated solvents were purchased from Goss Scientific and Sigma-Aldrich.

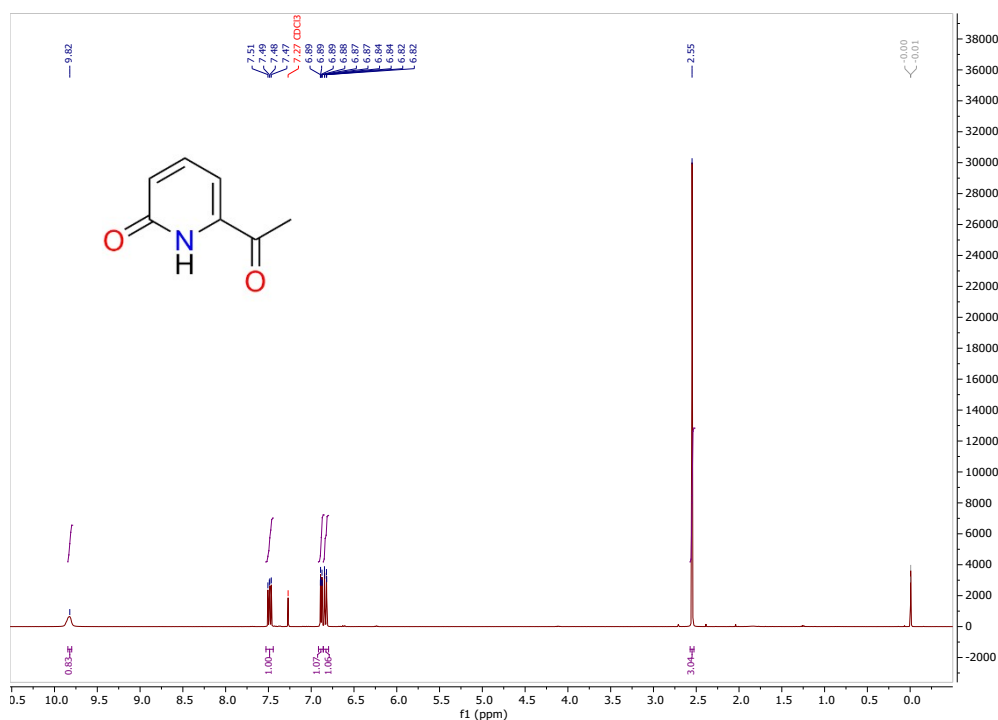

**Figure S1**  $^1\text{H}$  NMR spectrum of 6-acetylpyrid-2-one; recorded in  $\text{CDCl}_3$  at ambient temperature

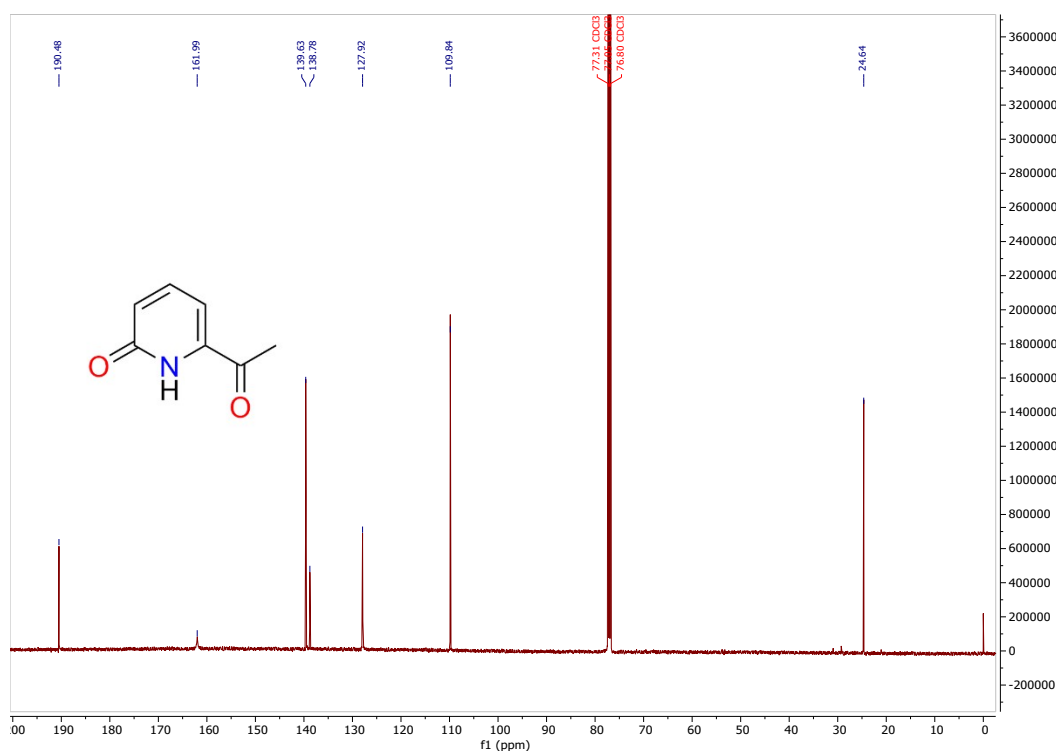

**Figure S2**  $^{13}\text{C}\{^1\text{H}\}$  NMR spectrum of 6-acetylpyrid-2-one; recorded in  $\text{CDCl}_3$  at ambient temperature

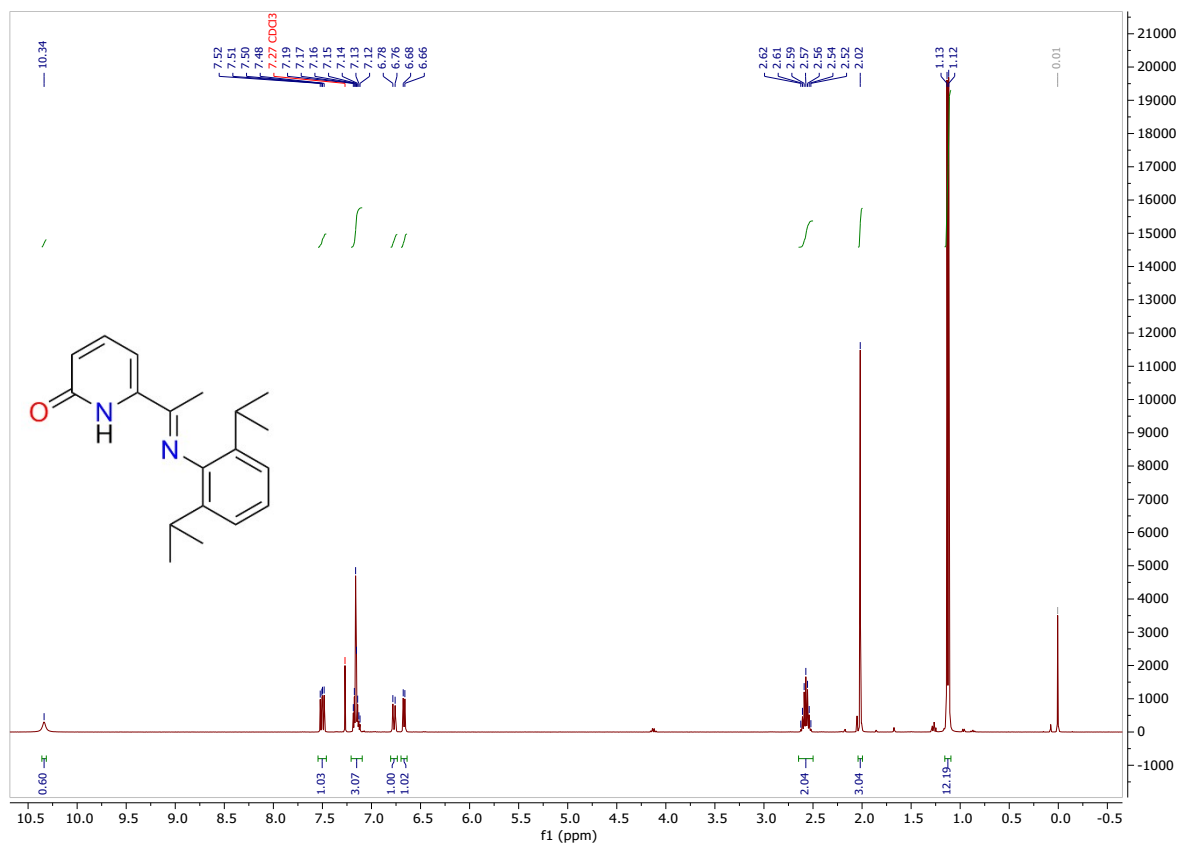

**Figure S3**  $^1\text{H}$  NMR spectrum of HL1a; recorded in  $\text{CDCl}_3$  at ambient temperature

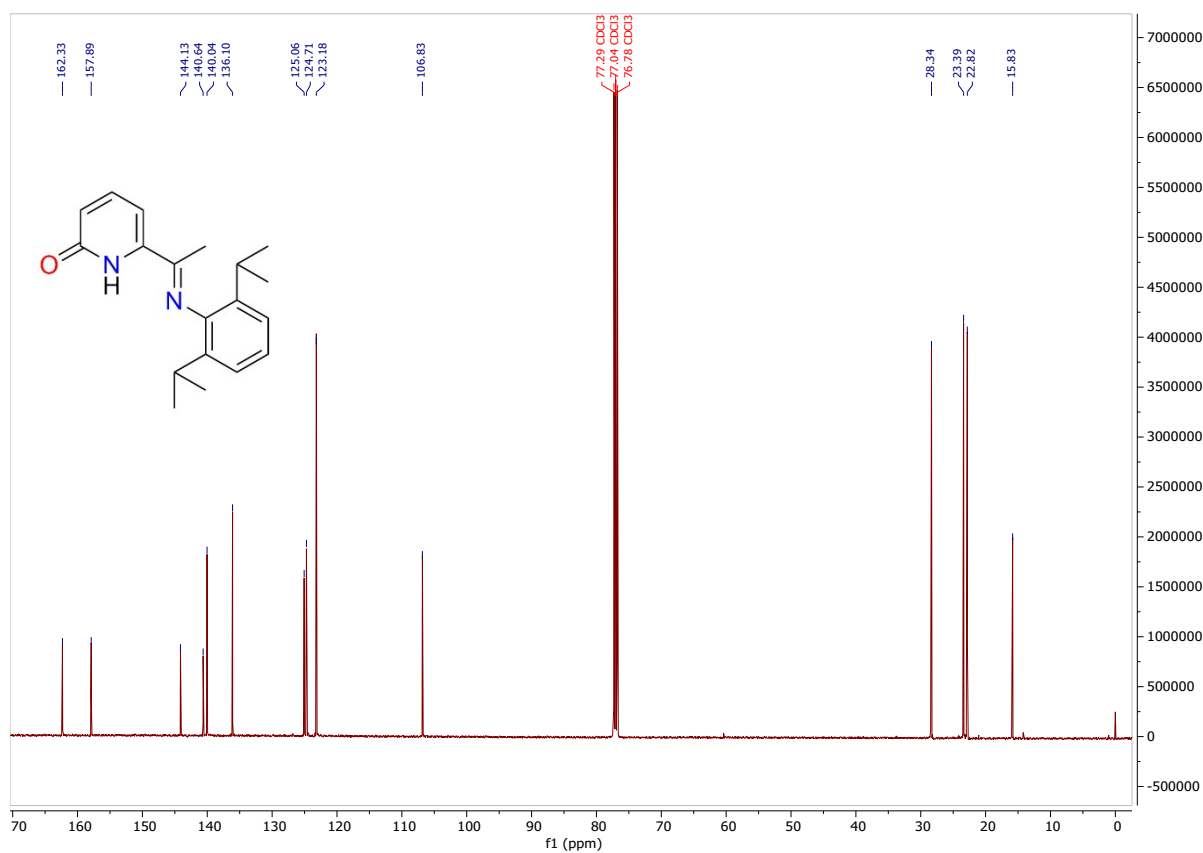

**Figure S4**  $^{13}\text{C}\{^1\text{H}\}$  NMR spectrum of HL1a; recorded in  $\text{CDCl}_3$  at ambient temperature

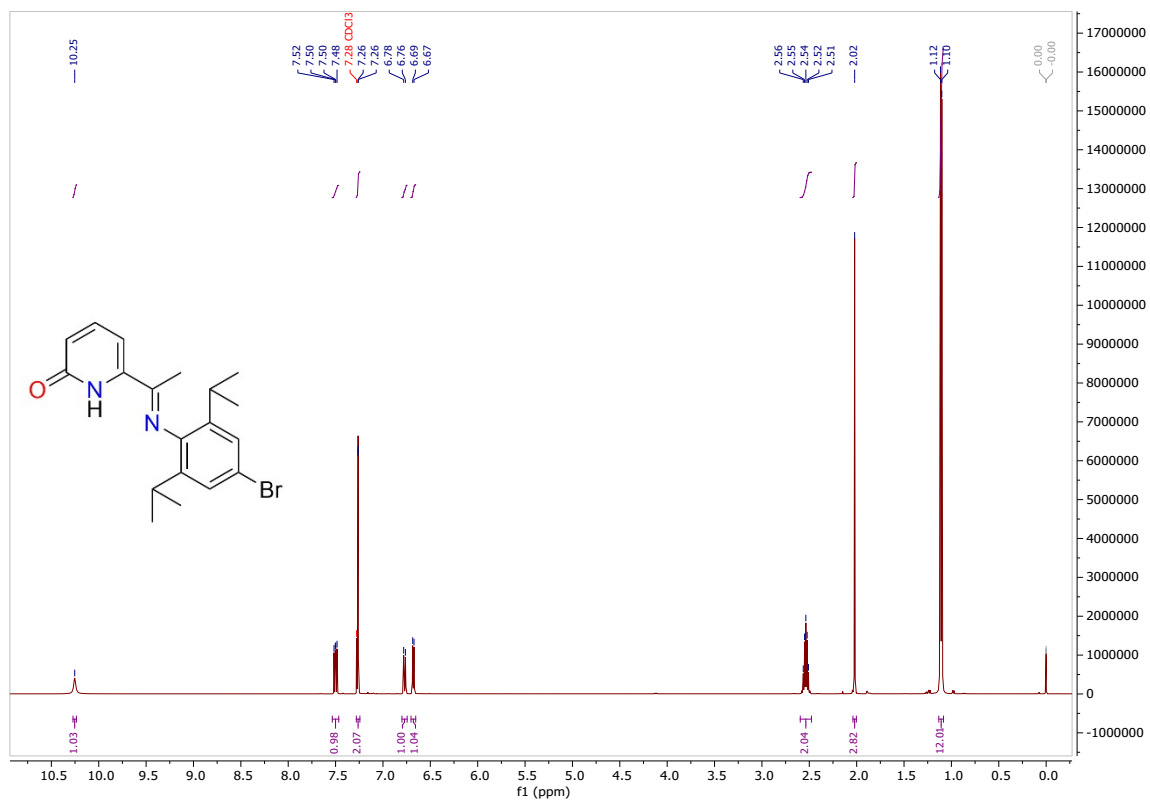

**Figure S5**  $^1\text{H}$  NMR spectrum of HL1b; recorded in  $\text{CDCl}_3$  at ambient temperature

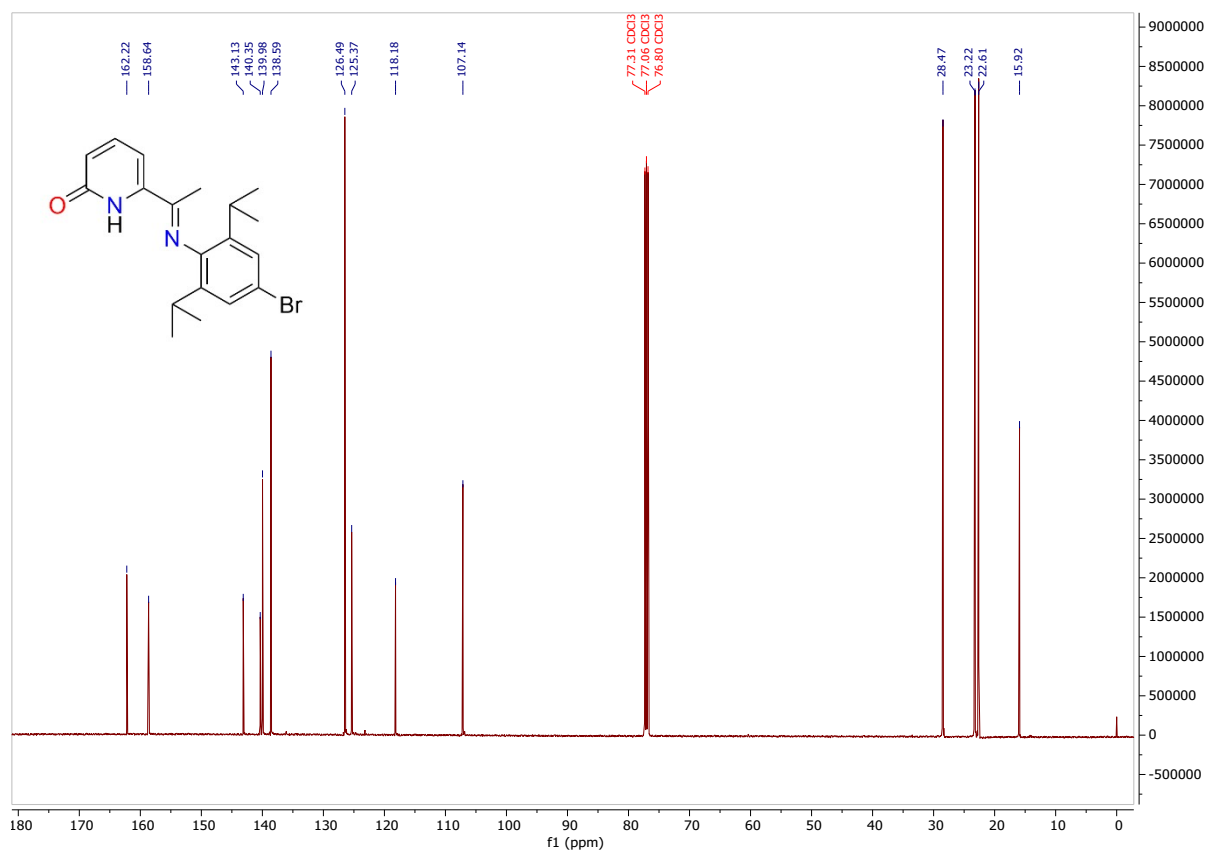

**Figure S6**  $^{13}\text{C}\{^1\text{H}\}$  NMR spectrum of HL1b; recorded in  $\text{CDCl}_3$  at ambient temperature

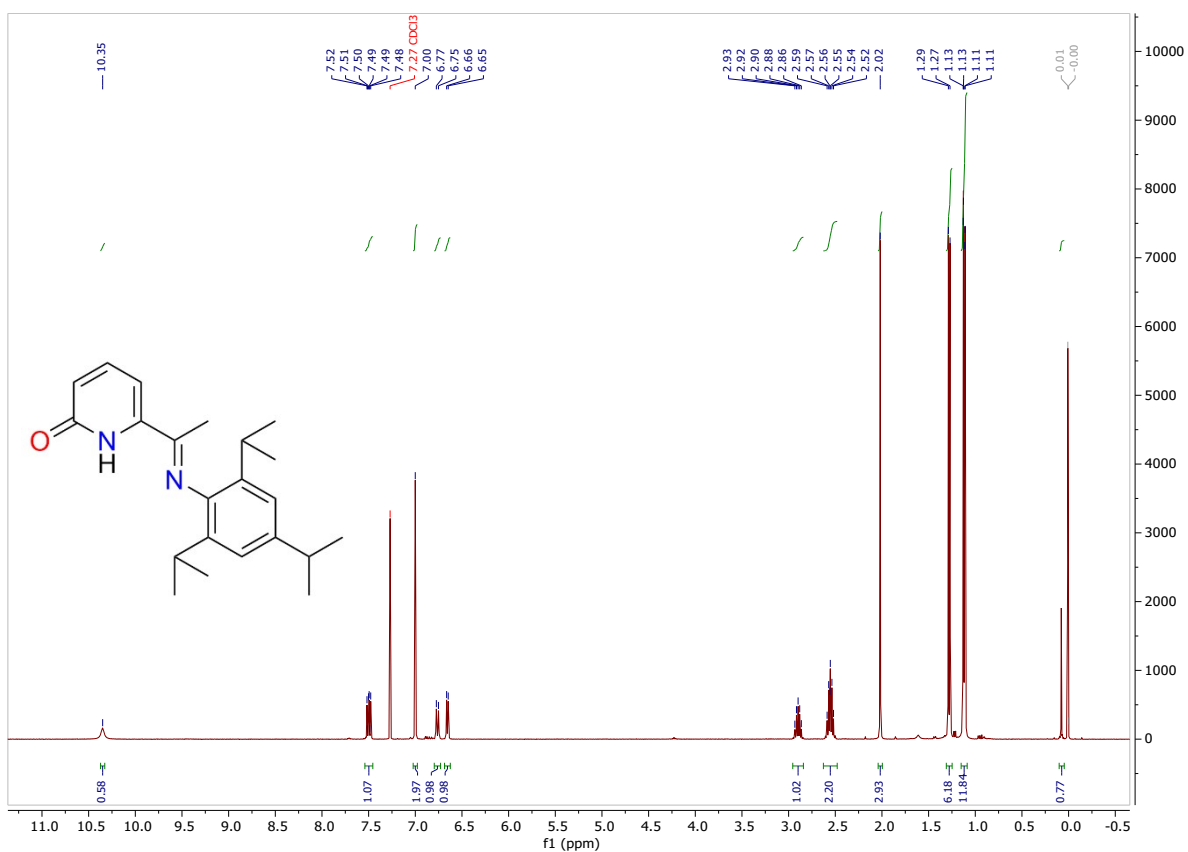

Figure S7  $^1\text{H}$  NMR spectrum of HL1c; recorded in  $\text{CDCl}_3$  at ambient temperature

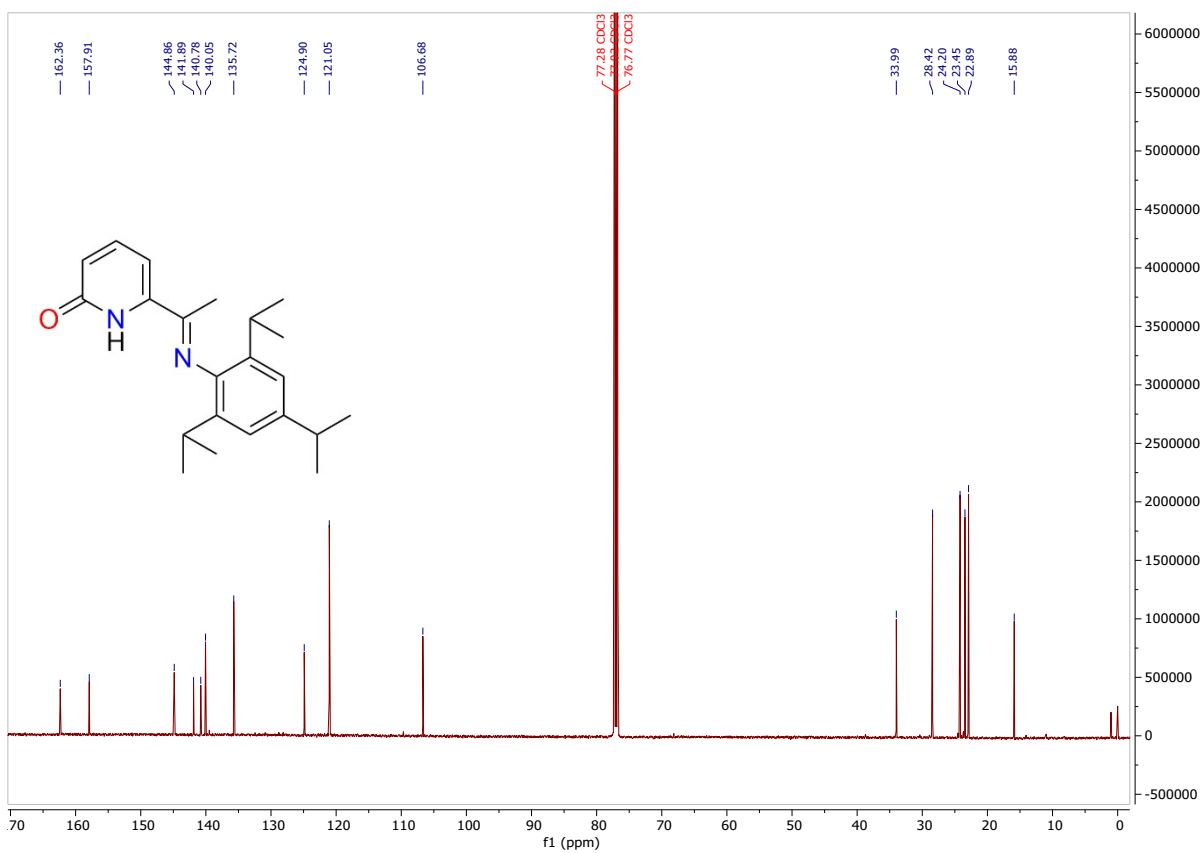

Figure S8  $^{13}\text{C}\{^1\text{H}\}$  NMR spectrum of HL1c; recorded in  $\text{CDCl}_3$  at ambient temperature

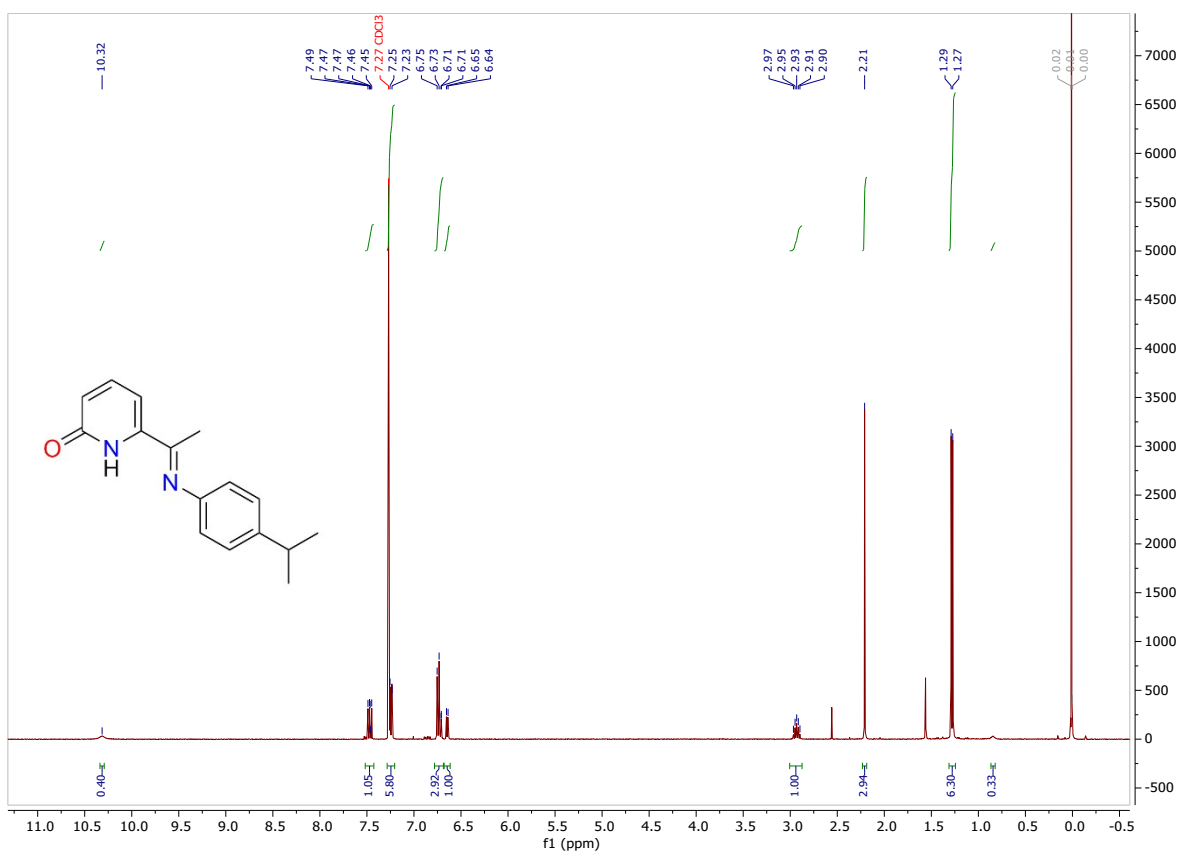

Figure S9  $^1\text{H}$  NMR spectrum of HL1d; recorded in  $\text{CDCl}_3$  at ambient temperature

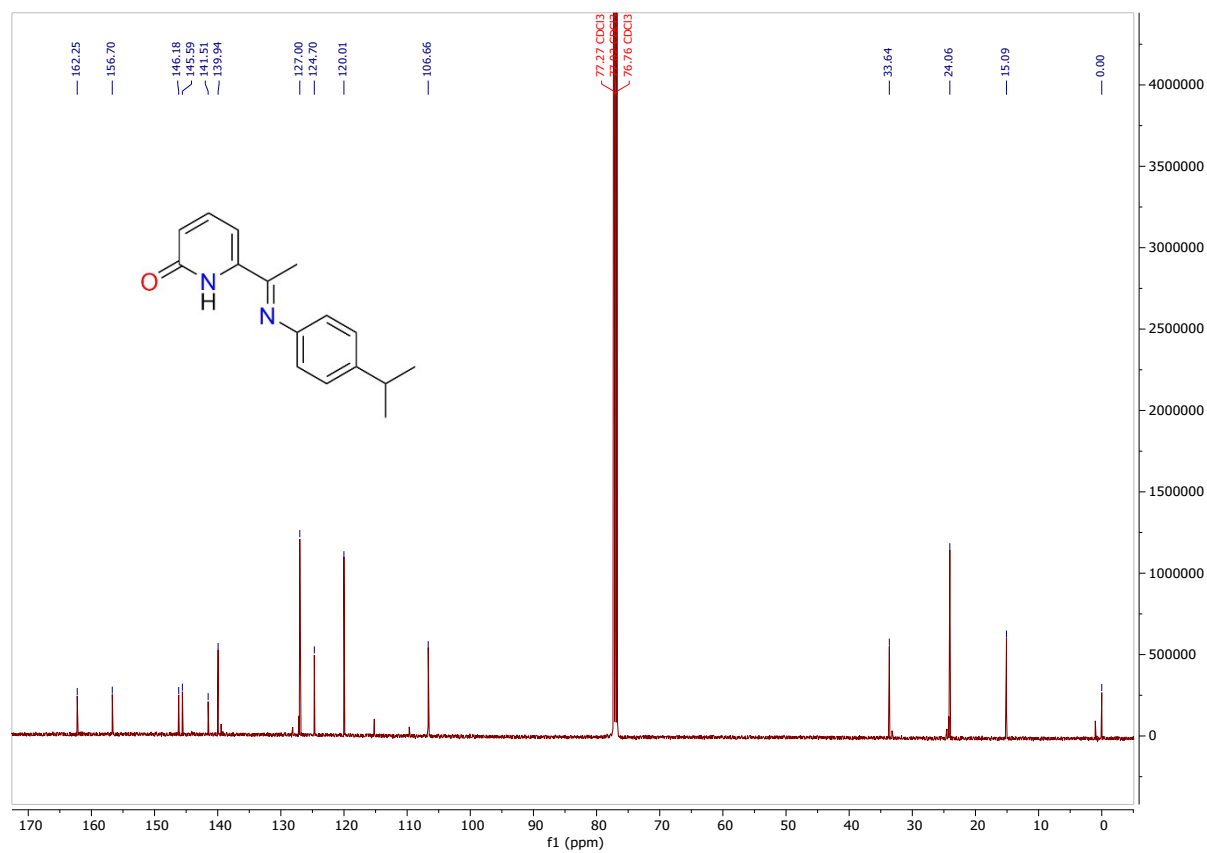

Figure S10  $^{13}\text{C}\{^1\text{H}\}$  NMR spectrum of HL1d; recorded in  $\text{CDCl}_3$  at ambient temperature

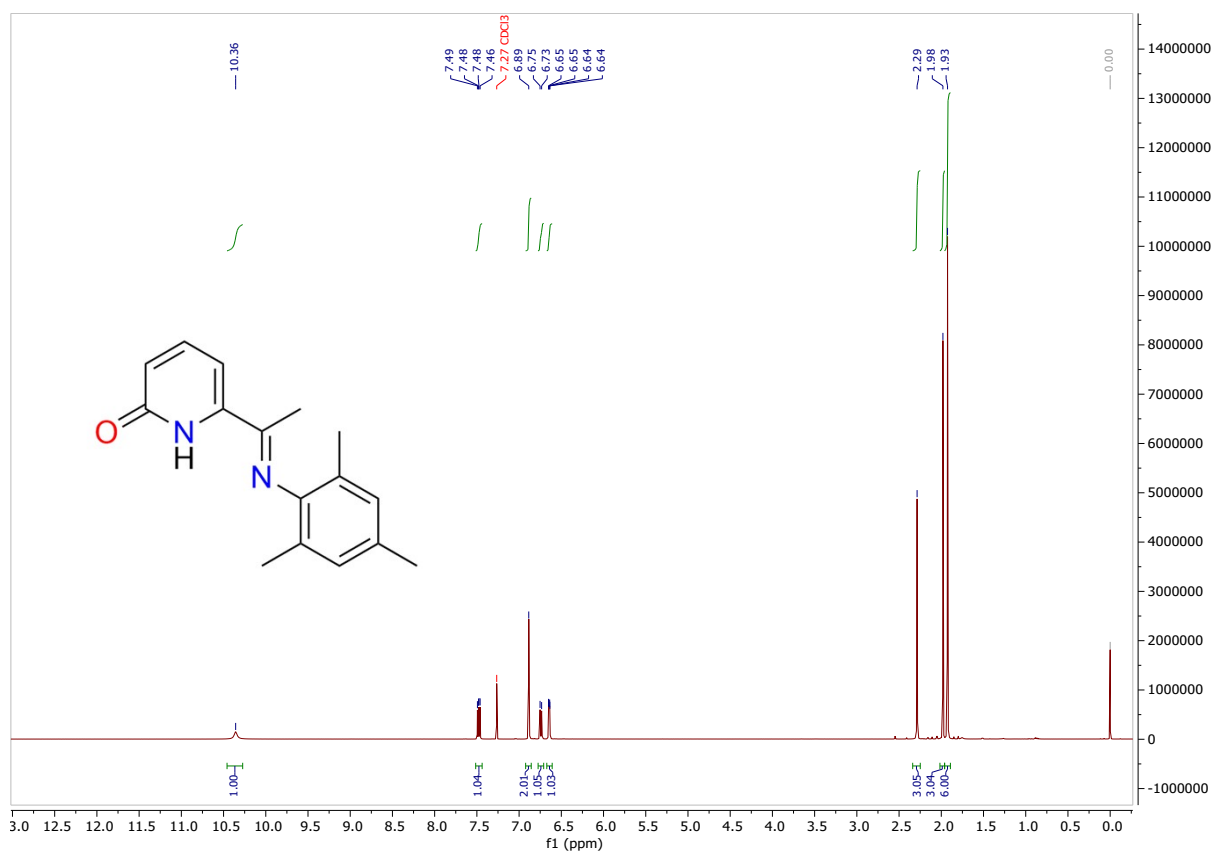

**Figure S11**  $^1\text{H}$  NMR spectrum of HL1e; recorded in  $\text{CDCl}_3$  at ambient temperature

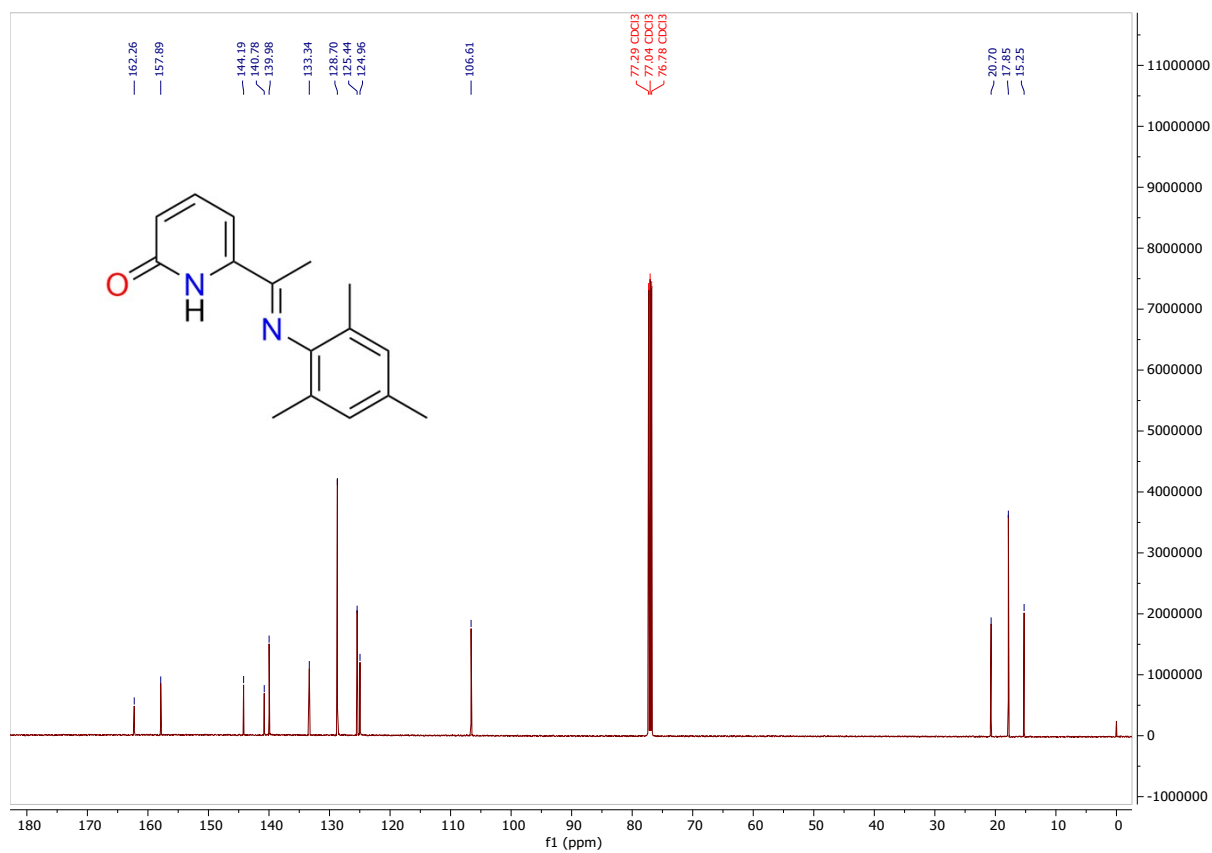

**Figure S12**  $^{13}\text{C}\{^1\text{H}\}$  NMR spectrum of HL1e; recorded in  $\text{CDCl}_3$  at ambient temperature

## 2. $^1\text{H}$ NMR and $^{13}\text{C}$ NMR spectra of complexes Mn1a – Mn1e and Mn2

All NMR spectra ( $^1\text{H}$ ,  $^{13}\text{C}$ ) of the metal complexes were recorded on a Bruker Avance III 500 MHz spectrometer with a 5 mm BBO probe, Bruker Avance III HD 400 MHz spectrometer with a 5 mm BBO probe and a Bruker Avance NEO 500 MHz spectrometer with either a 5 mm Prodigy BBO cryoprobe or a 5 mm BBFO probe. All deuterated solvents were purchased from Goss Scientific and Sigma-Aldrich.

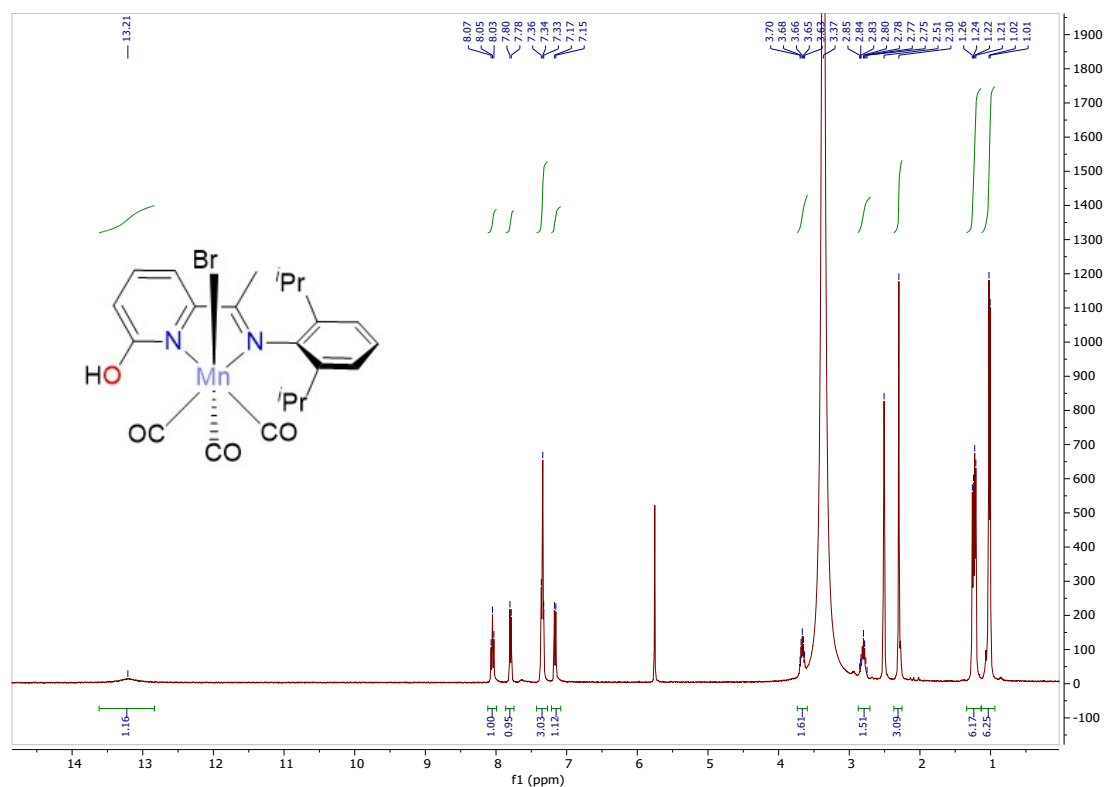

**Figure S13**  $^1\text{H}$  NMR spectrum of Mn1a; recorded in  $\text{DMSO-}d_6$  at ambient temperature

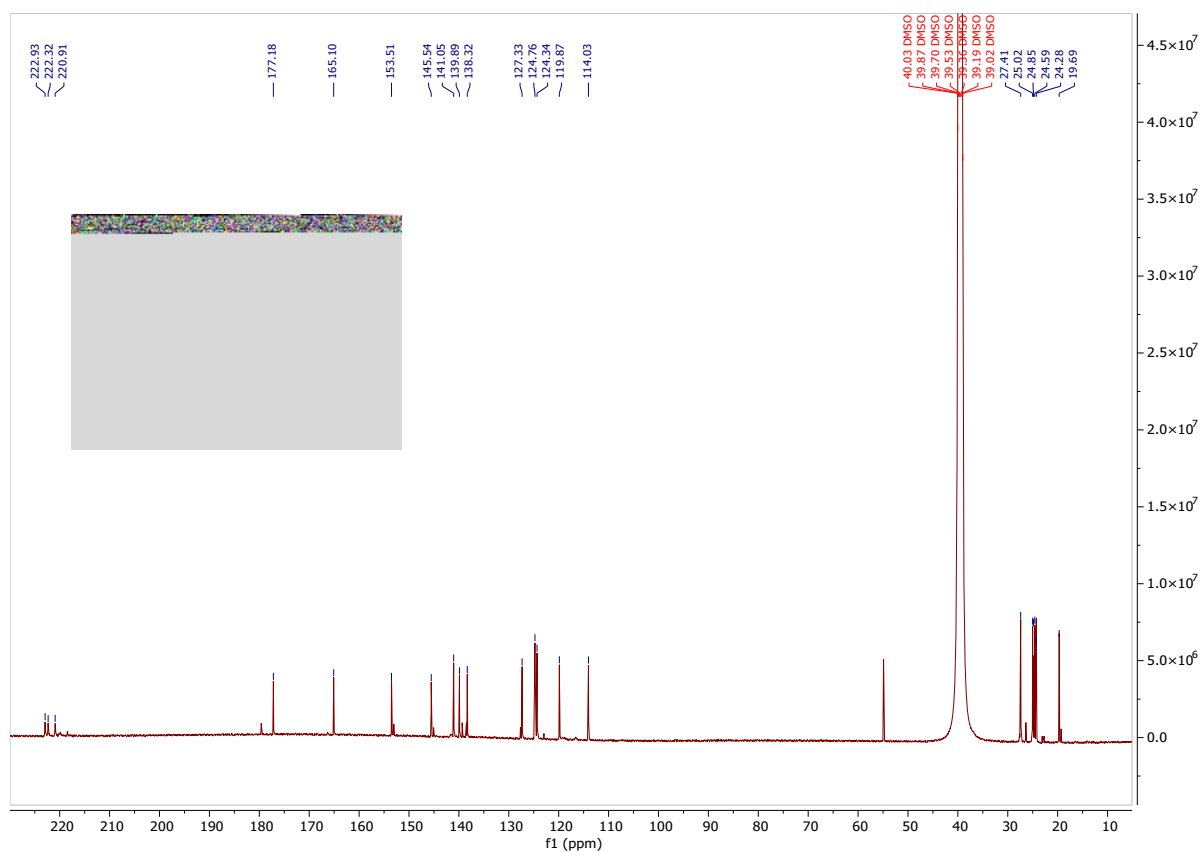

**figure S14**  $^{13}\text{C}\{^1\text{H}\}$  NMR spectrum of **Mn1a**; recorded in  $\text{DMSO-}d_6$  at ambient temperature

**F**

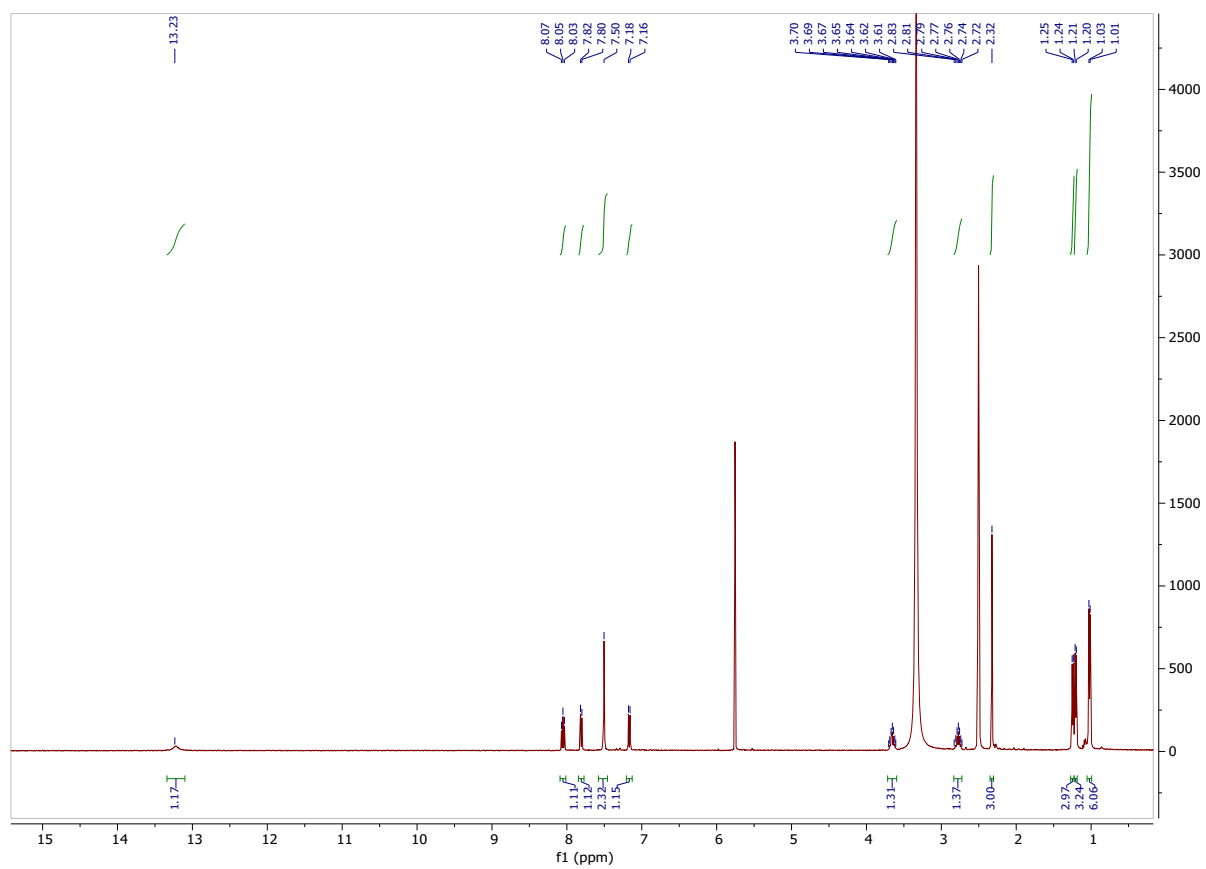

**Figure S15**  $^1\text{H}$  NMR spectrum of **Mn1b**; recorded in  $\text{DMSO-}d_6$  at ambient temperature

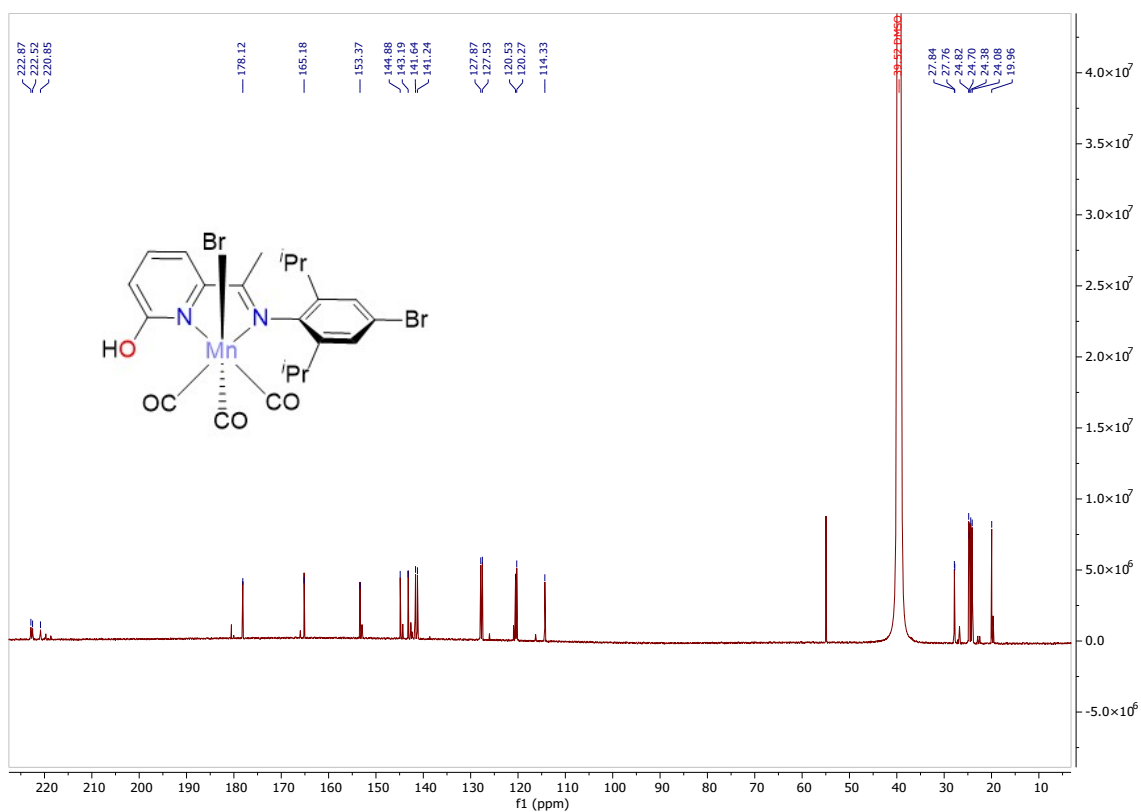

**Figure S16**  $^{13}\text{C}\{^1\text{H}\}$  NMR spectrum of **Mn1b**; recorded in  $\text{DMSO-}d_6$  at ambient temperature

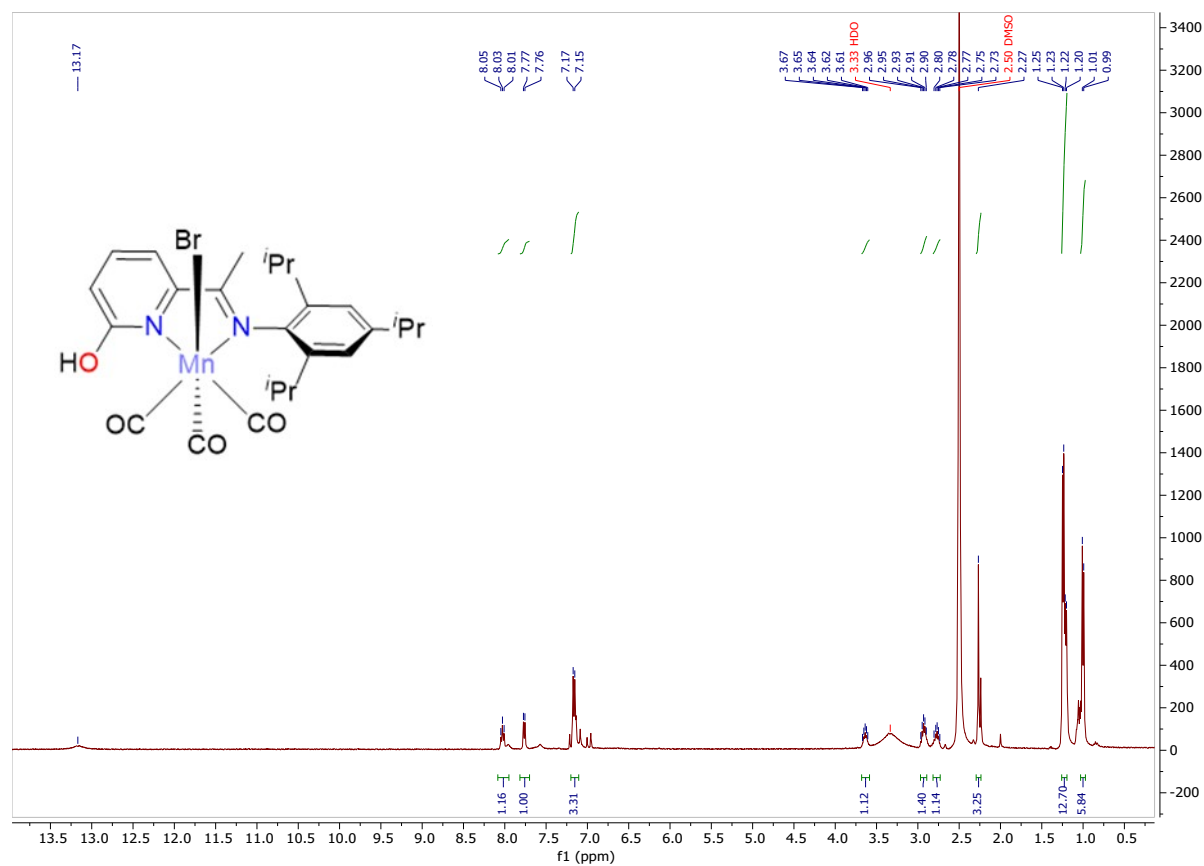

**Figure S17**  $^1\text{H}$  NMR spectrum of **Mn1c**; recorded in  $\text{DMSO-}d_6$  at ambient temperature

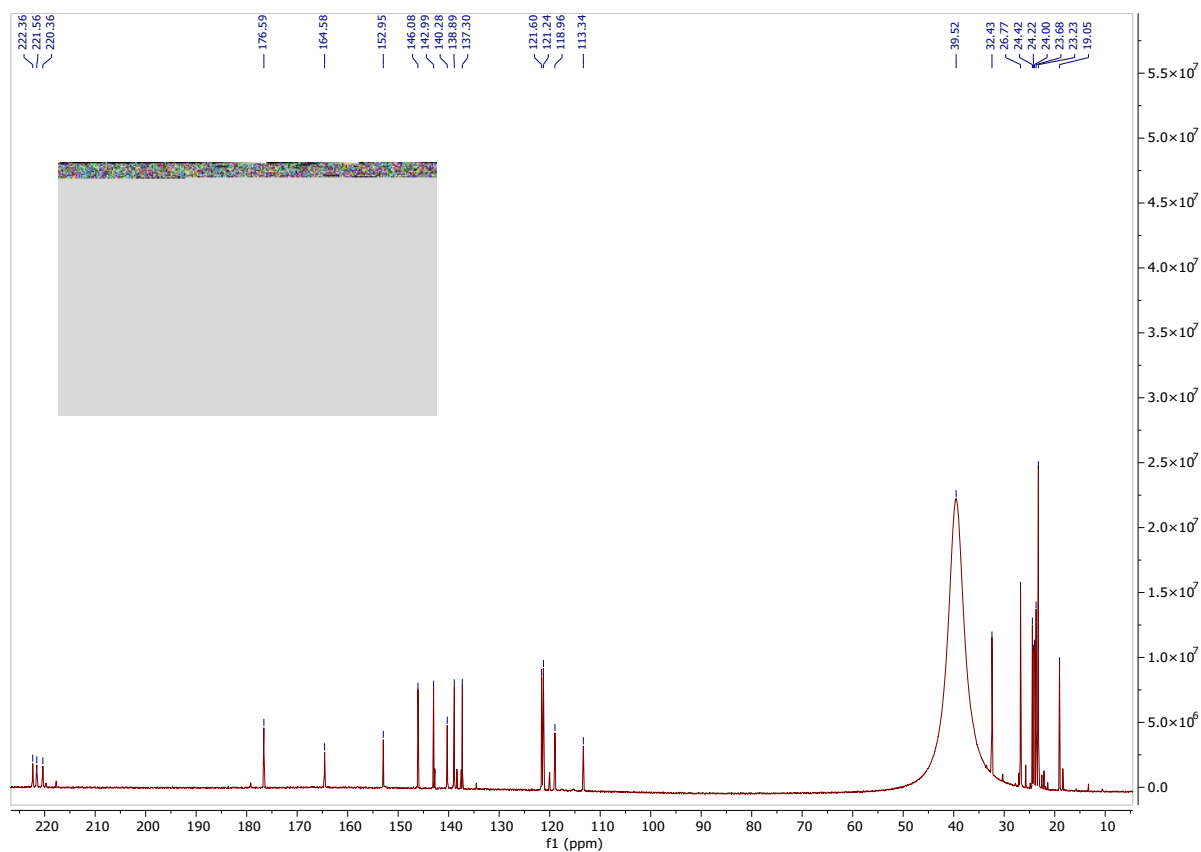

**Figure S18**  $^{13}\text{C}\{^1\text{H}\}$  NMR spectrum of **Mn1c**; recorded in  $\text{DMSO-}d_6$  at ambient temperature

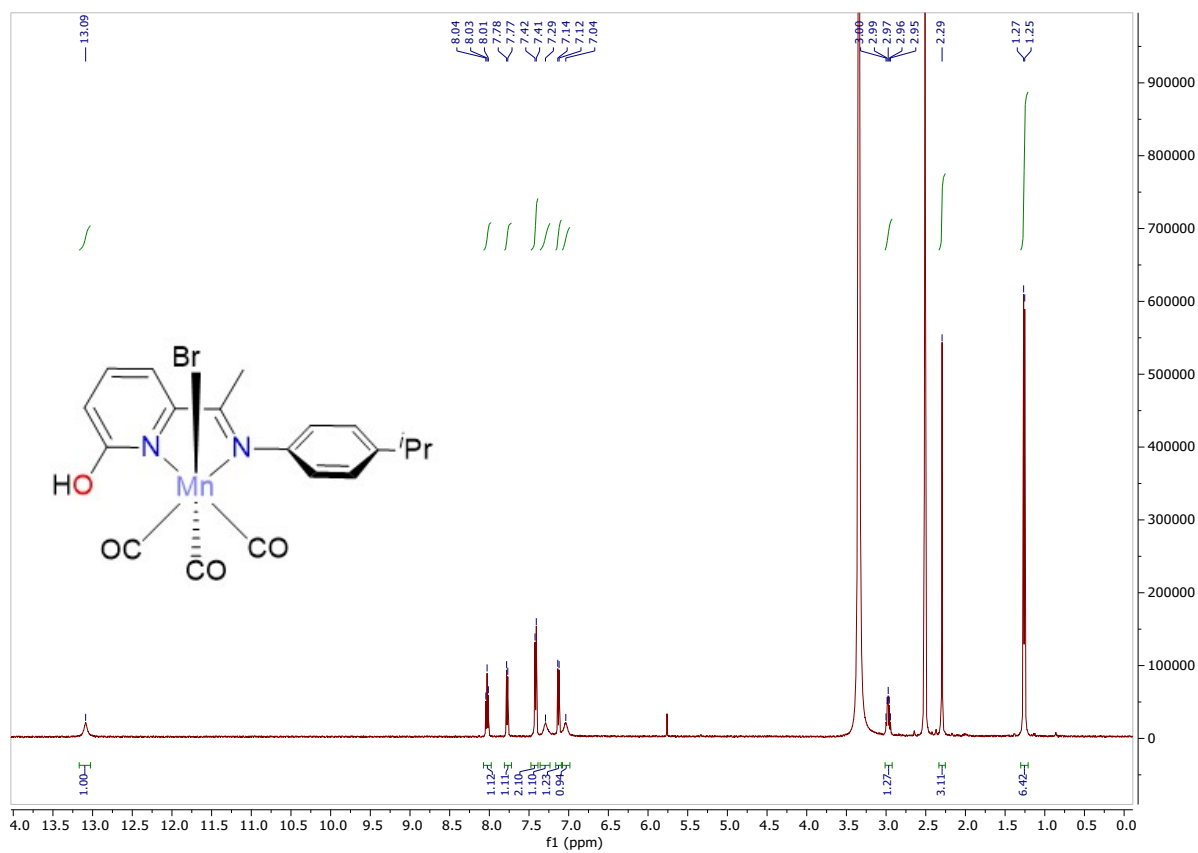

**Figure S19**  $^1\text{H}$  NMR spectrum of **Mn1d**; recorded in  $\text{DMSO-}d_6$  at ambient temperature

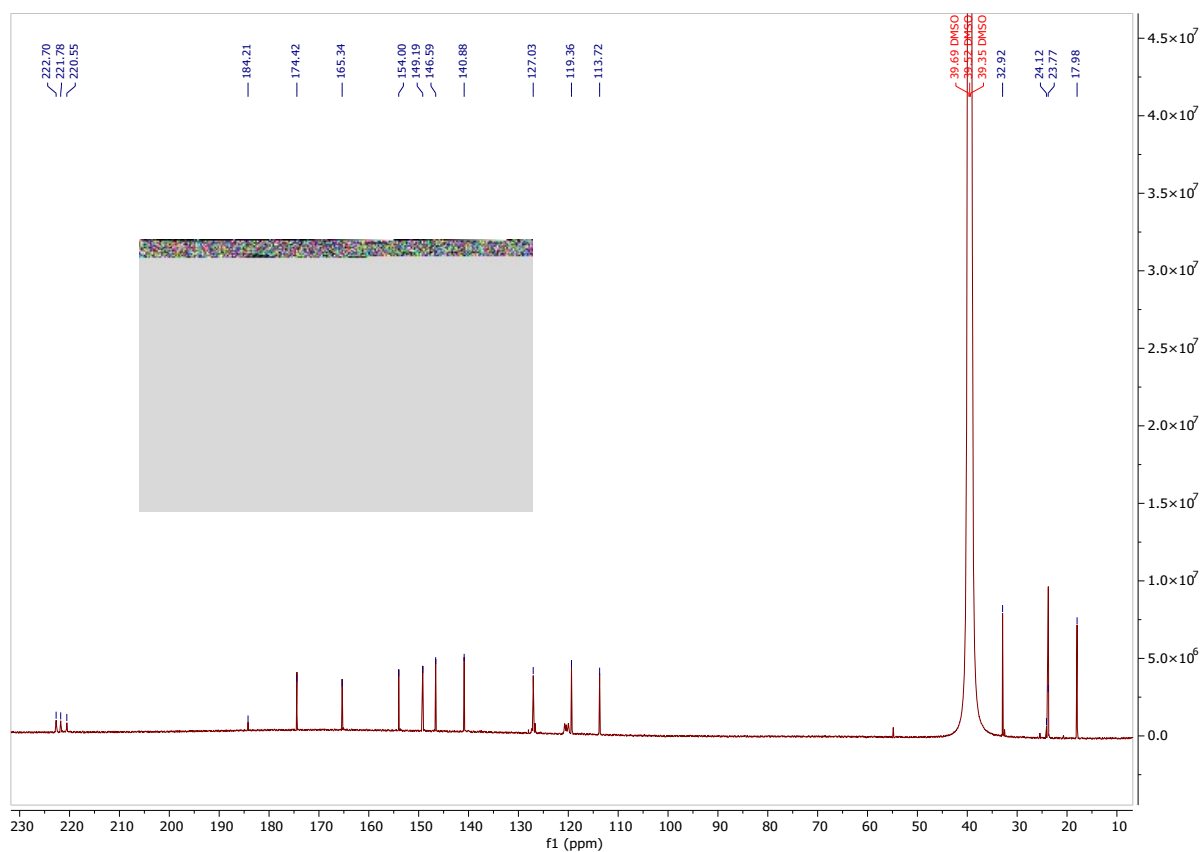

**Figure S20**  $^{13}\text{C}\{^1\text{H}\}$  NMR spectrum of **Mn1d**; recorded in  $\text{DMSO-}d_6$  at ambient temperature

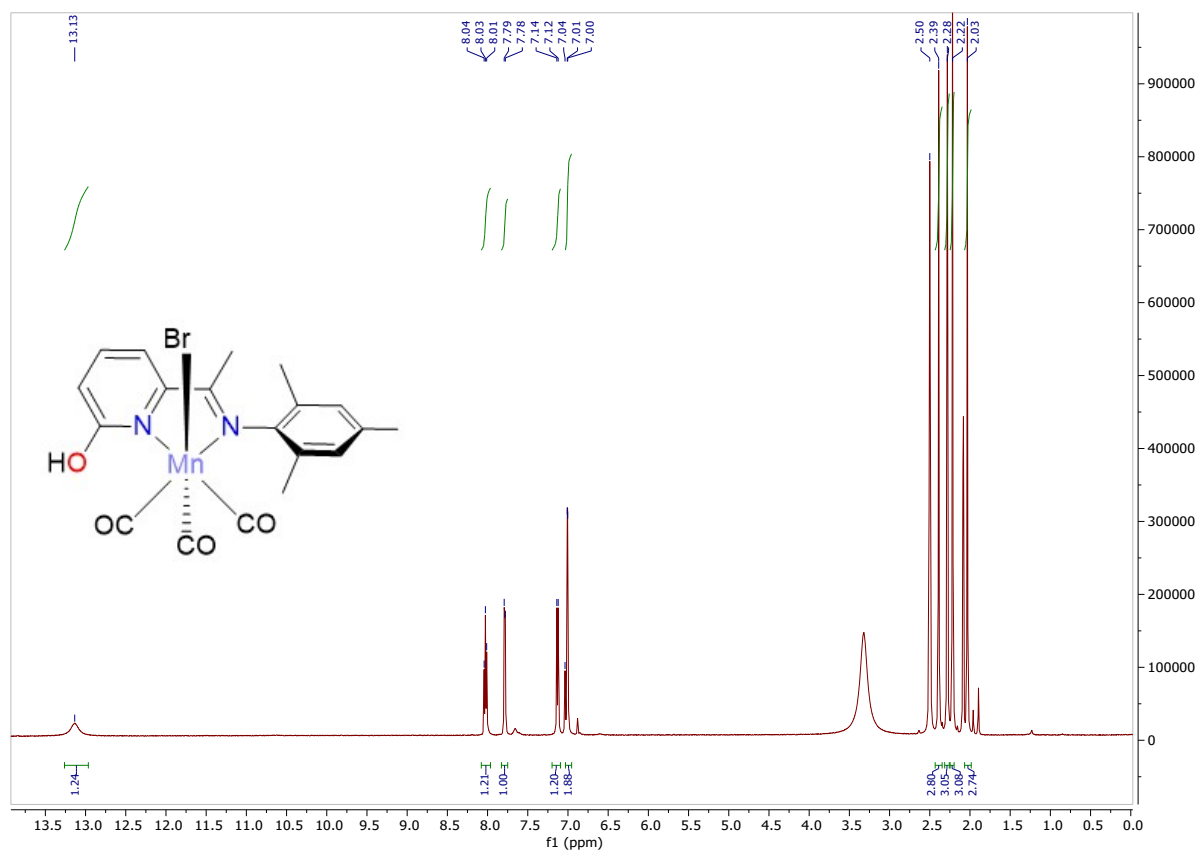

**Figure S21**  $^1\text{H}$  NMR spectrum of **Mn1e**; recorded in  $\text{DMSO-}d_6$  at ambient temperature

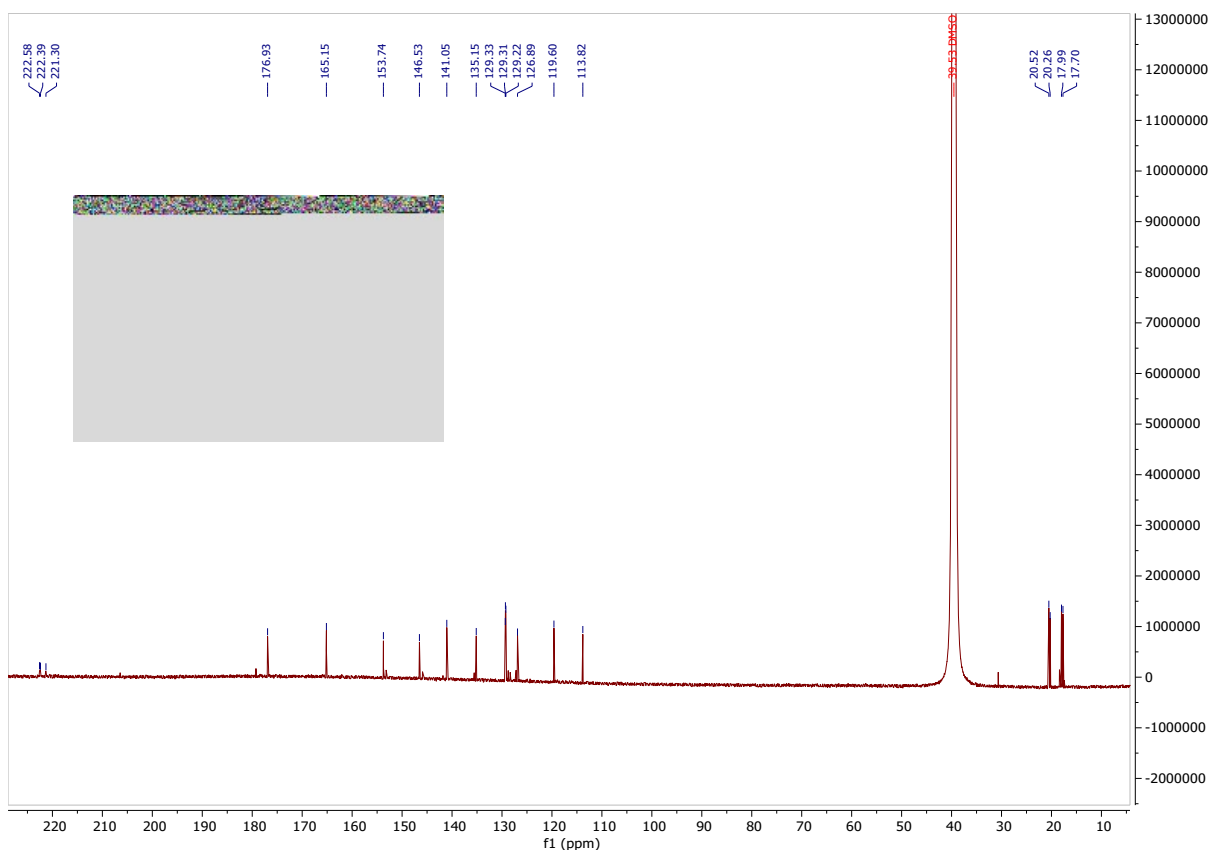

**Figure S22**  $^{13}\text{C}\{^1\text{H}\}$  NMR spectrum of **Mn1e**; recorded in  $\text{DMSO-}d_6$  at ambient temperature

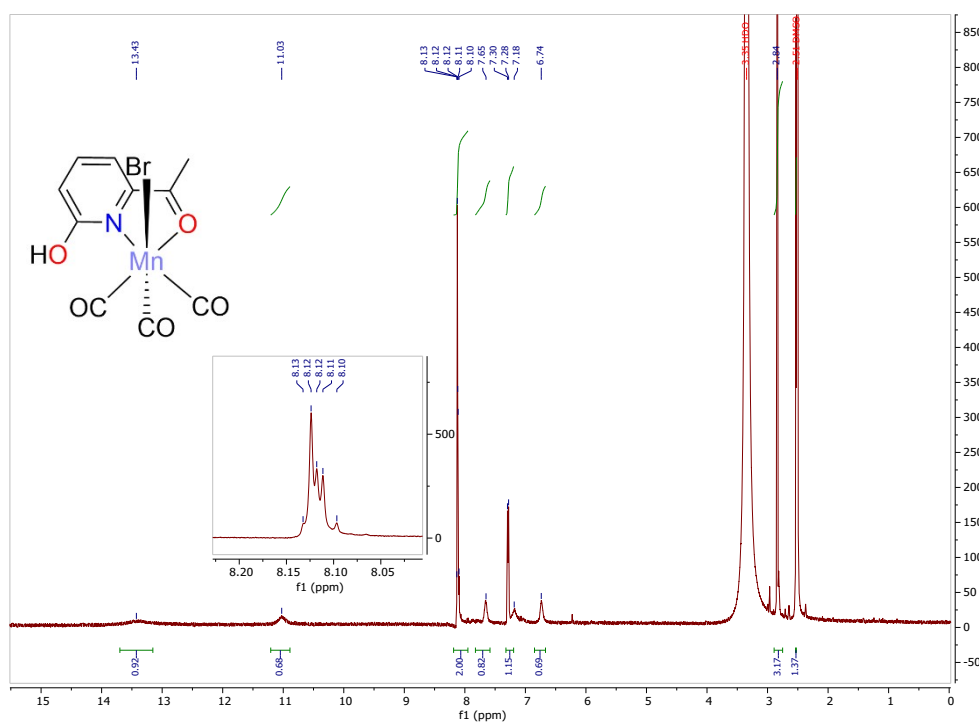

**Figure S23**  $^1\text{H}$  NMR spectrum of **Mn2**; recorded in  $\text{DMSO-}d_6$  at ambient temperature. Note: the broad peaks (ca. 40%)  $\delta$  11.03 7.65, 7.18, 6.74 and 2.52 ppm have been tentatively assigned to  $[[2\text{-OH-6-(CMe=O)C}_5\text{H}_3\text{N}]\text{Mn}(\text{DMSO})(\text{CO})_3](\text{Br})$  (**Mn2(DMSO)**). For related adduct formation see reference 1.<sup>1</sup>

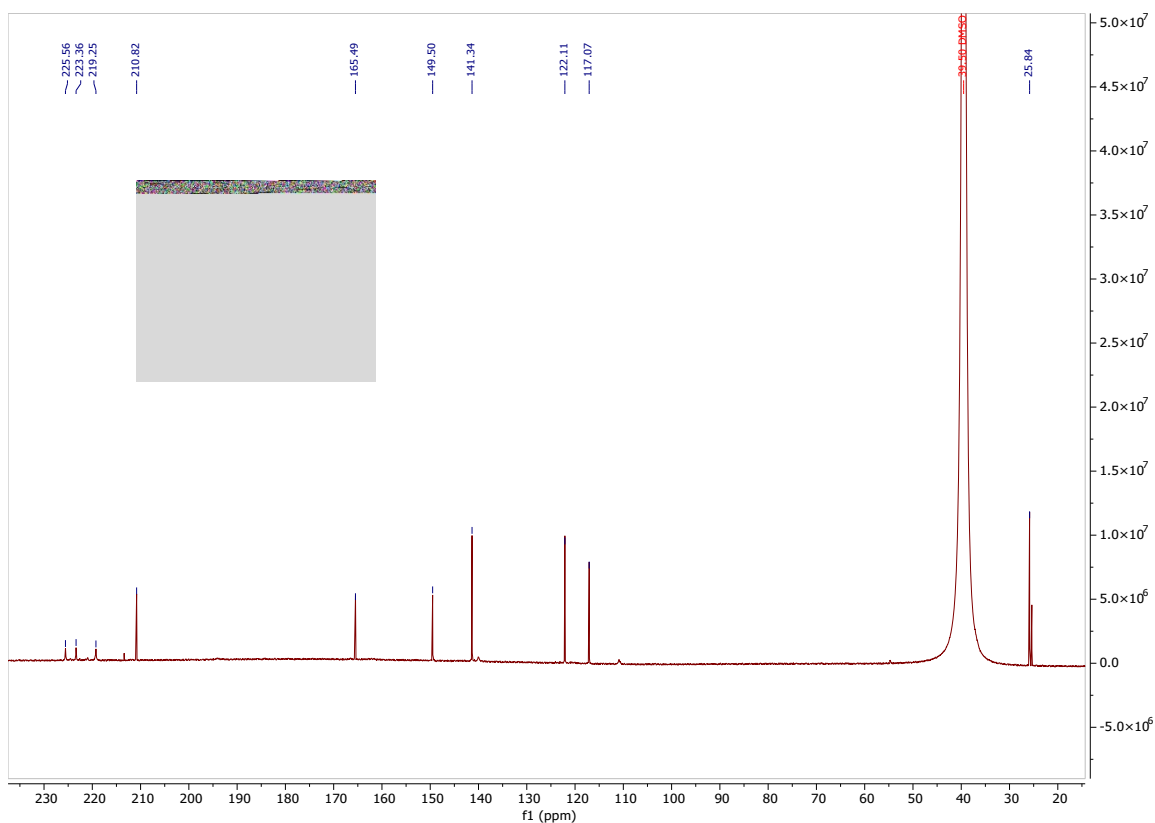

**Figure S24**  $^{13}\text{C}\{^1\text{H}\}$  NMR spectrum of **Mn2**; recorded in  $\text{DMSO-}d_6$  at ambient temperature. The absence of peaks relating to (**Mn2**( $\text{DMSO}$ )) is likely due to broadening as noted in the  $^1\text{H}$  NMR spectrum.

### 3. IR spectra of starting materials and HL1a – HL1e

All infra-red spectra were obtained using a Bruker ALPHA II compact FT-IR spectrometer using solid samples.

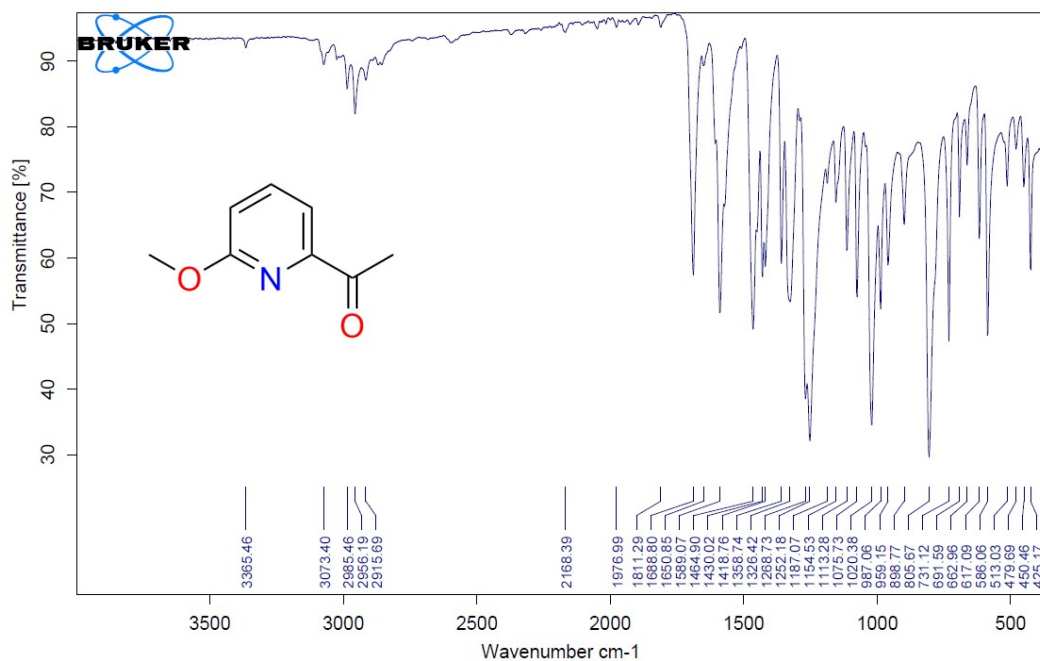

**Figure S25** FT-IR spectrum of 6-acetyl-2-methoxy-pyridine

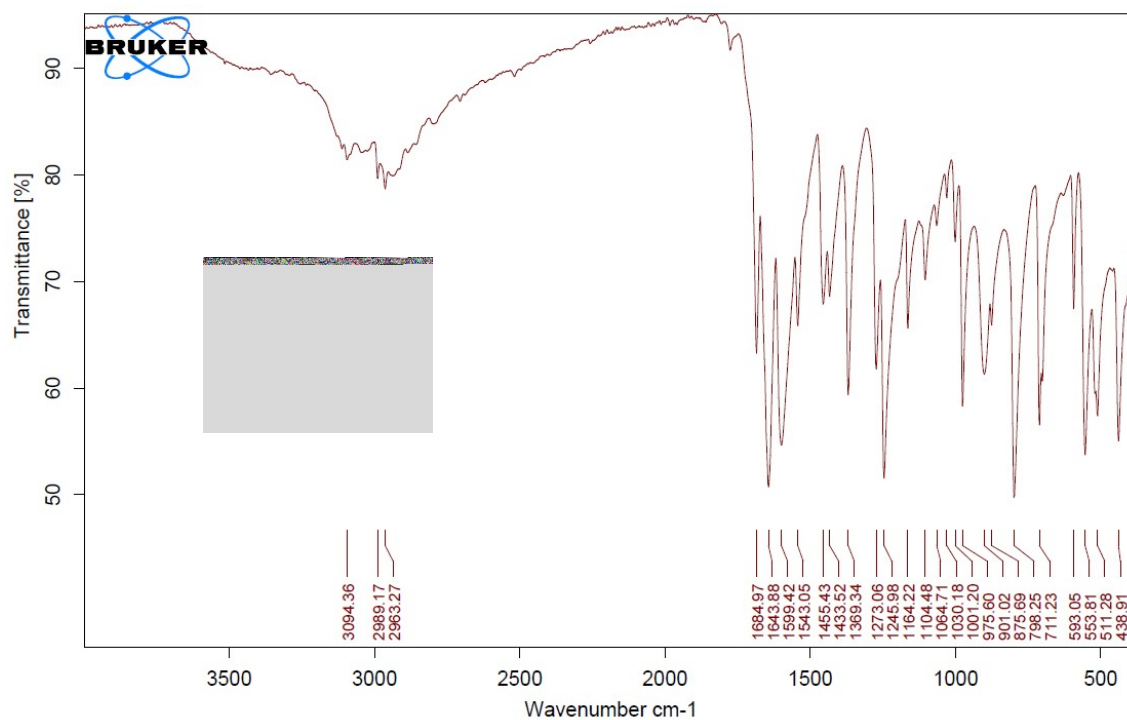

Figure S26 FT-IR spectrum of 6-acetyl-pyridin-2-one

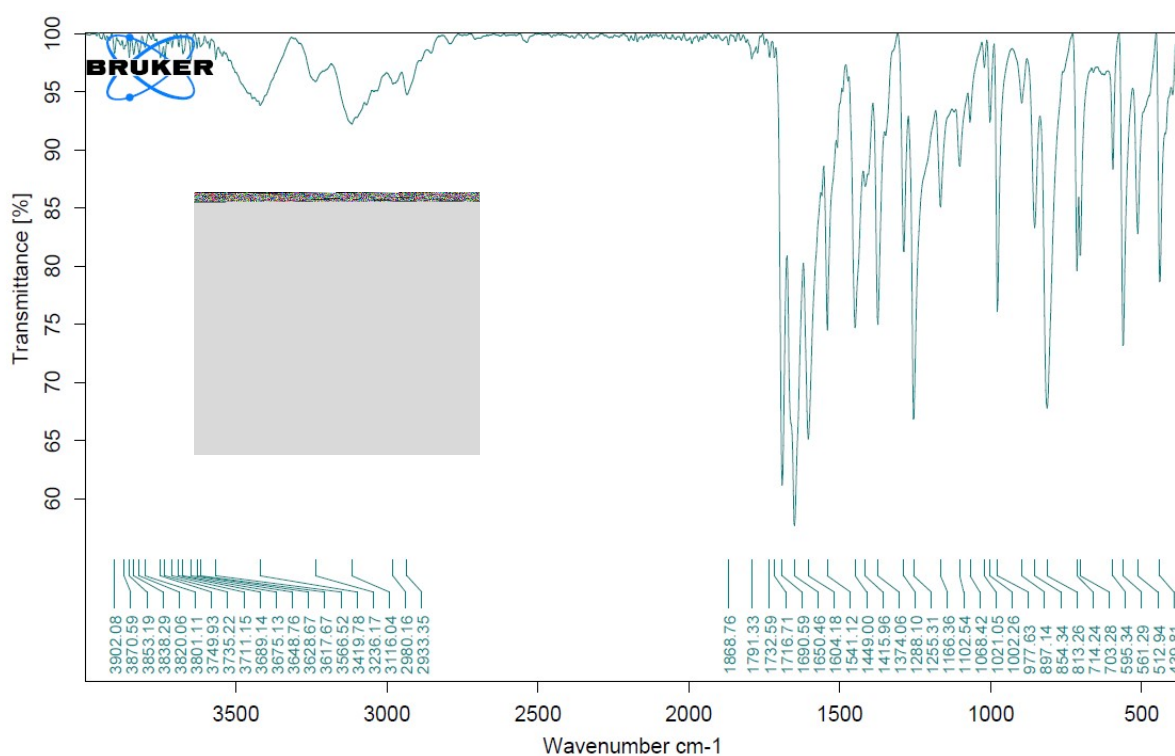

Figure S27 FT-IR spectrum of HL1a

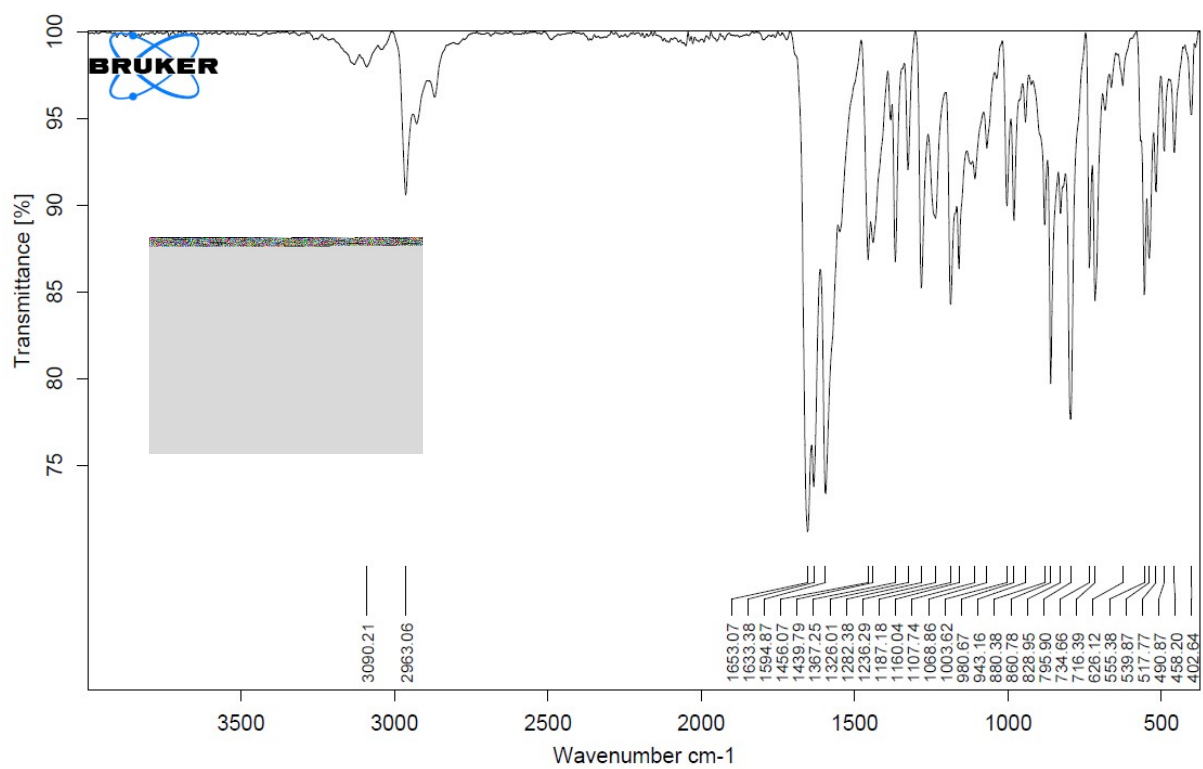

**Figure S28** FT-IR spectrum of **HL1b**

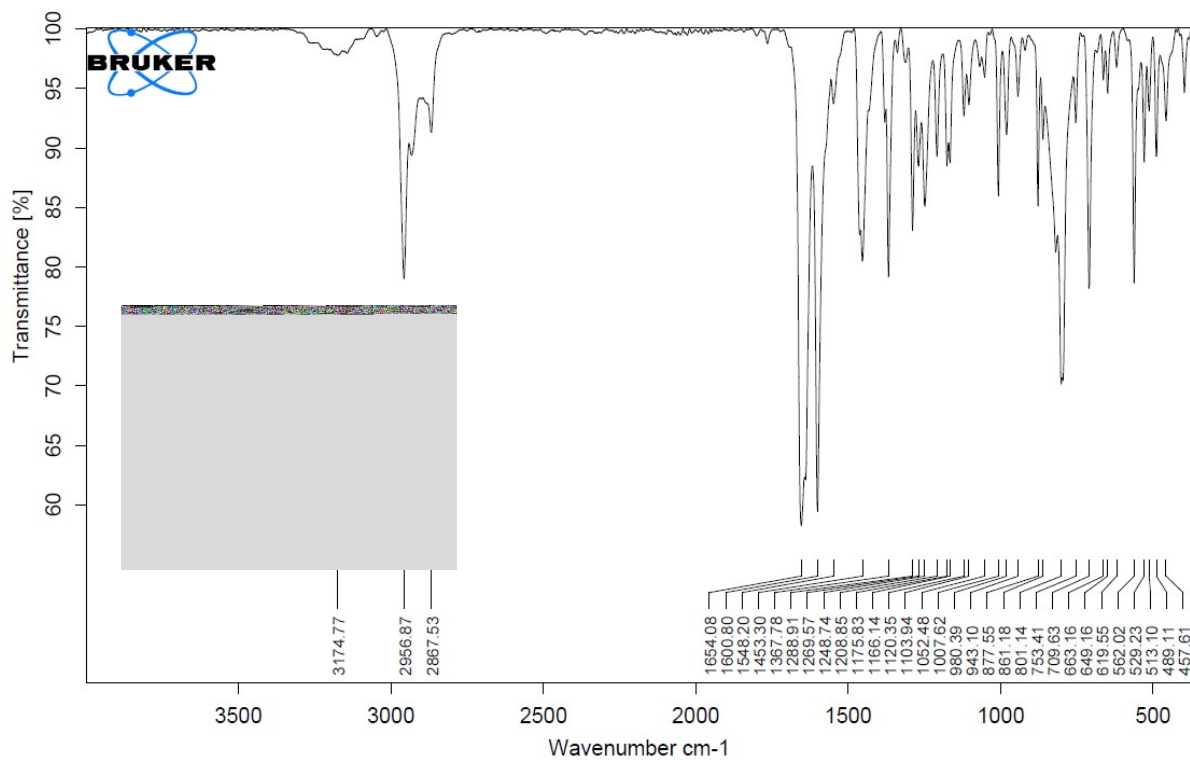

Figure S29 FT-IR spectrum of HL1c

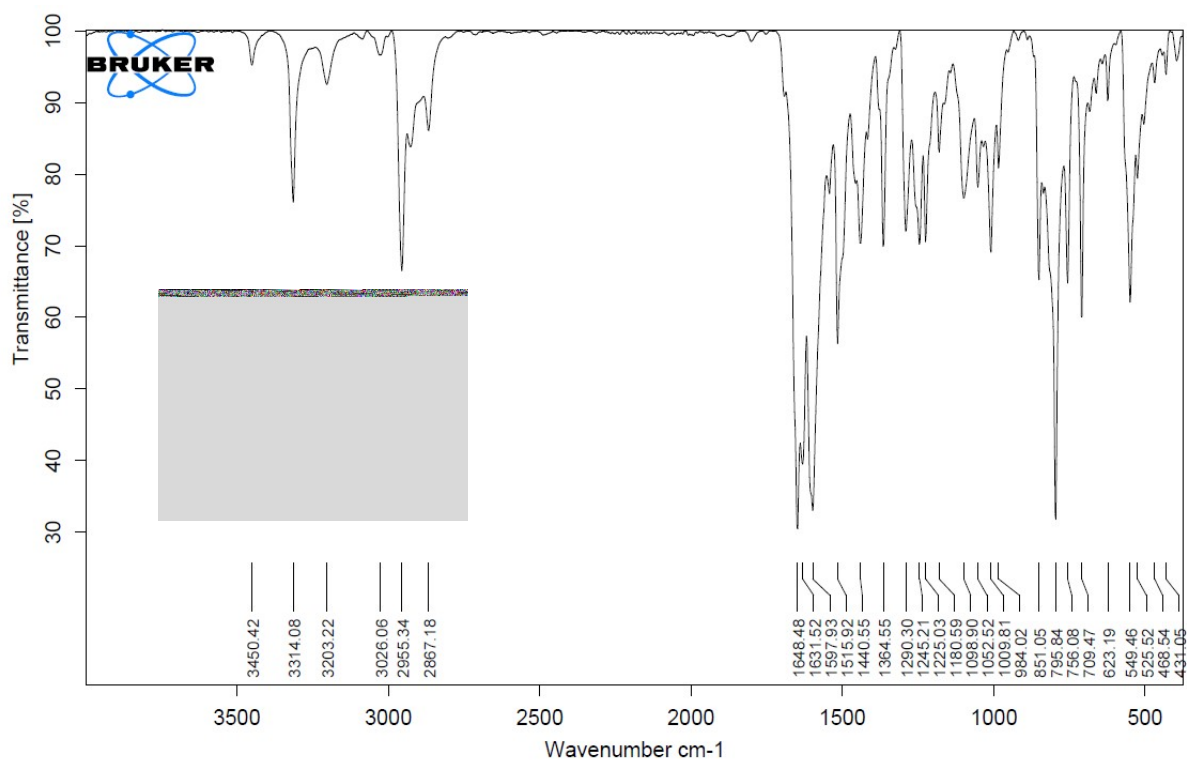

Figure S30 FT-IR spectrum of HL1d

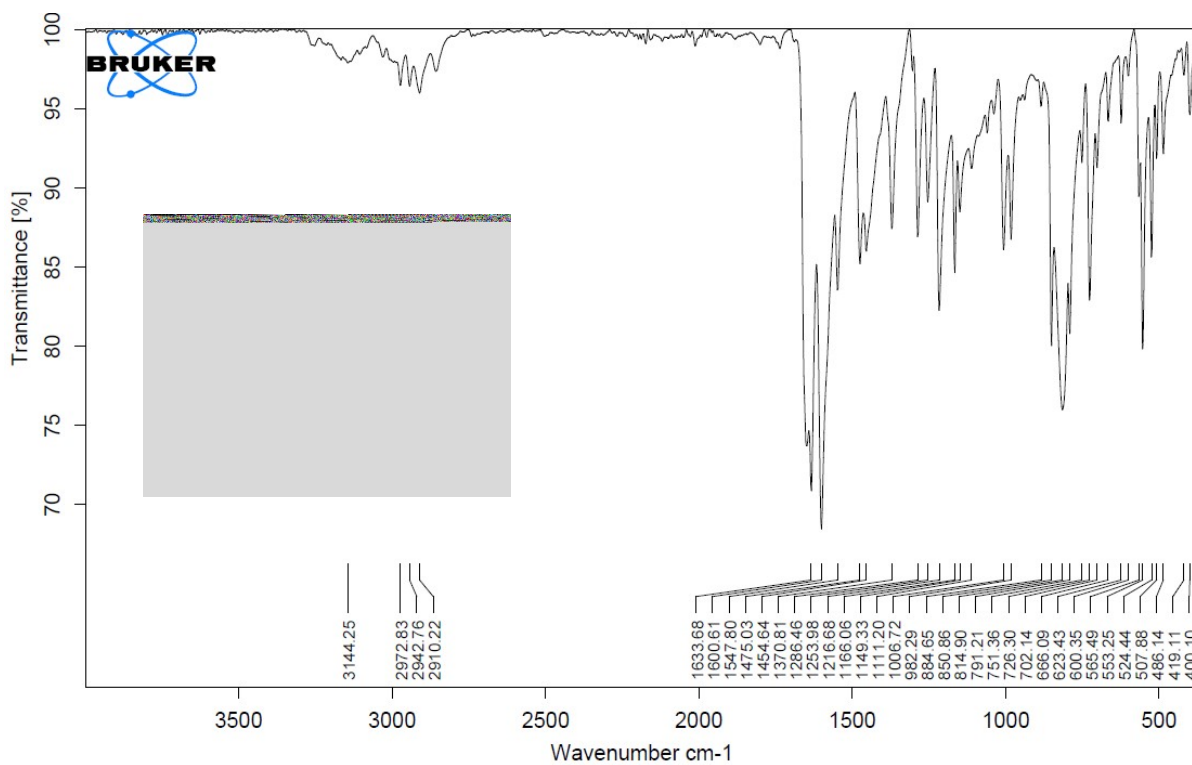

Figure S31 FT-IR spectrum of HL1e

#### 4. IR spectra of complexes Mn1a – Mn1e and Mn2

All infra-red spectra of the complexes were recorded using a Bruker ALPHA II compact FT-IR spectrometer using solid samples.

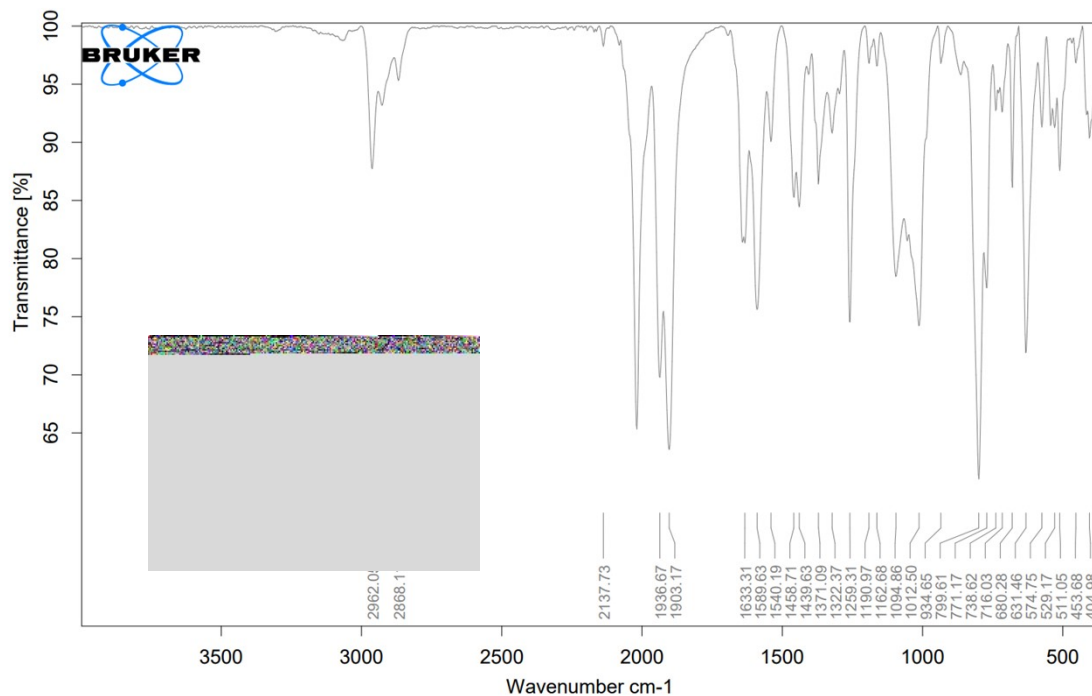

Figure S32 FT-IR spectrum of Mn1a

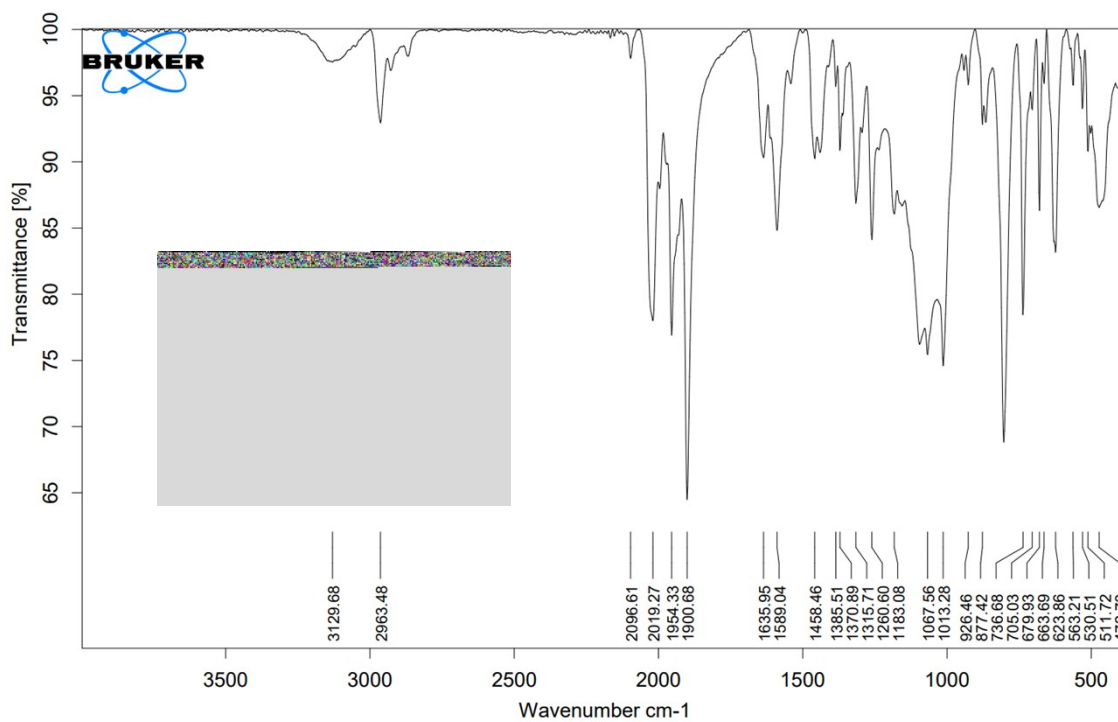

Figure S33 FT-IR spectrum of Mn1b

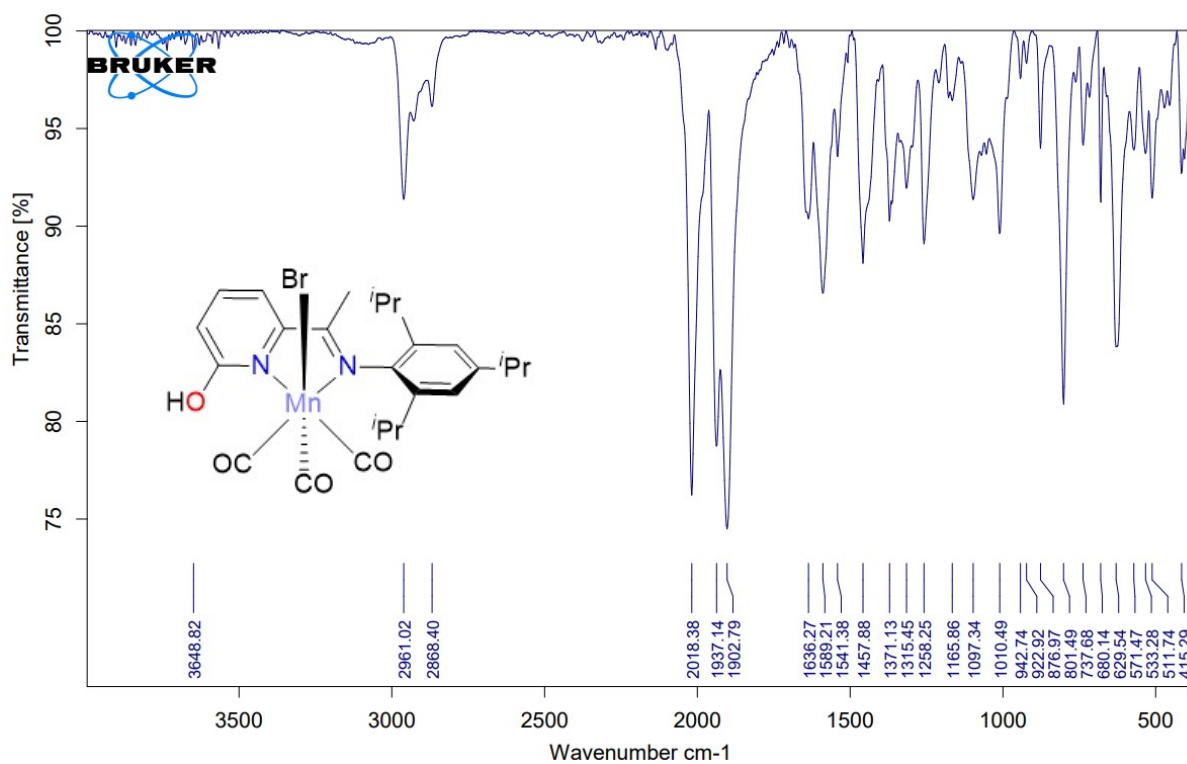

Figure S34 FT-IR spectrum of Mn1c

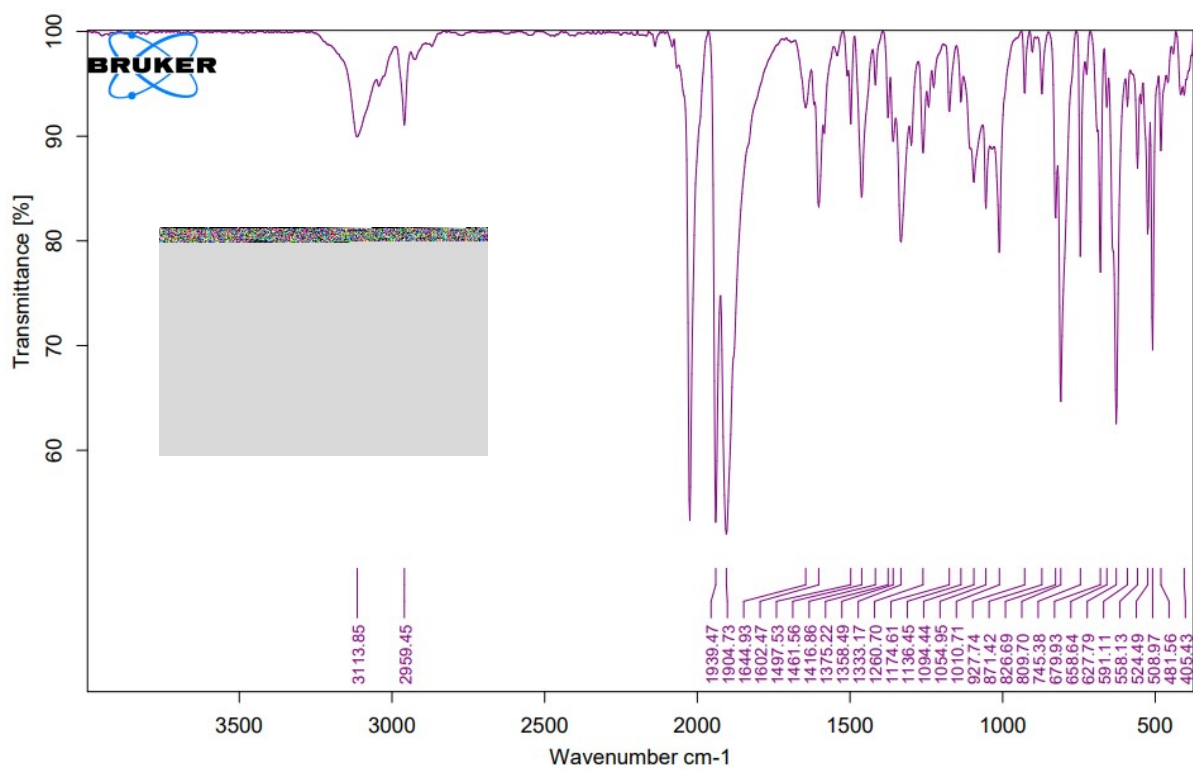

Figure S35 FT-IR Spectrum of Mn1d

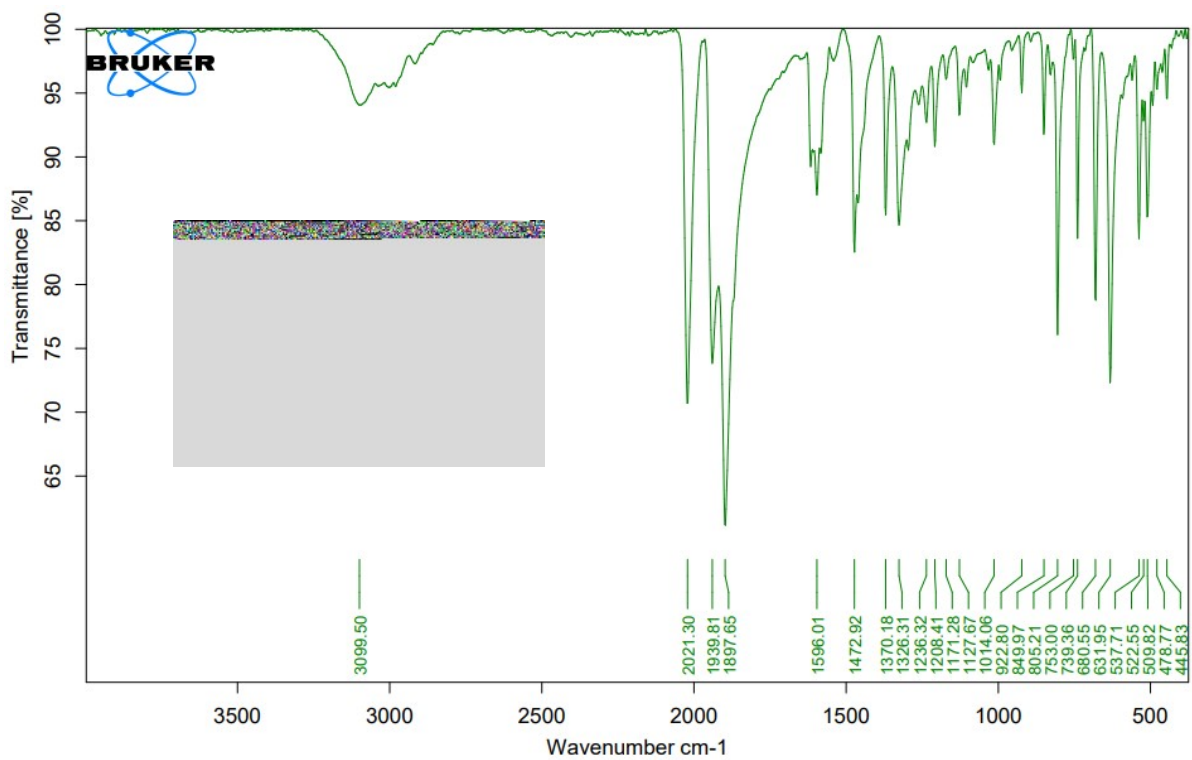

Figure S36 FT-IR spectrum of Mn1e

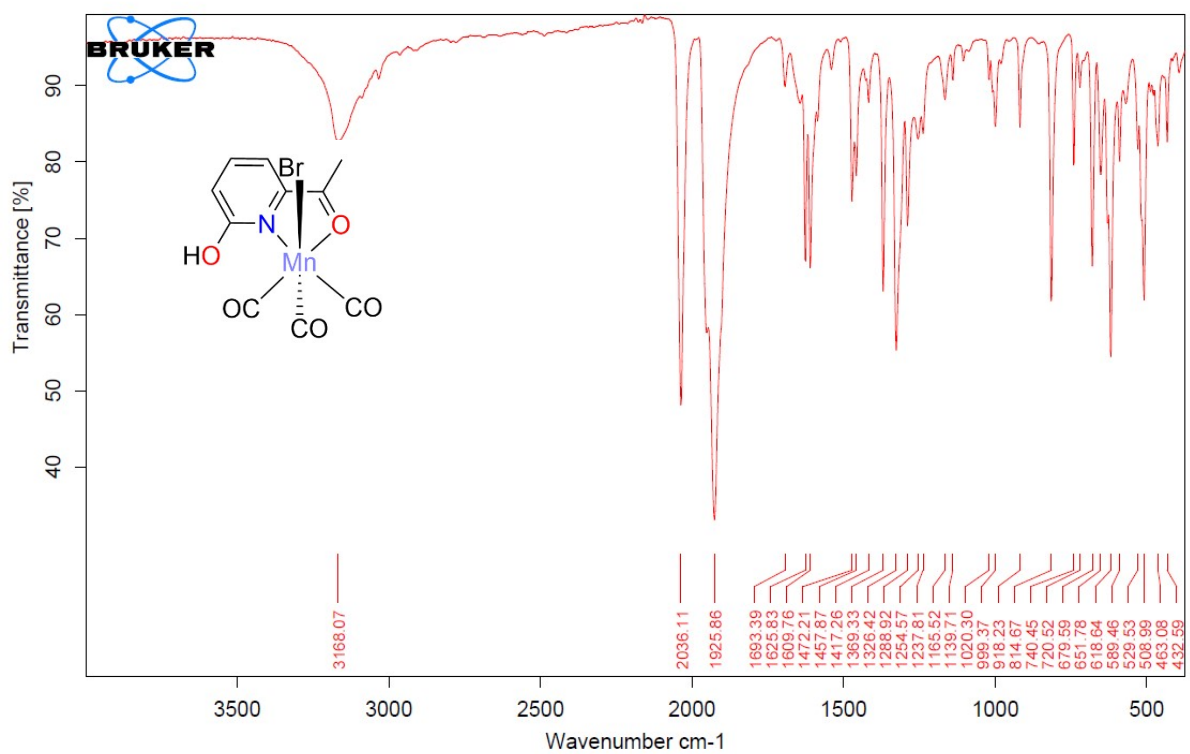

Figure S37 FT-IR spectrum of Mn2

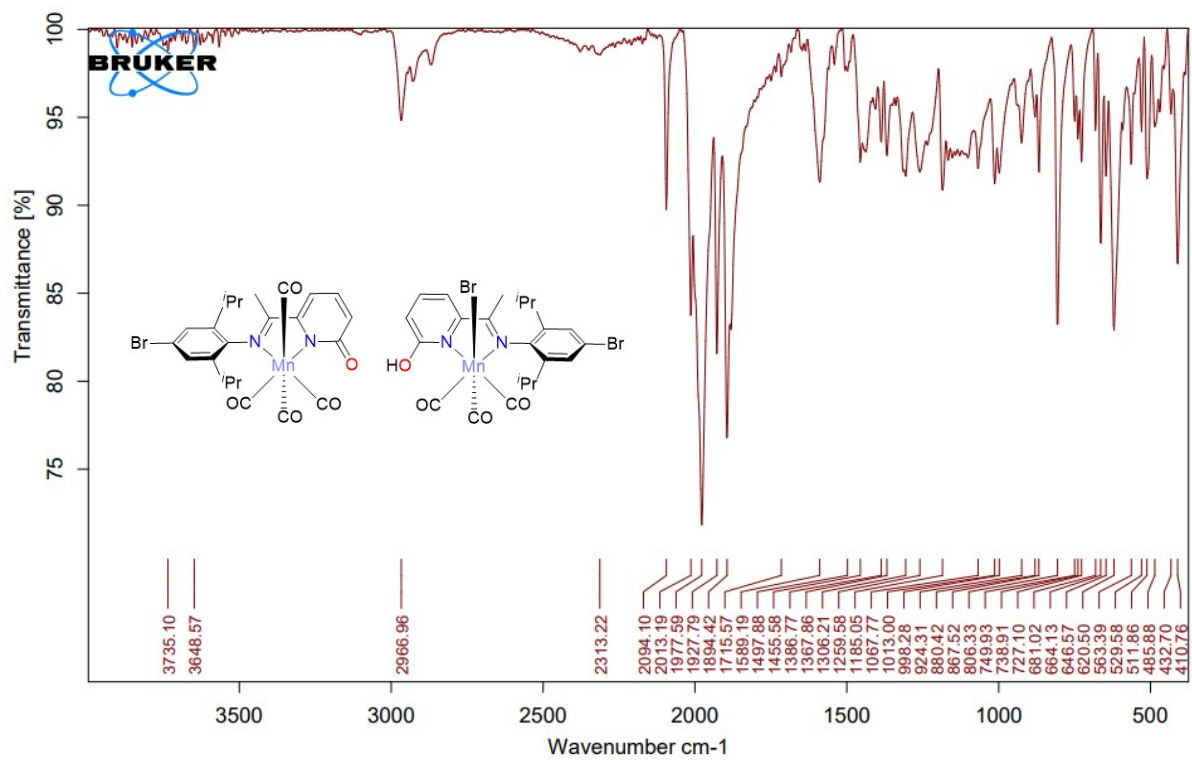

**Figure S38** FT-IR spectrum of co-crystallised **Mn1b**···[2-O-6-{CMe=N(2,6-*i*Pr<sub>2</sub>-4-BrC<sub>6</sub>H<sub>2</sub>)}C<sub>5</sub>H<sub>3</sub>N]Mn(CO)<sub>4</sub> (**Mn1b'**)

## 5. Catalytic evaluation for transfer hydrogenation

### 5.1 General Procedure employed in the transfer hydrogenation of aryl ketones 1a – 1n

An oven dry 20 mL Schlenk flask with a micro stir bar was evacuated and backfilled with nitrogen. To this K<sup>t</sup>BuO was added (7.0 mg, 0.06 mmol, 3 mol%) and the flask re-evacuated. Dry <sup>1</sup>PrOH (5 mL) was then added and the contents of the vessel stirred to dissolve/suspend the K<sup>t</sup>BuO in solution. **Mn1d** (4.7 mg, 0.01 mmol, 0.5 mol%) was added and stirred to form the active species as a red solution. The substrate was then added (2 mmol) and the reaction surrounded in foil and placed into an oil bath set at 80 °C for 24 h. After cooling the reaction mixture to room temperature, the mixture was diluted with dichloromethane (5 mL) and passed through a silica plug eluting with dichloromethane. NMR spectra were then recorded in CDCl<sub>3</sub>.

### 5.2 NMR method used to measure conversions

All conversions were calculated using the methyl CH<sub>3</sub> protons on the acetophenone derivatives and their corresponding alcohol. Quantitative <sup>1</sup>H NMR spectroscopy was used with adjusted T1 values to give accurate integrations of the signals for the conversion calculations. T1 values calculated from a random reaction mixture was used and T1 values shown below. NMR data matched the literature values for alcoholic products [(**2a**, **2b**, **2c**, **2d**, **2f**),<sup>2</sup> (**2e**, **2g**, **2n**, **2k**),<sup>3</sup> (**2l**),<sup>4</sup> (**2h**),<sup>5</sup> (**2i**),<sup>6</sup> and (**2j**)<sup>7</sup>].

---

|                                        |                                          |
|----------------------------------------|------------------------------------------|
| Fitted function:                       | $f(t) = I_0 * [1 - a * \exp(-t/T1)]$     |
| Random error estimation of data:       | RMS per spectrum (or trace/plane)        |
| Systematic error estimation of data:   | worst case per peak scenario             |
| Fit parameter Error estimation method: | from fit using arbitrary y uncertainties |
| Confidence level:                      | 95%                                      |
| Used peaks:                            |                                          |
| Used integrals:                        | area integral                            |
| Used Mixing time:                      | all values (including replicates) used   |

---

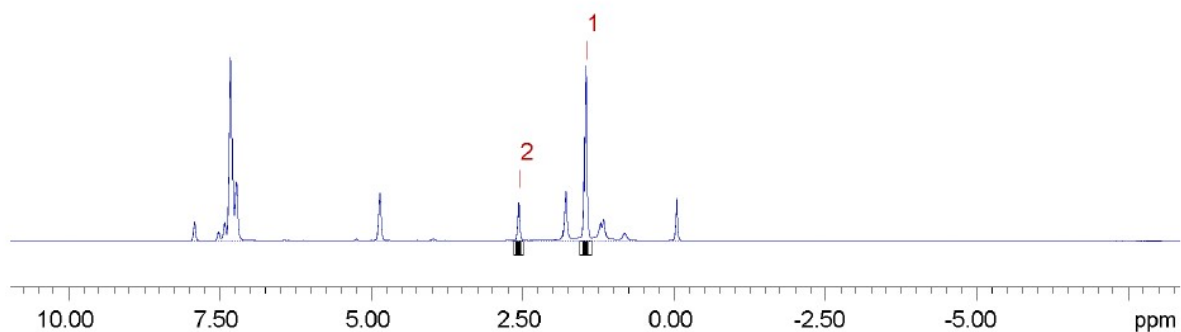

| Peak name | F2 [ppm] | T1 [s] | Error   |
|-----------|----------|--------|---------|
| 1         | 1.451    | 2.32   | 0.05072 |
| 2         | 2.557    | 3.96   | 0.04634 |

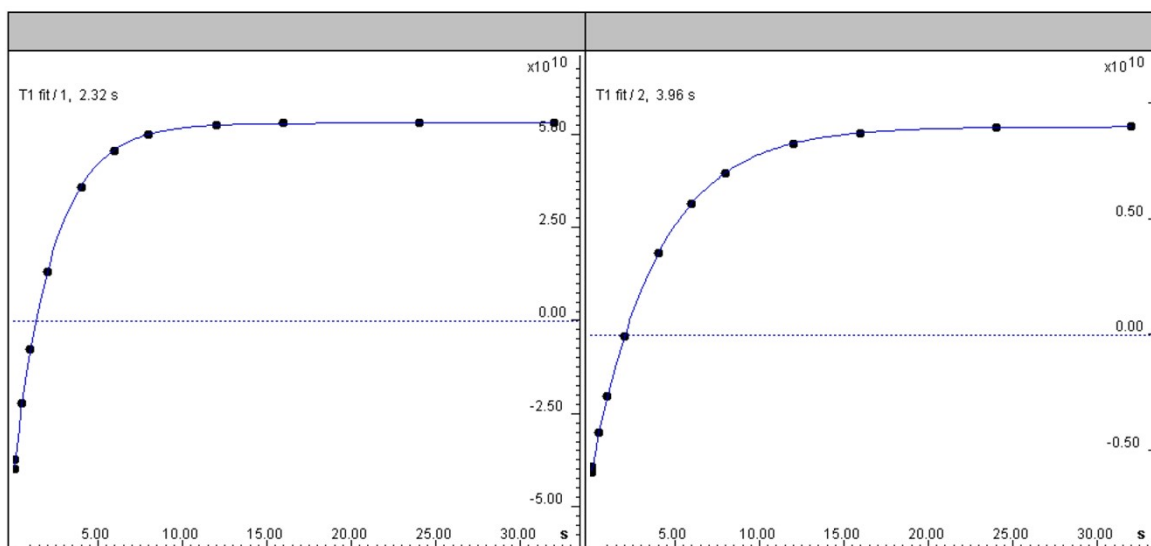

**Figure S39** Measured T1 parameters for a typical reaction mixture measured in  $\text{CDCl}_3$

### 5.3 $^1\text{H}$ (and $^{19}\text{F}$ ) NMR spectra used to measure percentage conversions

All NMR spectra ( $^1\text{H}$ ,  $^{19}\text{F}$ ) were recorded on a Bruker Avance III 500 MHz spectrometer with a 5 mm BBO probe, Bruker Avance III HD 400 MHz spectrometer with a 5 mm BBO probe and a Bruker Avance NEO 500 MHz spectrometer with either a 5 mm Prodigy BBO cryoprobe or a 5 mm BBFO probe. All deuterated solvents were purchased from Goss Scientific and Sigma-Aldrich.

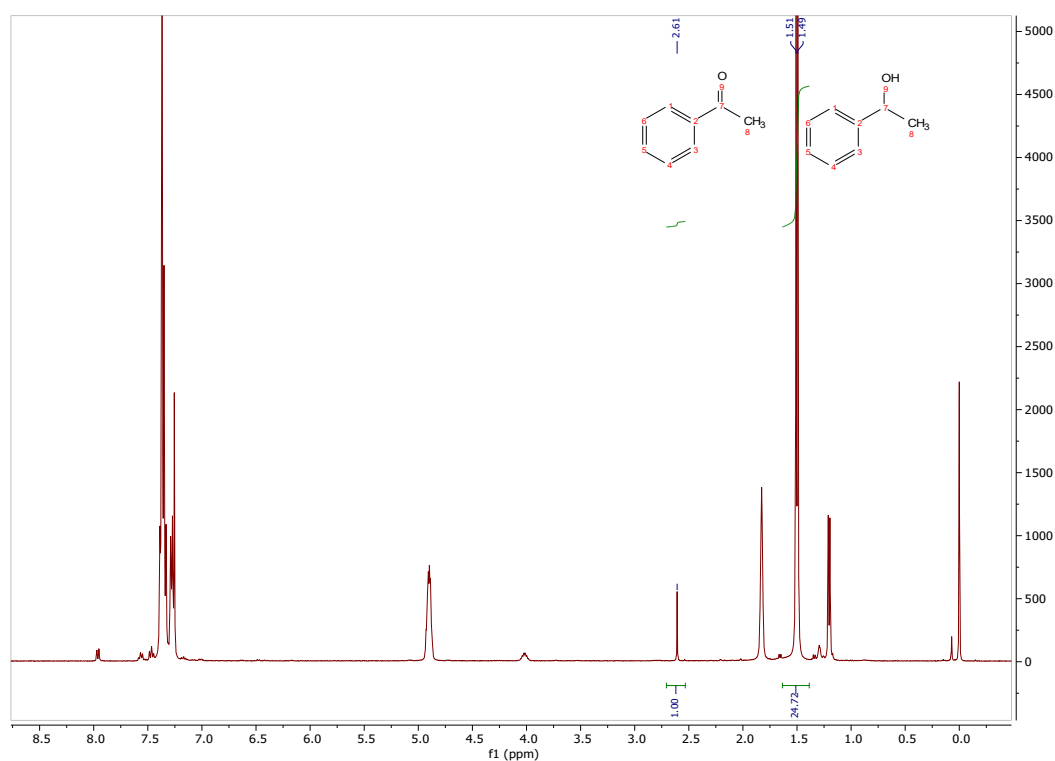

**Figure S40**  $^1\text{H}$  NMR spectrum of reaction mixture following the TH of acetophenone (**1a**) to 1-phenylethanol (**2a**) using **Mn1d** as (pre)catalyst

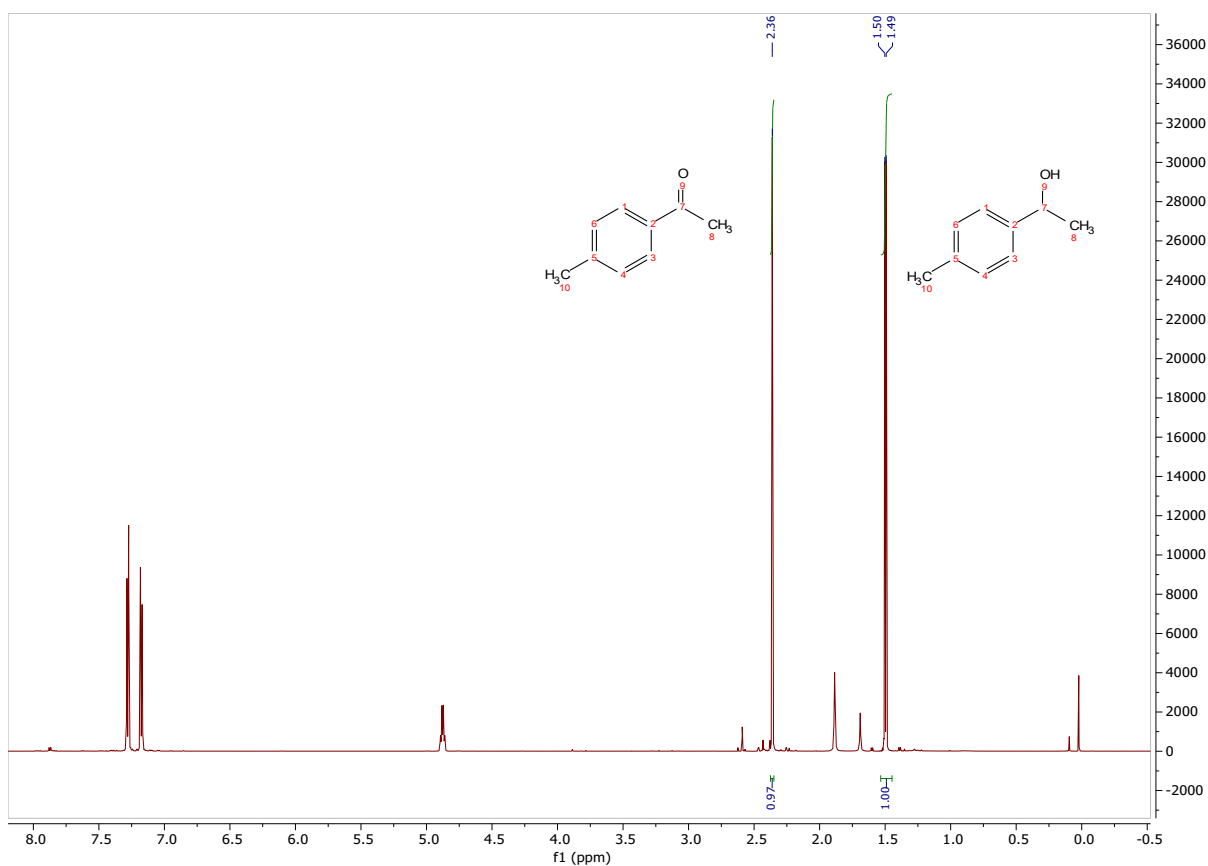

**Figure S41** <sup>1</sup>H NMR spectrum of reaction mixture following the TH of 4-methyl-acetophenone (**1b**) to methylphenyl-ethan-(2)-ol (**2b**) using **Mn1d** as (pre)catalyst

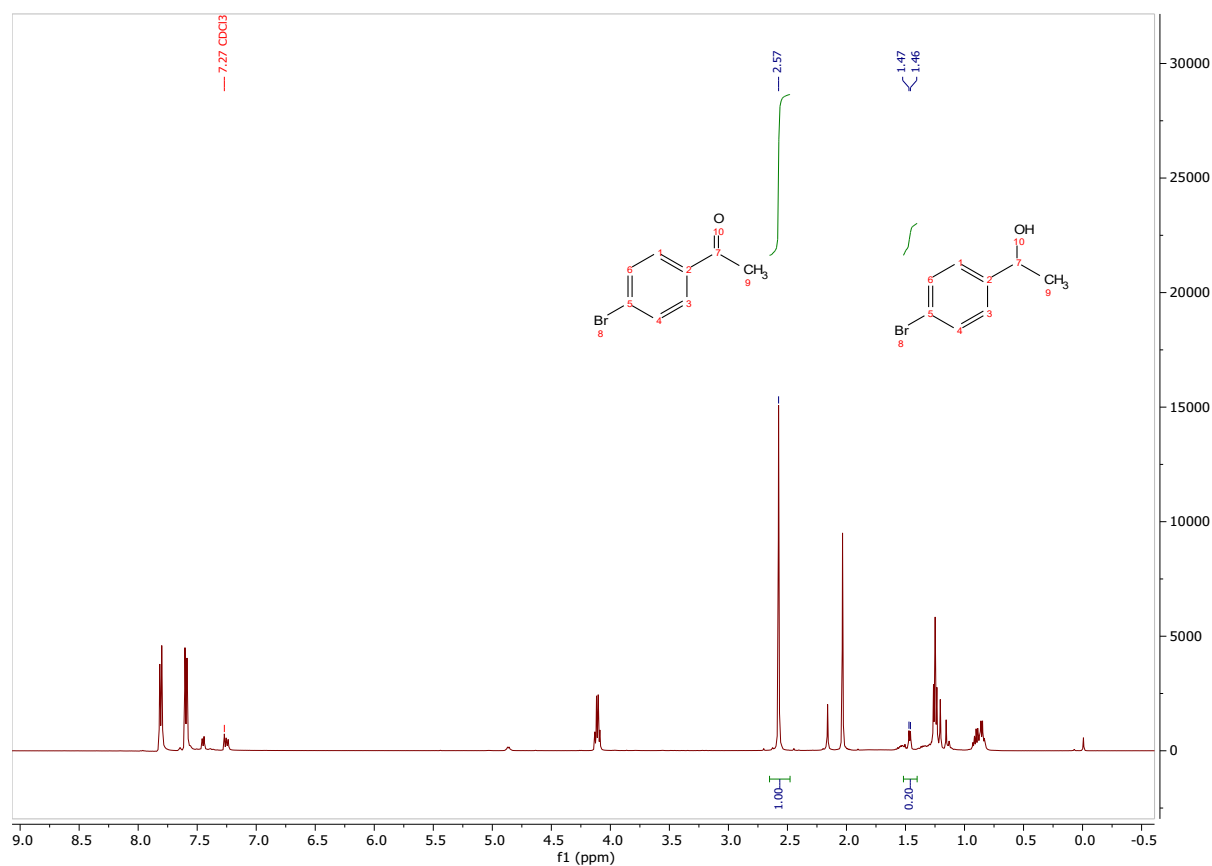

**Figure S42** <sup>1</sup>H NMR spectrum of reaction mixture following the TH of 4-bromo-acetophenone (**1c**) to 4-bromo-phenyl-ethan-(2)-ol (**2c**) using **Mn1d** as (pre)catalyst

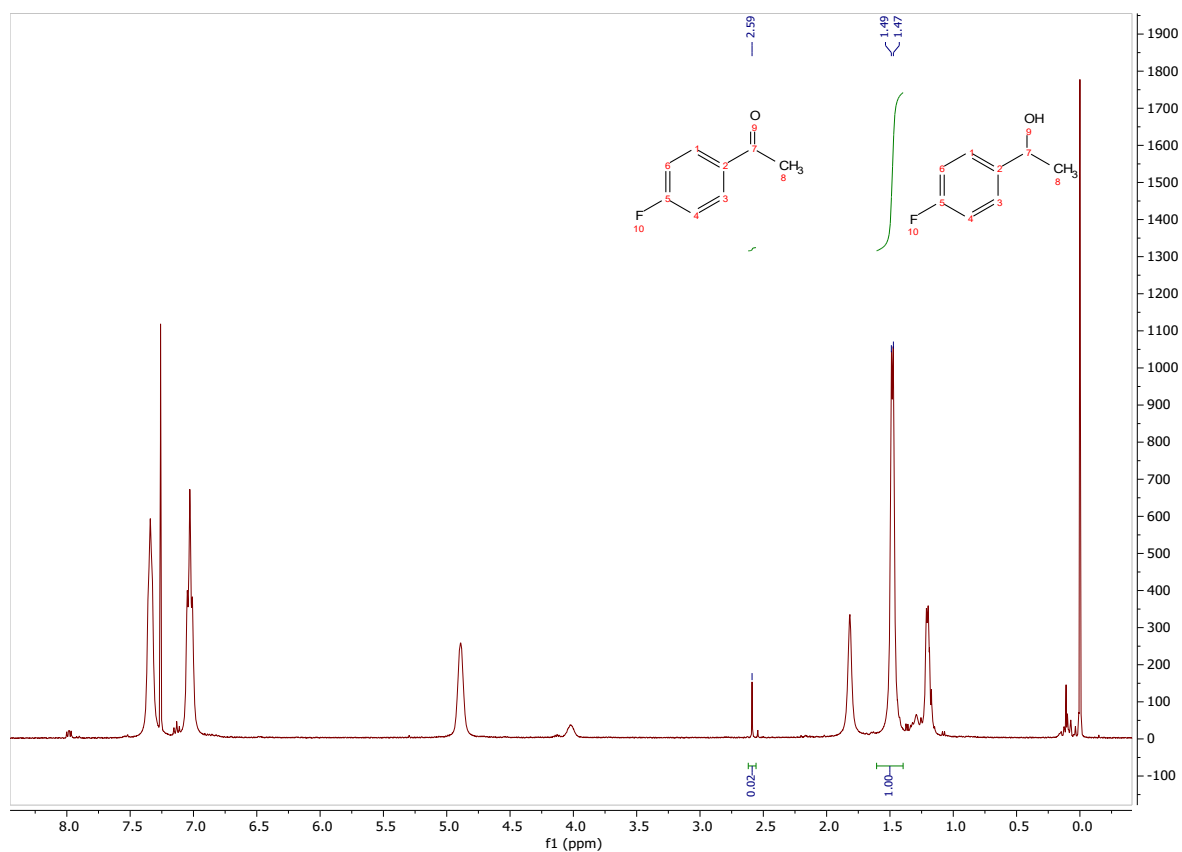

**Figure S43**  $^1\text{H}$  NMR spectrum of reaction mixture following the TH of 4-fluoro-acetophenone (**1d**) to 4-fluoro-phenyl-ethan-(2)-ol (**2d**) using **Mn1d** as (pre)catalyst

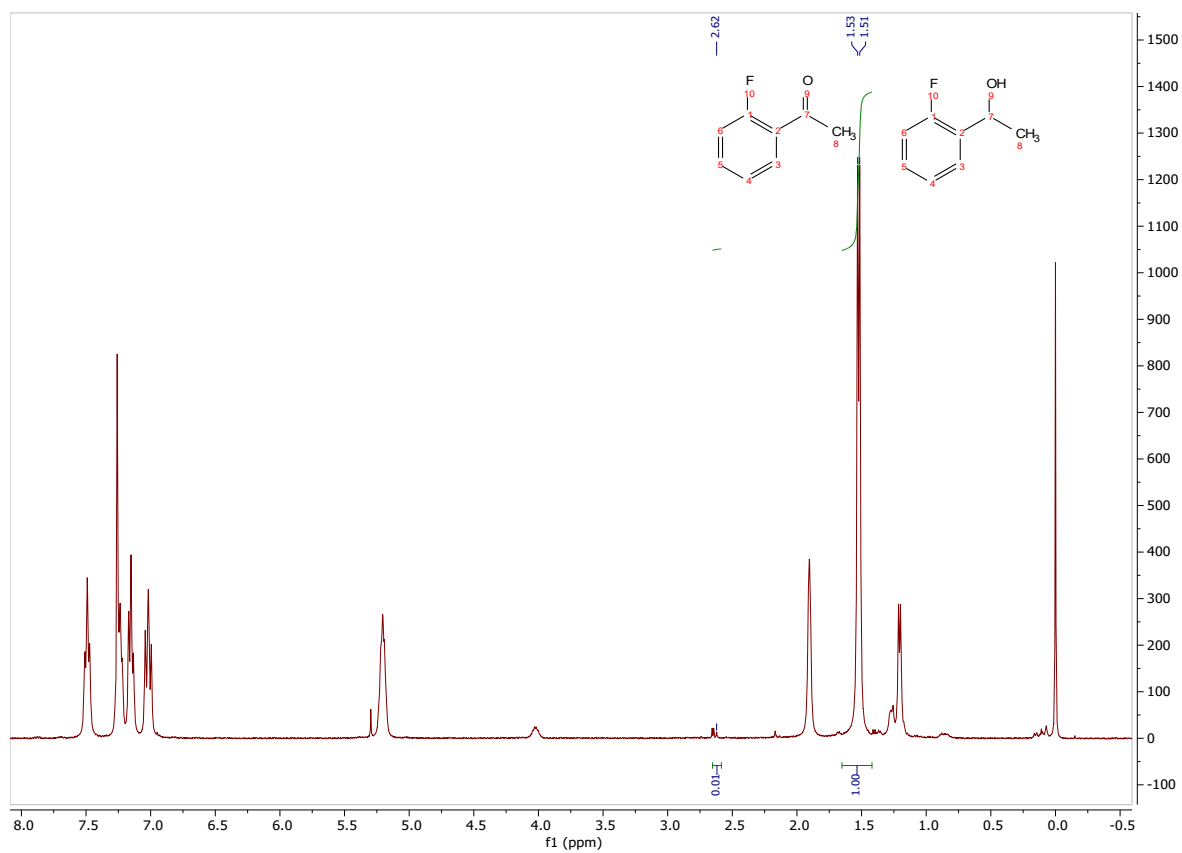

**Figure S44**  $^1\text{H}$  NMR spectrum of reaction mixture following the TH of 2-fluoro-acetophenone (**1e**) to 2-fluoro-phenyl-ethan-(2)-ol (**2e**) using **Mn1d** as (pre)catalyst

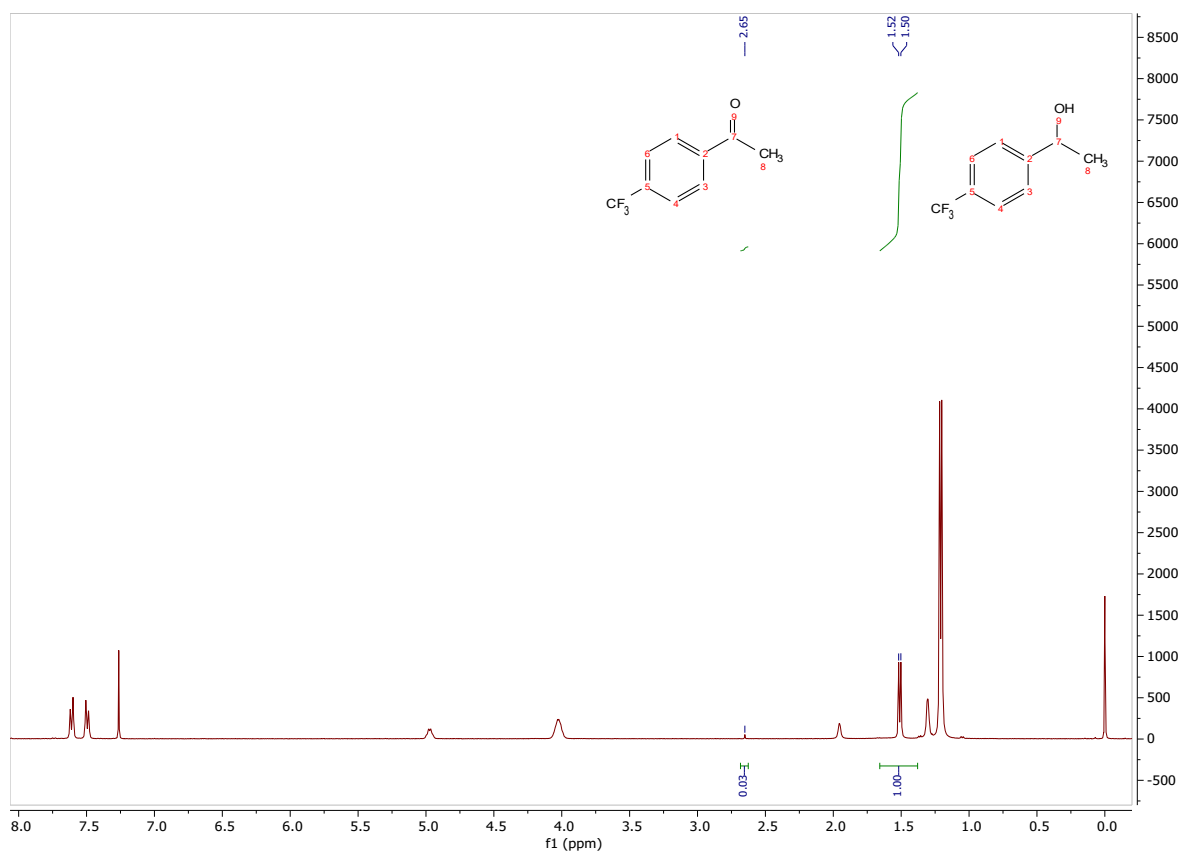

**Figure S45** <sup>1</sup>H NMR spectrum of reaction mixture following the TH of 4-(trifluoromethyl)-acetophenone (**1f**) to 4-(trifluoromethyl)-phenyl-ethan-(2)-ol (**2f**) using **Mn1d** as (pre)catalyst

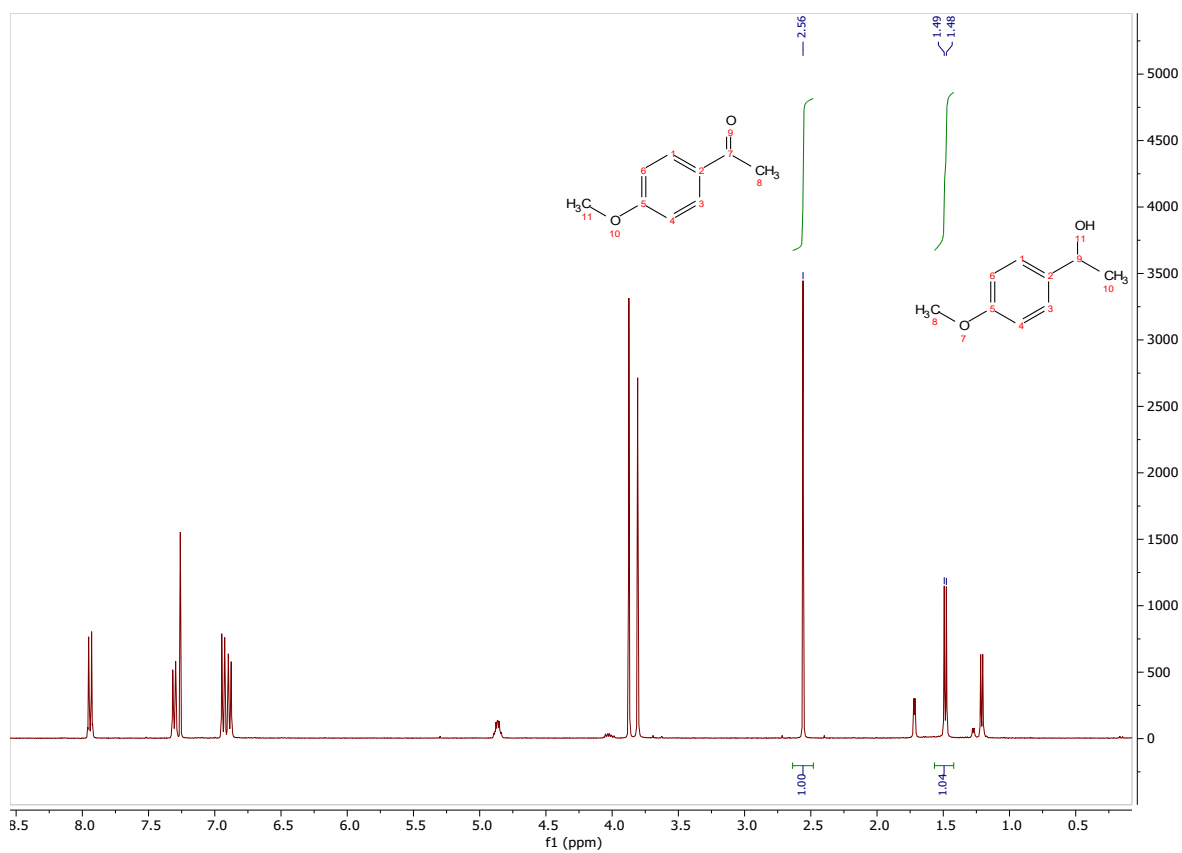

**Figure S46** <sup>1</sup>H NMR spectrum of reaction mixture following the TH of 4-methoxy-acetophenone (**1g**) to 4-methoxy-phenyl-ethan-(2)-ol (**2g**) using **Mn1d** as (pre)catalyst

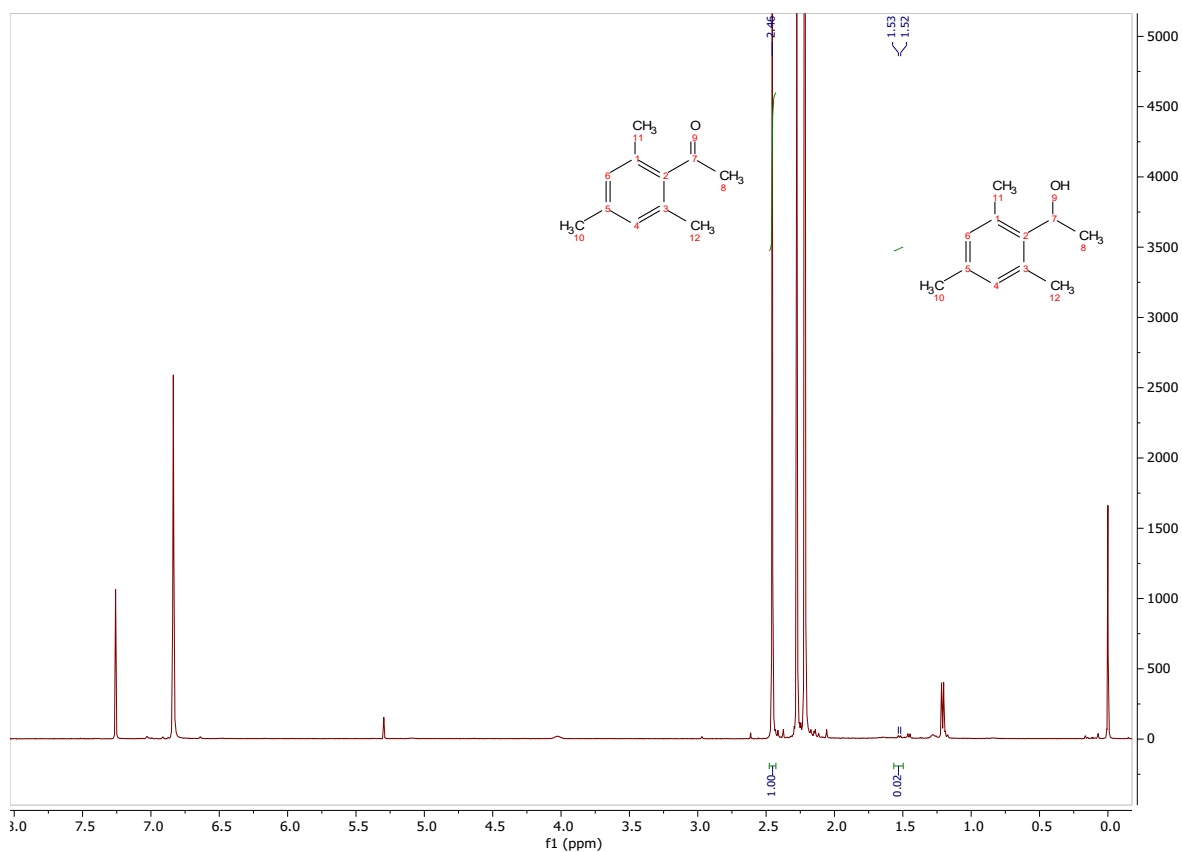

**Figure S47** <sup>1</sup>H NMR spectrum of reaction mixture following the TH of 2,4,6-trimethyl-acetophenone (**1h**) to 2,4,6-trimethyl-phenyl-ethan-(2)-ol (**2h**) using **Mn1d** as (pre)catalyst

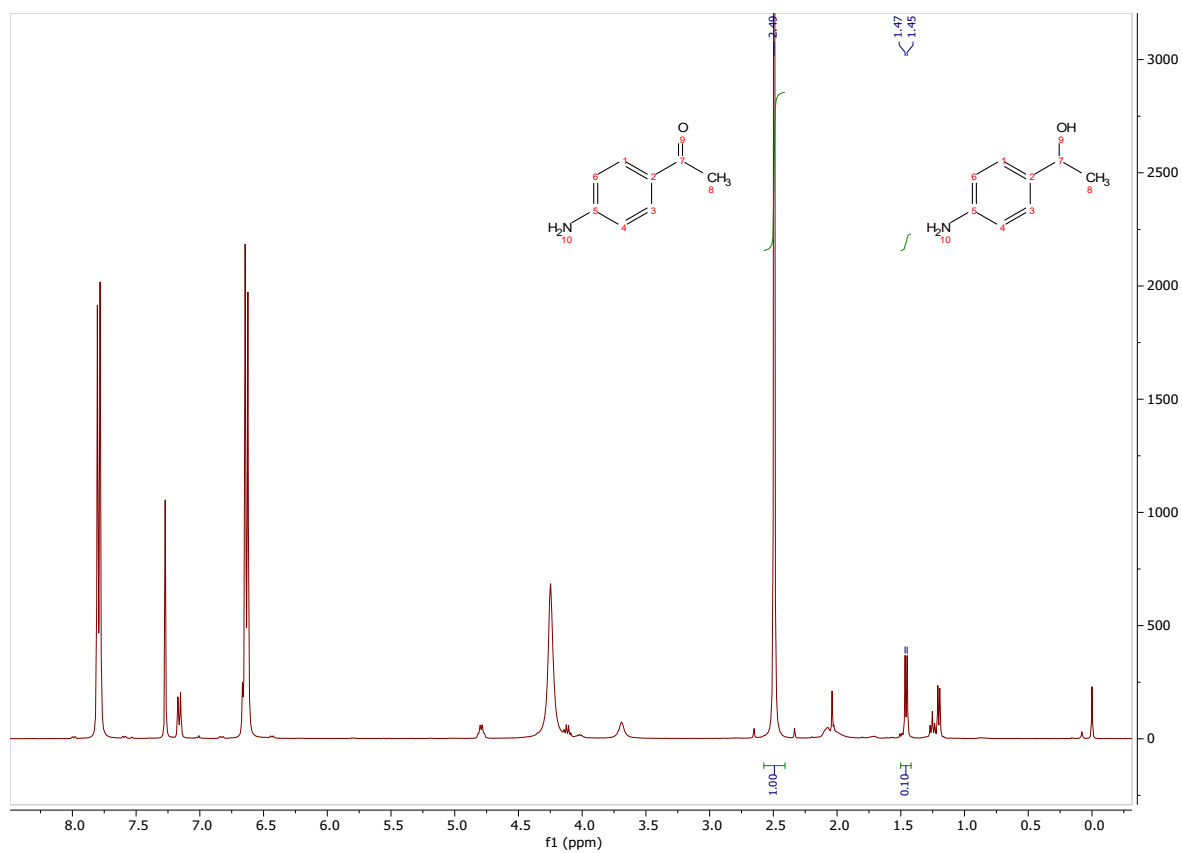

**Figure S48** <sup>1</sup>H NMR spectrum of reaction mixture following the TH of 4-amino-acetophenone (**1i**) to 4-amino-phenyl-ethan-(2)-ol (**2i**) using **Mn1d** as (pre)catalyst

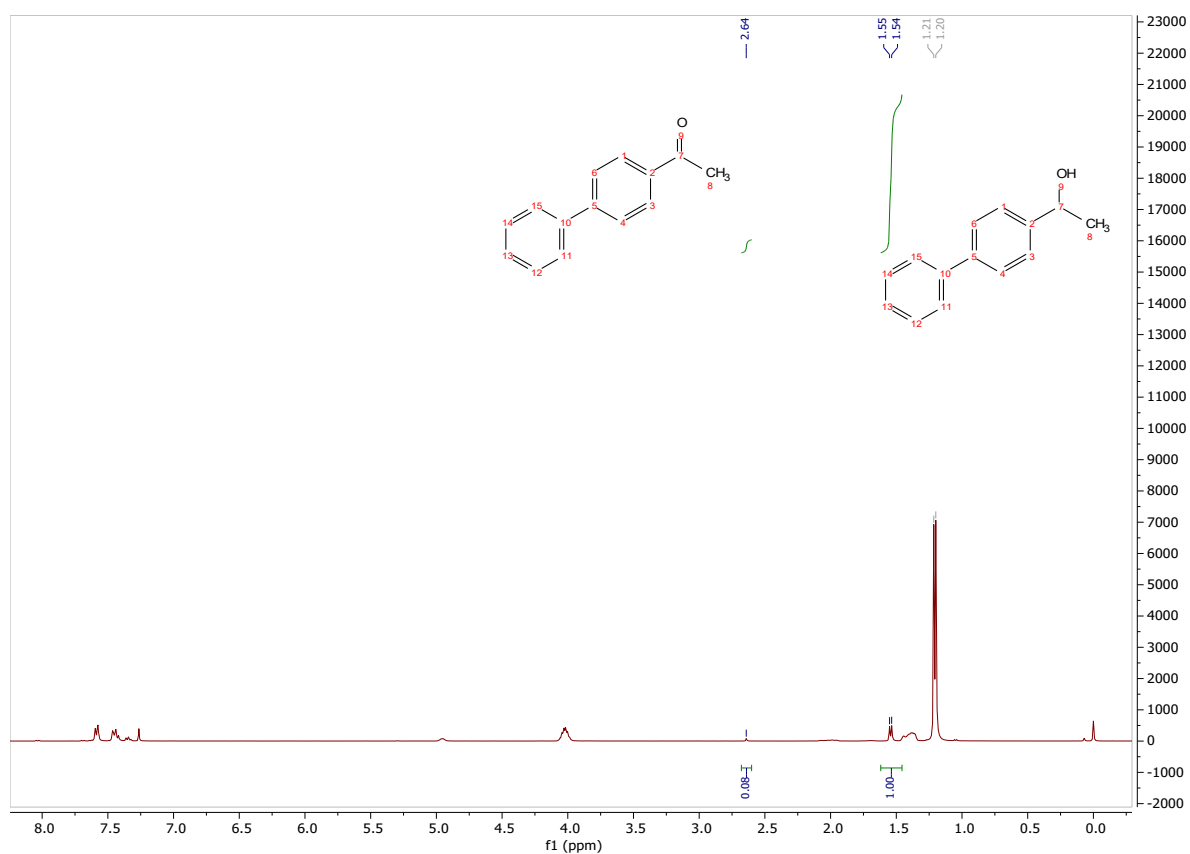

**Figure S49**  $^1\text{H}$  NMR spectrum of reaction mixture following the TH of 4-phenyl-acetophenone (**1j**) to biphenyl-4-ethan-(2)-ol (**2j**) using **Mn1d** as (pre)catalyst

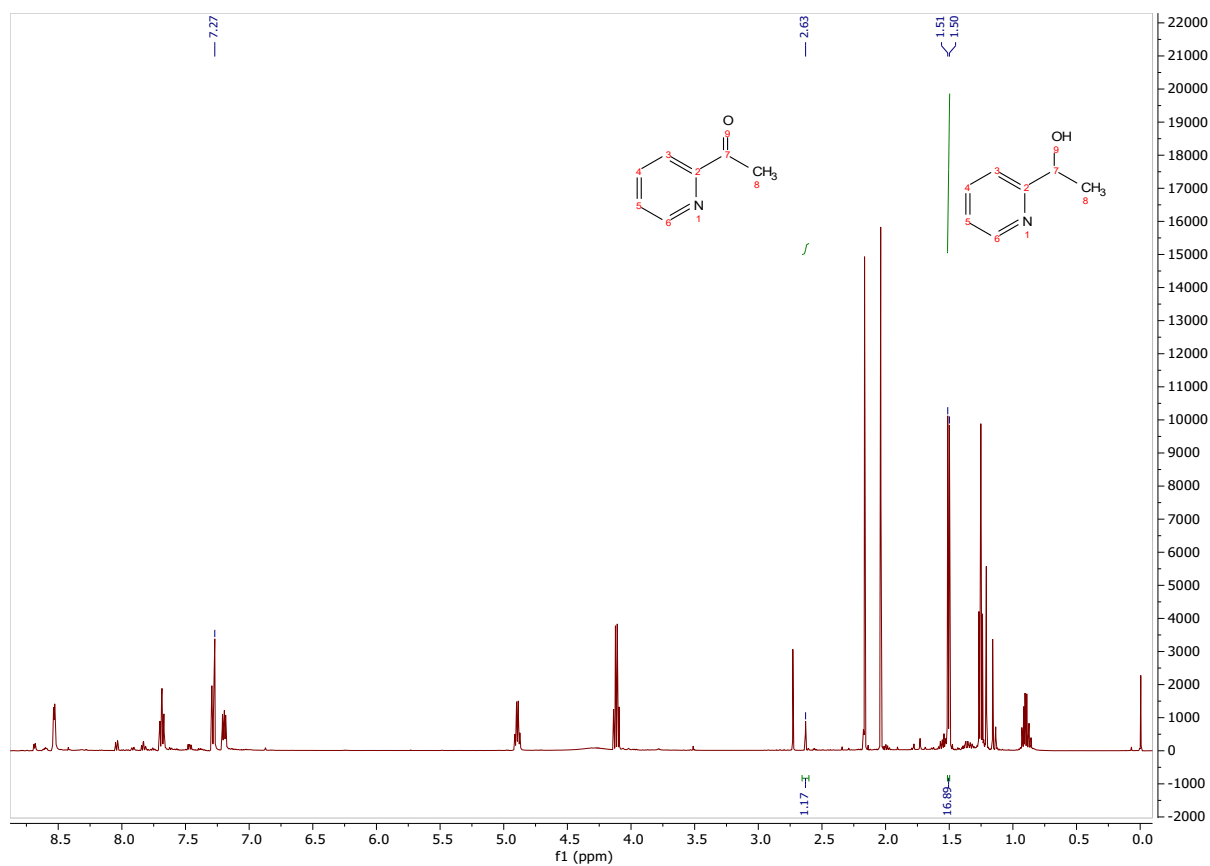

**Figure S50**  $^1\text{H}$  NMR spectrum of reaction mixture following the TH of 2-acetyl-pyridine (**1k**) to pyridine-2-ethan-(2)-ol (**2k**) using **Mn1d** as (pre)catalyst

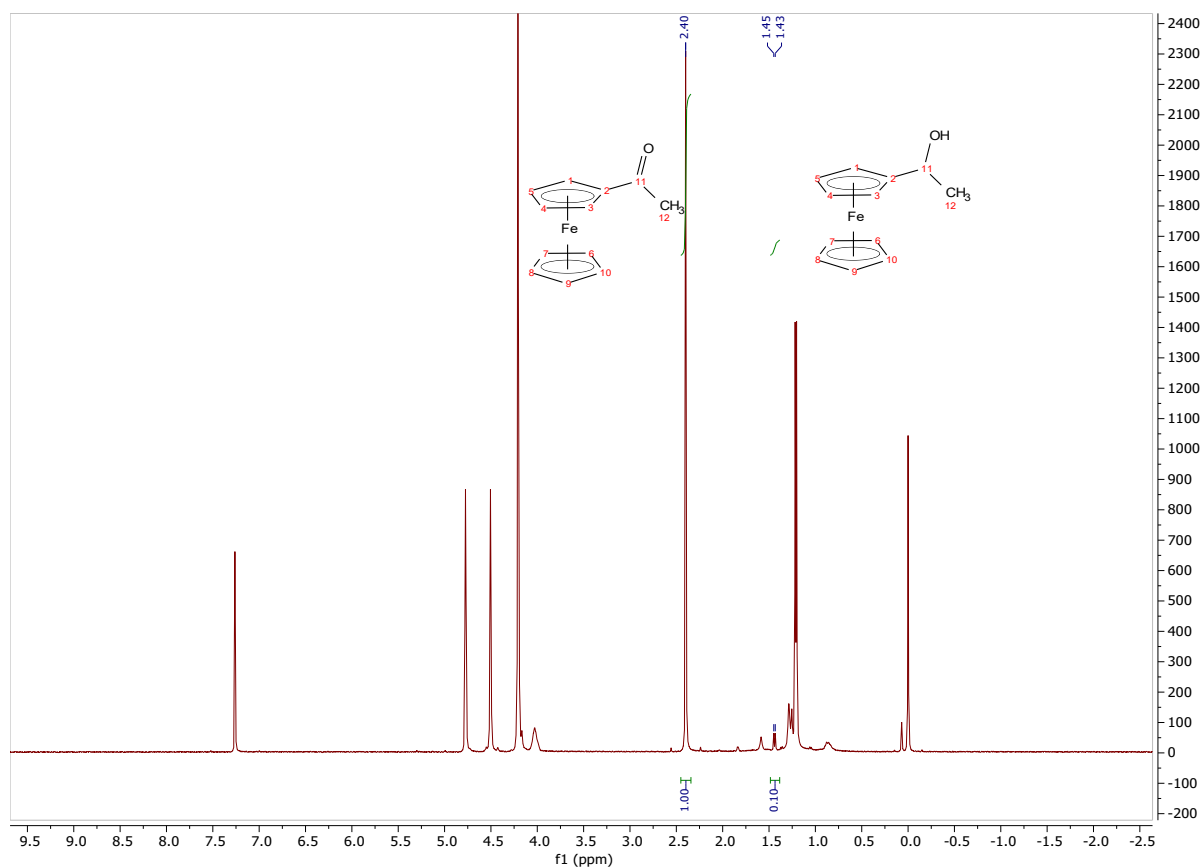

**Figure S51** <sup>1</sup>H NMR spectrum of reaction mixture following the TH of acetyl ferrocene (**11**) to 1-ferrocenylethanol (**21**) using **Mn1d** as (pre)catalyst

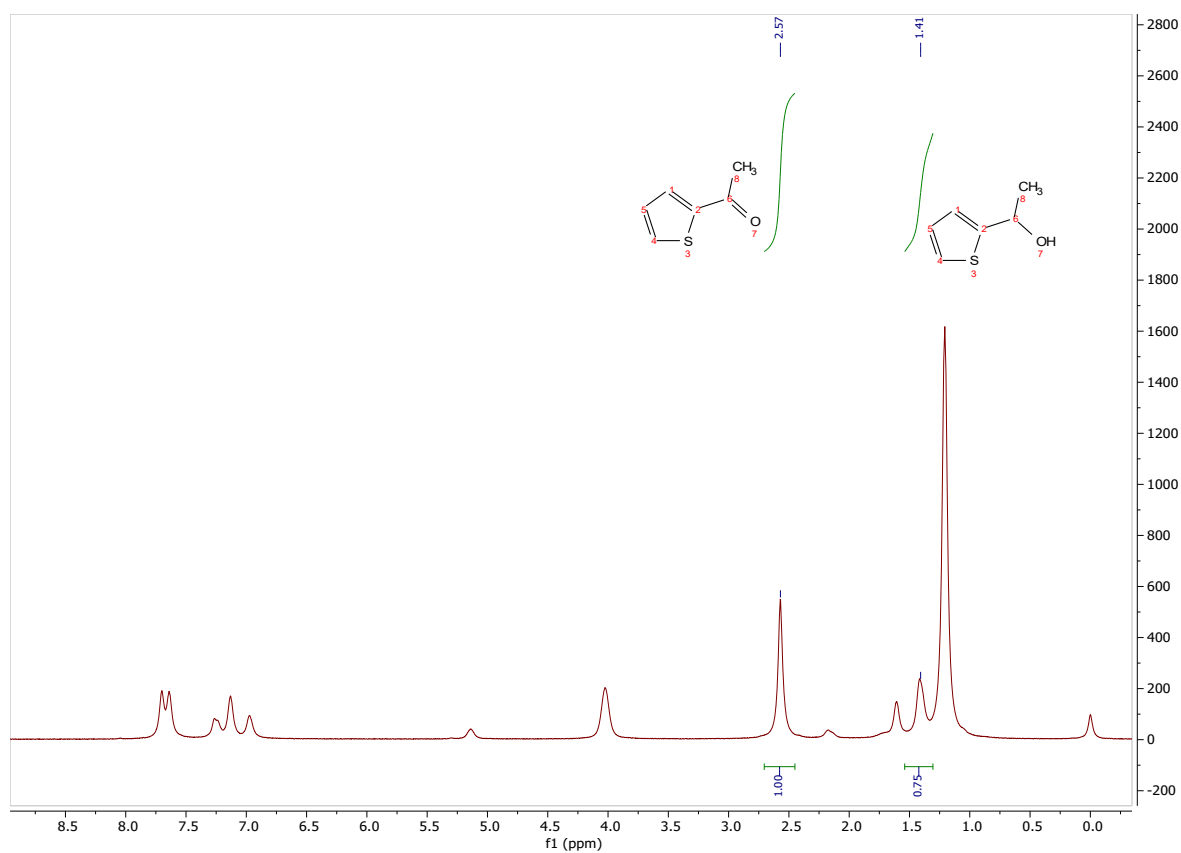

**Figure S52** <sup>1</sup>H NMR spectrum of reaction mixture following the TH of 2-acetyl-thiophene (**1n**) to thiophene-2-ethan(2)-ol (**2n**) using **Mn1d** as (pre)catalyst

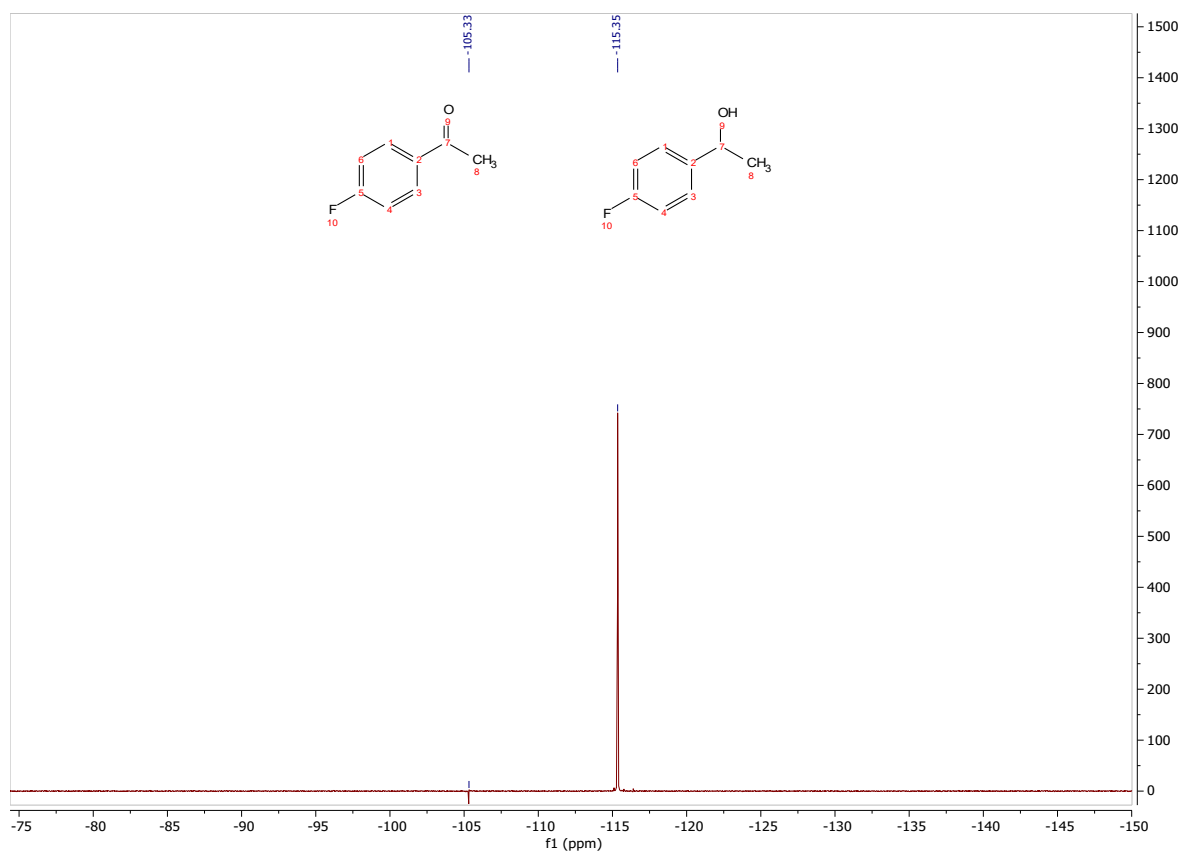

**Figure S53**  $^{19}\text{F}\{^1\text{H}\}$  NMR spectrum of reaction mixture following the TH 2-fluoro-acetophenone (**1d**) to 2-fluoro-phenyl-ethan-(2)-ol (**2d**) using **Mn1d** as (pre)catalyst

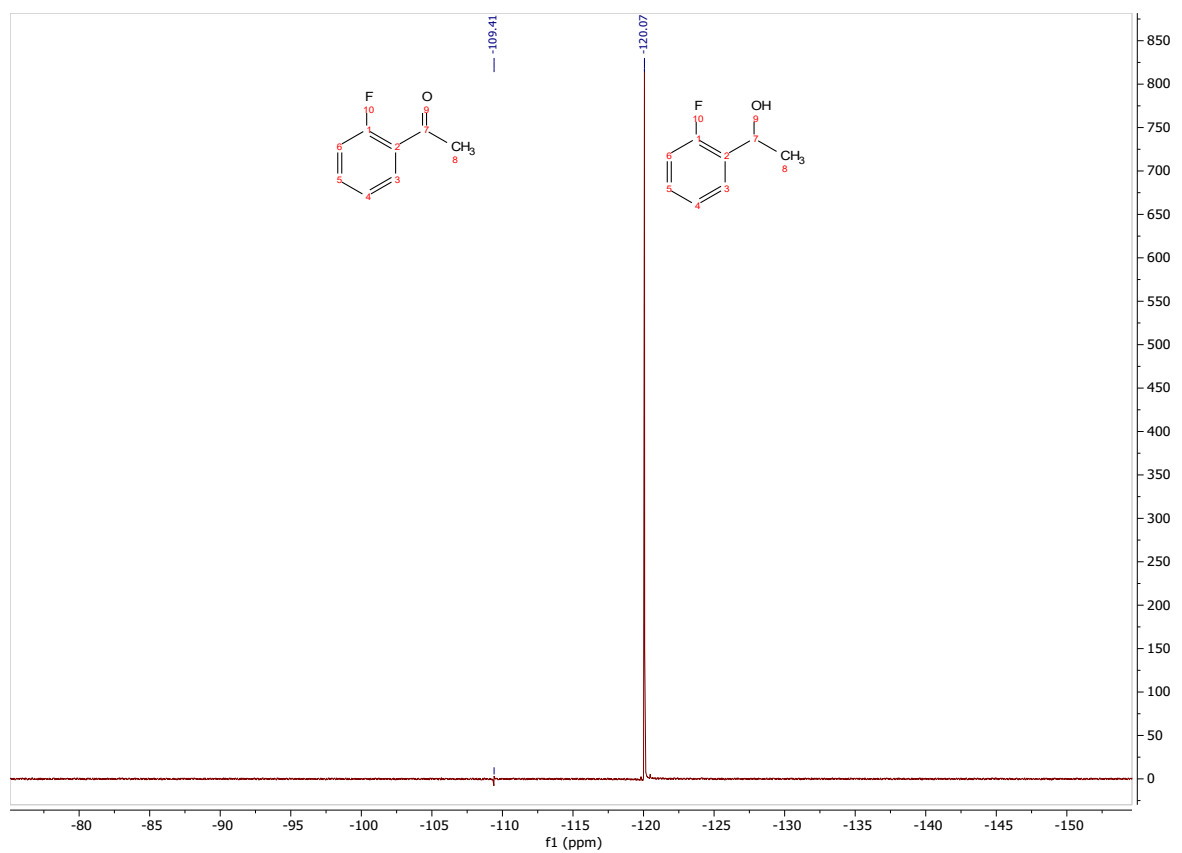

**Figure S54**  $^{19}\text{F}\{^1\text{H}\}$  NMR spectrum of reaction mixture following the TH conversion of 2-fluoro-acetophenone (**1e**) to 2-fluoro-phenyl-ethan-(2)-ol (**2e**) using **Mn1d** as (pre)catalyst

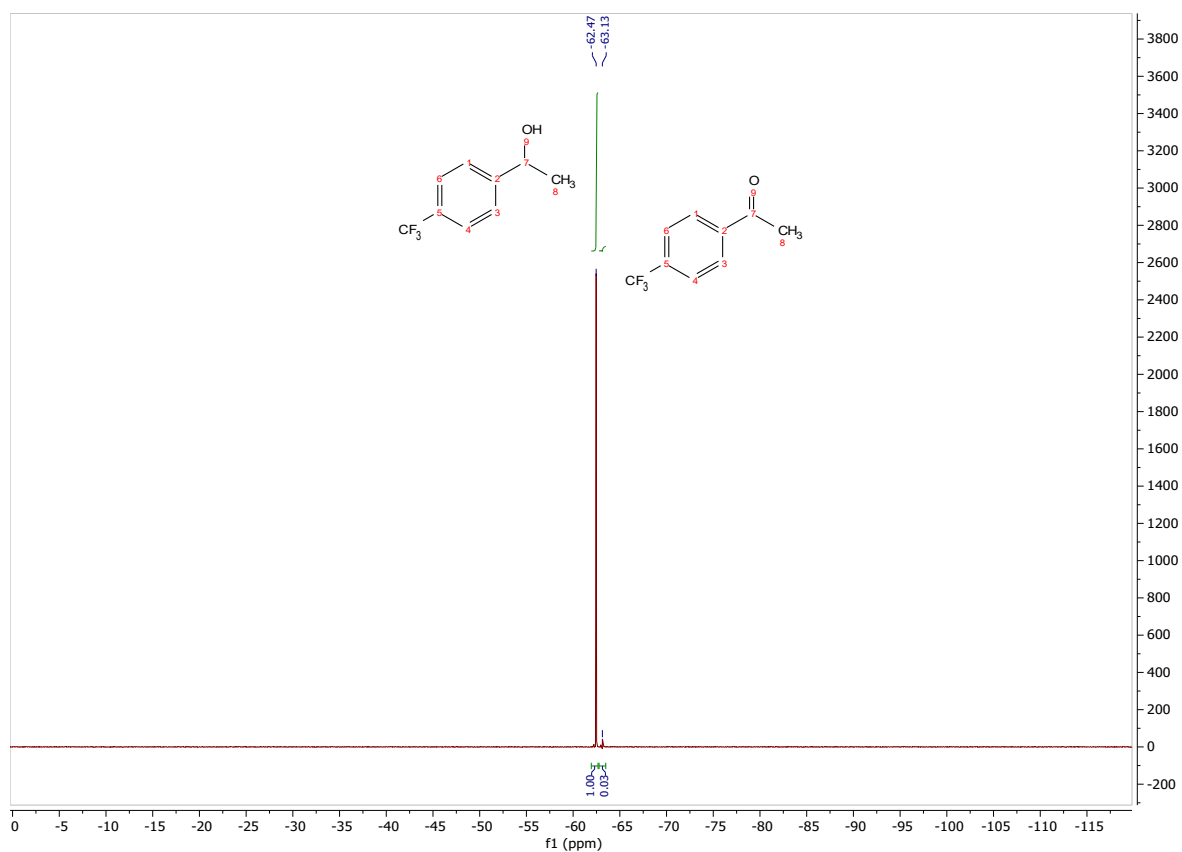

**Figure S55**  $^{19}\text{F}\{^1\text{H}\}$  NMR spectrum of reaction mixture following the TH of 4-(trifluoromethyl)acetophenone (**1f**) to 4-(trifluoromethyl)-phenyl-ethan-(2)-ol (**2f**) using **Mn1d** as (pre)catalyst

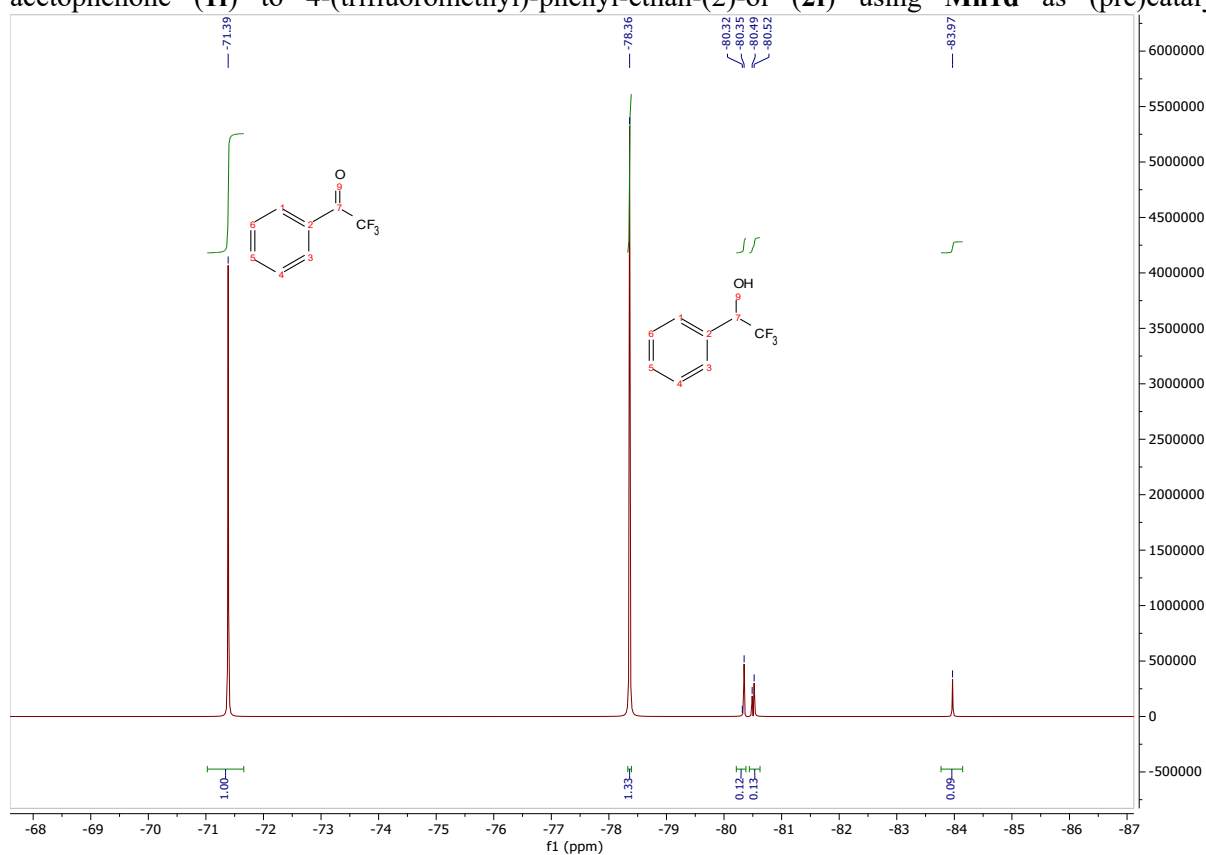

**Figure S56**  $^{19}\text{F}\{^1\text{H}\}$  NMR spectrum of reaction mixture following the TH of 2,2,2-trifluoro-1-phenylethan-1-one (**1m**) to 2,2,2-trifluoro-1-phenylethan-1-ol (**2m**) using **Mn1d** as (pre)catalyst

## 7. SambVca Buried Volume Calculations (%V<sub>bur</sub>)

The topographic steric maps of the (*N,N*)Mn(CO)<sub>3</sub> or (*N,O*)Mn(CO)<sub>3</sub> fragments in **Mn1a**, **Mn1b**, **Mn1c**, **Mn1d**, **Mn1e** and **Mn2** showing the buried volume ( $V_{bur}$ ) around the catalytic centre. Map radius set to 5 Å, bromine atom removed with positional representation of molecules orientation. %V<sub>bur</sub> corresponds to percentage of volume occupied by the molecule in each quadrant [SW (south west), NW (north west), NE (north east) and SE (south east)].<sup>8</sup>

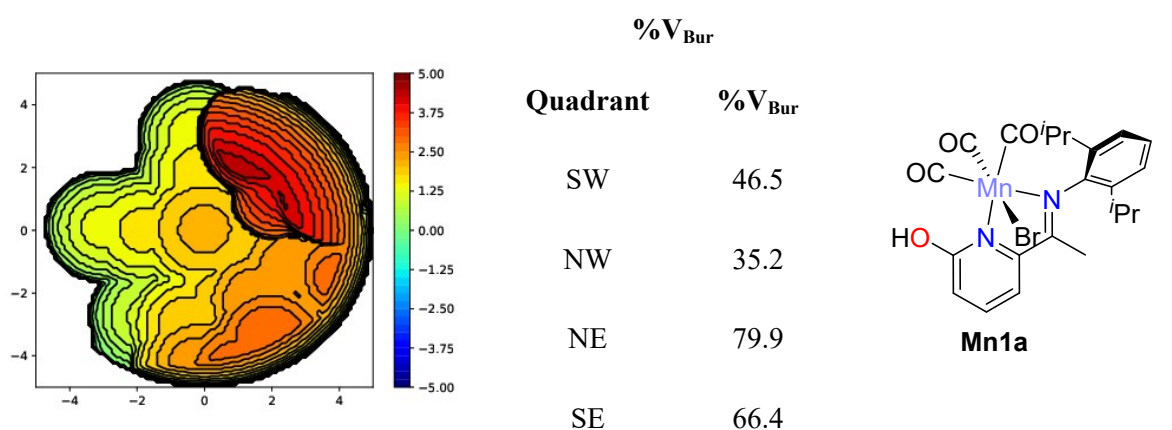

**Figure S57** SambVca plot showing the buried volume ( $V_{bur}$ ) around the manganese centre of **Mn1a**. Map radius set to 5 Å, bromine atom removed with positional representation of molecules orientation.

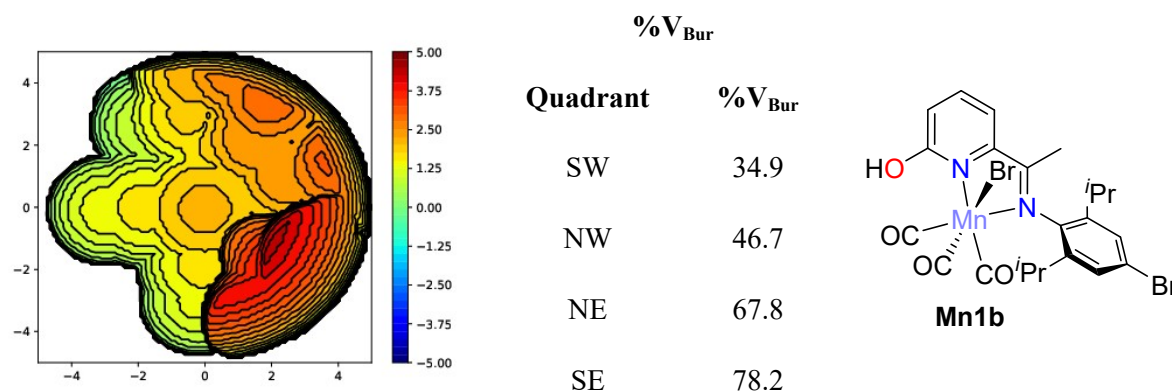

**Figure S58** SambVca plot showing the buried volume ( $V_{bur}$ ) around the manganese centre of **Mn1b**. Map radius set to 5 Å, bromine atom removed with positional representation of molecules orientation.

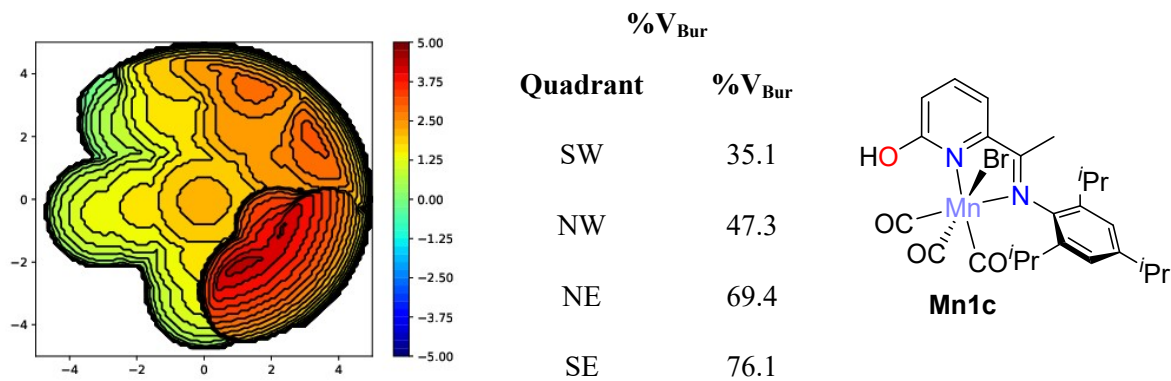

**Figure S59** SambVca plot showing the buried volume ( $V_{bur}$ ) around the manganese centre of **Mn1c**. Map radius set to 5 Å, bromine atom removed with positional representation of molecules orientation.

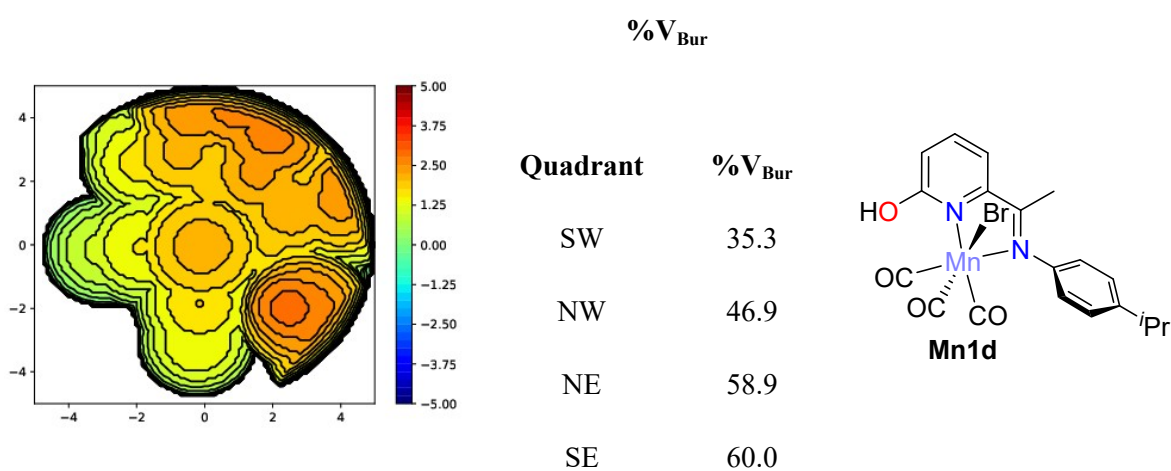

**Figure S60** SambVca plot showing the buried volume ( $V_{bur}$ ) around the manganese centre of **Mn1d**. Map radius set to 5 Å, bromine atom removed with positional representation of molecules orientation.

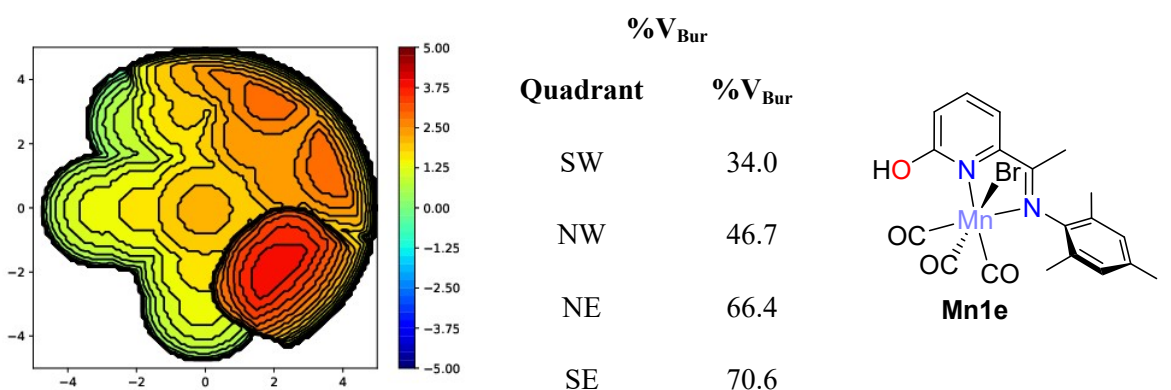

**Figure S61** SambVca plot showing the buried volume ( $V_{bur}$ ) around the manganese centre of **Mn1e**. Map radius set to 5 Å, bromine atom removed with positional representation of molecules orientation.

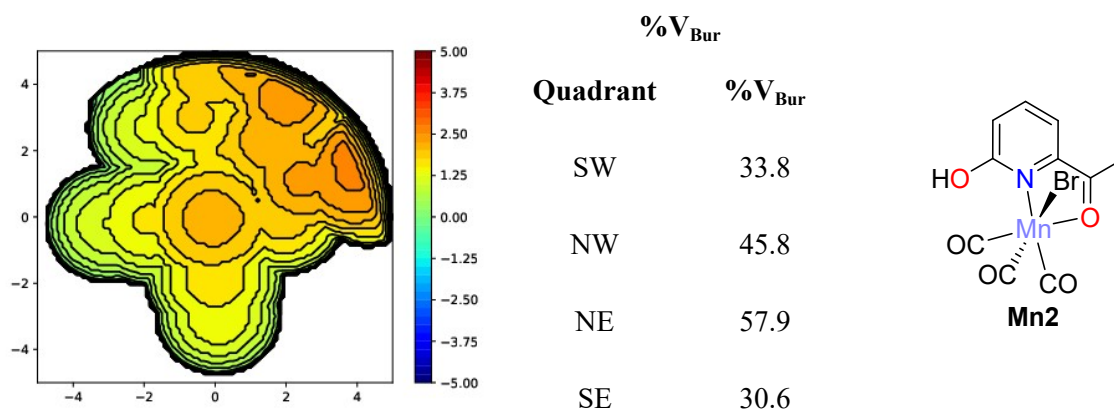

**Figure S62** SambVca plot showing the buried volume ( $V_{bur}$ ) around the manganese centre of **Mn2**. Map radius set to 5 Å, bromine atom removed with positional representation of molecules orientation.

## 7. Crystallographic studies

### 7.1 Molecular structures of Mn1a, Mn1b, Mn1c, Mn1d, Mn1e and Mn2

Crystals of **Mn1a**, **Mn1b**, **Mn1c**, **Mn1d**, **Mn1e** and **Mn2** suitable for single crystal X-ray diffraction studies were grown through slow evaporation of a concentrated methanol solution.

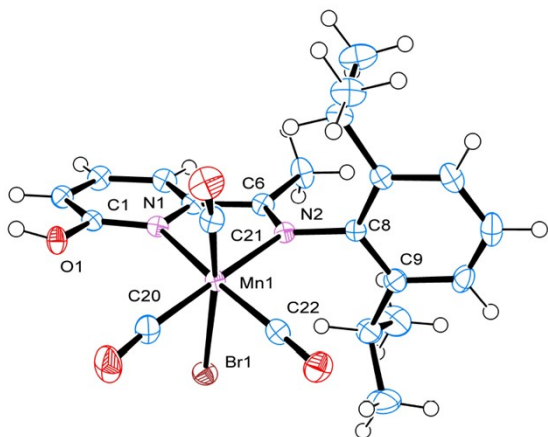

**Figure S63a** ORTEP representation of **Mn1a** with thermal ellipsoids set to 50% probability. Selected bond distances (Å): Br1 - Mn1 2.5377(4), Mn1 - N1 2.0746(19), Mn1 - N2 2.059(2), Mn1 - C20 1.829(3), Mn1 - C21 1.787(3), Mn1 - C22 1.805(2), O1 - C1 1.337(3), N2 - C6 1.287(3). Selected bond angles (°): N1 - Mn1 - Br1 85.94(5), N2 - Mn1 - Br1 92.40(5), N2 - Mn1 - N1 77.65(8), C21 - Mn1 - Br1 169.76(8). Selected torsion angle (°): Mn1 - N2 - C8 - C9: 89.9(2).

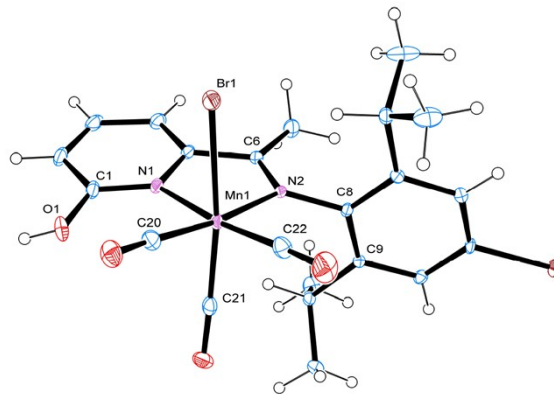

**Figure S63b** ORTEP representation of **Mn1b** with thermal ellipsoids set to 50% probability. Br1 - Mn1 2.5540(4), Mn1 - N1 2.0555(18), Mn1 - N2 2.0564(17), Mn1 - C20 1.825(2), Mn1 - C21 1.794(2), Mn1 - C22 1.804(3), O1 - C1 1.328(3), N2 - C6 1.295(3). Selected bond angles (°): N1 - Mn1 - Br1 85.48(5), N2 - Mn1 - Br1 91.32(5), N2 - Mn1 - N1 77.77(8), C21 - Mn1 - Br1 170.53(8). Selected torsion angle (°): Mn1 - N2 - C8 - C9: 94.9(7).

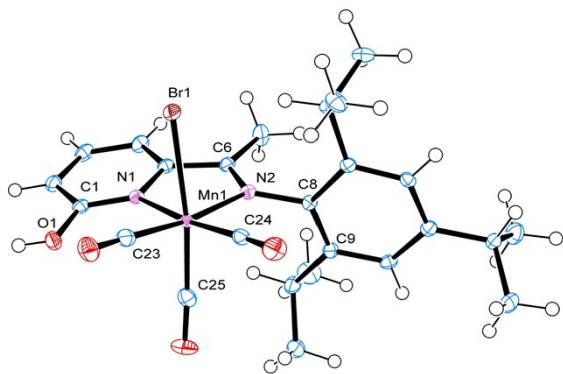

**Figure S63c** ORTEP representation of **Mn1c** with thermal ellipsoids set to 50% probability. Selected bond distances (Å): Br1 - Mn1 2.5538(6), Mn1 - N1 2.064(3), Mn1 - N2 2.069(3), Mn1 - C23 1.816(4), Mn1 - C24 1.818(4), Mn1 - C25 1.797(4), O1 - C1 1.330(5), N2 - C6 1.285(5). Selected bond angles (°): N1 - Mn1 - Br1 86.10(8), N2 - Mn1 - Br1 90.05(9), N2 - Mn1 - N1 78.06(8), C25 - Mn1 - Br1 171.40(8). Selected torsion angle (°): Mn1 - N2 - C8 - C9: 94.3(3).

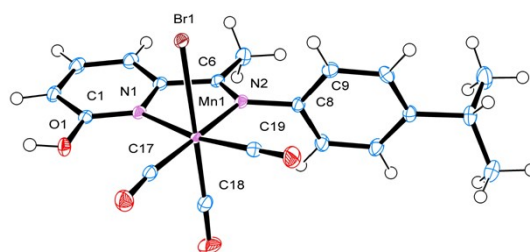

**Figure S63d** ORTEP representation of **Mn1d** with thermal ellipsoids set to 50% probability. Selected bond distances (Å): Br1 - Mn1 2.5470(3), Mn1 - N1 2.0736(14), Mn1 - N2 2.0300(14), Mn1 - C17 1.8277(18), Mn1 - C18 1.7971(18), Mn1 - C19 1.8094(17), O1 - C1 1.338(2), N2 - C6 1.288(2). Selected bond angles (°): N(1)-Mn(1)-Br(1) 84.57(4), N(2)-Mn(1)-N(1) 77.69(5), C(18)-Mn(1)-Br(1), 179.64(6). Selected torsion angle (°): Mn1 - N2 - C8 - C9: 80.83(17).

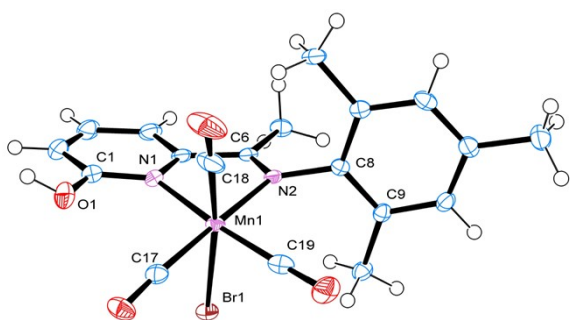

**Figure S63e** ORTEP representation of **Mn1e** with thermal ellipsoids set to 50% probability. Selected bond distances (Å): Br1 - Mn1 2.5590(6), Mn1 - N1 2.059(3), Mn1 - N2 2.047(3), Mn1 - C17 1.827(4), Mn1 - C18 1.809(4), Mn1 - C19 1.793(4), O1 - C1 1.326(5), N2 - C6 1.291(4). Selected bond angles (°): N1 - Mn1 - Br1 85.30(8), N2 - Mn1 - Br1 90.45(8), N2 - Mn1 - N1 77.73(11), C18 - Mn1 - Br1 171.56(12). Selected torsion angle (°): Mn1 - N2 - C8 - C9: 83.1(3).

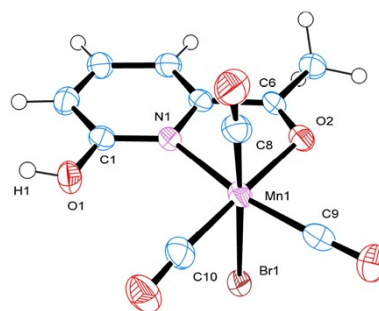

**Figure S63f** ORTEP representation of **Mn2** with thermal ellipsoids set to 50% probability. Selected bond distances (Å): Br1 - Mn1 2.5477(9), Mn1 - N1 2.091(4), Mn1 - O2 2.033(4), Mn1 - C8 1.805(5), Mn1 - C9 1.806(6), Mn1 - C10 1.808(6), O1 - C1 1.337(6), O2 - C6 1.234(6). Selected bond angles (°): N1 - Mn1 - Br1 88.09(11), O2 - Mn1 - Br1 87.24(10), O2 - Mn1 - N1 77.51(15), C8 - Mn1 - Br1 176.76(18),

## 7.2 Molecular structures of Mn1b' and Mn1d'

Crystals of **Mn1b'** suitable for single crystal X-ray diffraction were grown by slow diffusion of dichloromethane and hexane, while those for **Mn1d'** were formed through vapour diffusion of diethyl ether into DMF. For **Mn1d'**, there is disorder between CO and Br above and below the *N,N*-coordination plane: this has been modelled for C(18)O(3):Br(1A) as 92:8.

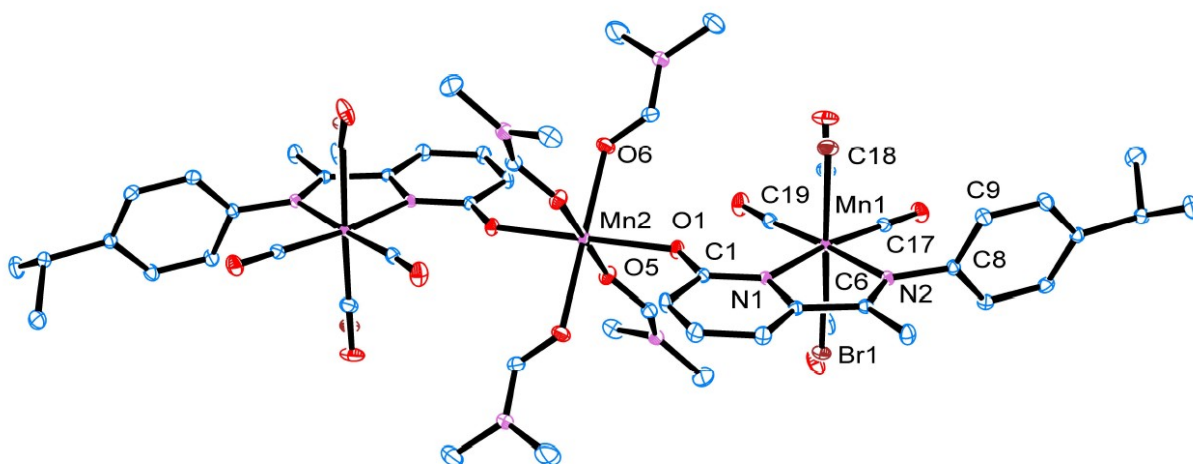

**Figure S64a** ORTEP representation of **Mn1d'** with thermal ellipsoids set to 50% probability. 'Half' of the molecule has been generated by symmetry, symmetry operation  $-x, -y+1, -z+1$ . Selected bond distances (Å): Br(1) - Mn(1) 2.5295(4), Mn(1) - N(1) 2.0535(16), Mn(1) - N(2), 2.0332(16) C(1) - O(1) 1.274(2), O(1) - Mn(2) 2.1485(14). Selected bond angles (°): N(1) - Mn(1) - Br(1) 86.57 (4), N(2)-Mn(1) - N(1) 77.91(6), C(18) - Mn(1) - Br(1), 178.36(11), O(5) - Mn(2) - O(6) 92.31(5).

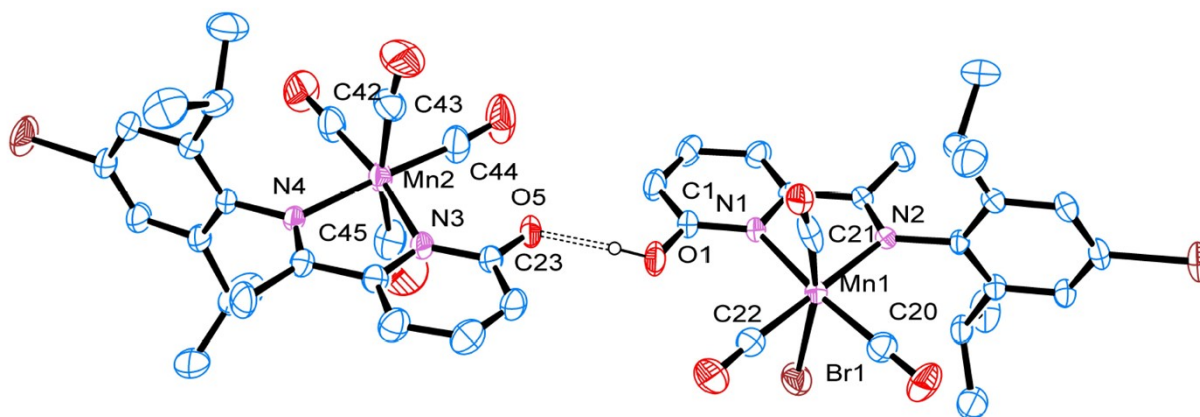

**Figure S64b** ORTEP representation of **Mn1b'** with the thermal ellipsoids set to 50% probability. All protons except for H1 have been removed for clarity. Selected bond distances (Å): Mn(1) – N(1) 2.053(4), Mn(1) – N(2) 2.071(4), Mn(1) – Br(1) 2.5343(11), Mn(1) – C(20) 1.815(6), Mn(1) – C(21) 1.813(8), Mn(1) – C(22) 1.805(6), C(1) – O(1) 1.323(7), Mn(2) – N(3) 2.081(4), Mn(2) – N(4) 2.078(4), Mn(2) – C(42) 1.805(7), Mn(2) – C(43) 1.859(8), Mn(2) – C(44) 1.799(7), Mn(2) – C(45) 1.854(9), C(23) – O(5) 1.266(7). Selected Bond angles (°): N(2) – Mn(1) – N(1) 77.67(15), C(21) – Mn(1) – Br(1) 166.73(19), N(3) – Mn(2) – N(4) 76.83(17), C(45) – Mn(2) – C(43) 167.2(3).

### 7.3 Molecular structures of HL1a and HL1b

Crystals of **HL1a** and **HL1e** suitable for single crystal XRD were grown by standing in methanol solutions for 2 days.

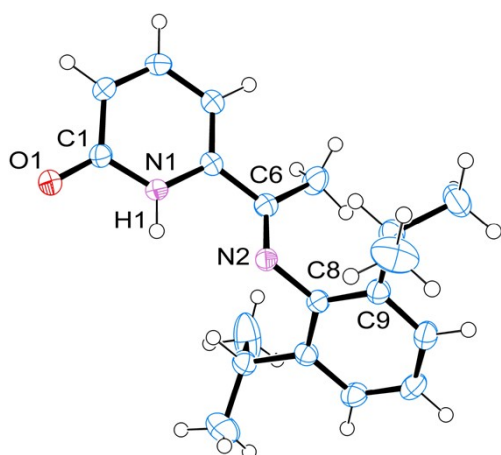

**Figure S65a** ORTEP representation of **HL1a** with thermal ellipsoids set to 50% probability. Selected bond distances (Å): O1 – C1 1.241(2), N2 – C6 1.276(2), N2 – C8 1.423(2). Selected bond angles (°): C6 – N2 – C8 120.79(14), O1 – C1 – N1 121.18(10). Selected torsion angle (°): C6 – N2 – C8 – C9 73.1(2).

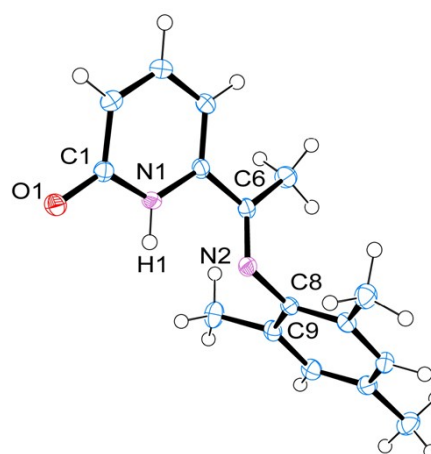

**Figure S65b** ORTEP representation of **HL1e** with thermal ellipsoids set to 50% probability. Selected bond distances (Å): O1 – C1 1.2450(13), N2 – C6 1.2768(2), N2 – C8 1.4215(14). Selected bond angles (°): C6 – N2 – C8 120.39(9), O1 – C1 – N1 120.49(10). Selected torsion angle (°): C6 – N2 – C8 – C9 – 87.42(13).

## 7.4 Crystallographic parameters

Data was collected using a Bruker D8 Quest diffractometer with a Photon III detector and a microfocus source with Cu-K $\alpha$  radiation ( $\lambda = 1.54178$ ) or a Bruker APEX 2000 CCD diffractometer graphite-monochromated Mo-K $\alpha$  radiation ( $\lambda = 0.71073$ ). Intensities were integrated from data recorded on 1° frames by  $\omega$  or  $\phi$  rotation. A multi-scan method absorption correction was applied. The structures were solved using SHELXS or SHELXT the datasets were refined by full-matrix least-squares on reflections with  $F^2 \geq 2\sigma(F^2)$  values, with anisotropic displacement parameters for all nonhydrogen atoms, and with constrained riding hydrogen geometries; Uiso(H) was set at 1.2 (1.5 for methyl groups) times  $U_{eq}$  of the parent atom. SHELX was employed through OLEX2 for structure solution and refinement.<sup>9</sup> The X-ray structure determinations and detailed data are shown in Tables S1 – S4.

**Table S1** Crystal data and structure refinement for **Mn1a**, **Mn1b** and **Mn1c**.

|                                             | <b>Mn1a</b>                                                       | <b>Mn1b</b>                                                                     | <b>Mn1c</b>                                                       |
|---------------------------------------------|-------------------------------------------------------------------|---------------------------------------------------------------------------------|-------------------------------------------------------------------|
| CCDC deposition number                      | 2540706                                                           | 2540707                                                                         | 2540708                                                           |
| Identification code                         | Q24105sp_0m                                                       | Q25004sp_0m                                                                     | Q24087sp_0m                                                       |
| Empirical formula                           | C <sub>23</sub> H <sub>28</sub> BrMnN <sub>2</sub> O <sub>5</sub> | C <sub>23</sub> H <sub>27</sub> Br <sub>2</sub> MnN <sub>2</sub> O <sub>5</sub> | C <sub>26</sub> H <sub>34</sub> BrMnN <sub>2</sub> O <sub>5</sub> |
| Formula weight                              | 547.32                                                            | 626.22                                                                          | 589.40                                                            |
| Temperature/K                               | 120.0                                                             | 120.0                                                                           | 120.0                                                             |
| Crystal system                              | monoclinic                                                        | orthorhombic                                                                    | monoclinic                                                        |
| Space group                                 | P2 <sub>1</sub> /n                                                | Pbca                                                                            | P2 <sub>1</sub> /n                                                |
| a/Å                                         | 9.3579(2)                                                         | 8.6636(3)                                                                       | 8.6029(3)                                                         |
| b/Å                                         | 17.8308(4)                                                        | 15.9084(5)                                                                      | 18.3931(7)                                                        |
| c/Å                                         | 14.6057(3)                                                        | 37.4468(12)                                                                     | 16.9462(6)                                                        |
| $\alpha$ /°                                 | 90                                                                | 90                                                                              | 90                                                                |
| $\beta$ /°                                  | 91.3510(10)                                                       | 90                                                                              | 93.5070(10)                                                       |
| $\gamma$ /°                                 | 90                                                                | 90                                                                              | 90                                                                |
| Volume/Å <sup>3</sup>                       | 2436.41(9)                                                        | 5161.1(3)                                                                       | 2676.44(17)                                                       |
| Z                                           | 4                                                                 | 8                                                                               | 4                                                                 |
| $\rho_{calc}/\text{cm}^3$                   | 1.492                                                             | 1.612                                                                           | 1.463                                                             |
| $\mu/\text{mm}^{-1}$                        | 6.625                                                             | 8.084                                                                           | 6.072                                                             |
| F(000)                                      | 1120.0                                                            | 2512.0                                                                          | 1216.0                                                            |
| Crystal size/mm <sup>3</sup>                | 0.179 × 0.105 × 0.068                                             | 0.248 × 0.206 × 0.077                                                           | 0.427 × 0.361 × 0.094                                             |
| Radiation                                   | CuK $\alpha$ ( $\lambda = 1.54178$ )                              | CuK $\alpha$ ( $\lambda = 1.54178$ )                                            | CuK $\alpha$ ( $\lambda = 1.54178$ )                              |
| 2 $\Theta$ range for data collection/°      | 7.826 to 144.768                                                  | 9.446 to 144.382                                                                | 7.1 to 145.28                                                     |
| Index ranges                                | -11 ≤ h ≤ 11, -22 ≤ k ≤ 19, -17 ≤ l ≤ 18                          | -10 ≤ h ≤ 10, -17 ≤ k ≤ 19, -45 ≤ l ≤ 46                                        | -10 ≤ h ≤ 10, -22 ≤ k ≤ 22, -20 ≤ l ≤ 16                          |
| Reflections collected                       | 28966                                                             | 63063                                                                           | 27553                                                             |
| Independent reflections                     | 4780 [ $R_{int} = 0.0824$ , $R_{sigma} = 0.0463$ ]                | 5087 [ $R_{int} = 0.0493$ , $R_{sigma} = 0.0252$ ]                              | 5202 [ $R_{int} = 0.0494$ , $R_{sigma} = 0.0398$ ]                |
| Data/restraints/parameters                  | 4780/0/297                                                        | 5087/0/306                                                                      | 5202/0/326                                                        |
| Goodness-of-fit on F <sup>2</sup>           | 1.038                                                             | 1.066                                                                           | 1.038                                                             |
| Final R indexes [ $I \geq 2\sigma(I)$ ]     | $R_1 = 0.0346$ ,<br>$wR_2 = 0.0873$                               | $R_1 = 0.0300$ ,<br>$wR_2 = 0.0784$                                             | $R_1 = 0.0633$ ,<br>$wR_2 = 0.1751$                               |
| Final R indexes [all data]                  | $R_1 = 0.0434$ ,<br>$wR_2 = 0.0911$                               | $R_1 = 0.0309$ ,<br>$wR_2 = 0.0792$                                             | $R_1 = 0.0648$ ,<br>$wR_2 = 0.1780$                               |
| Largest diff. peak/hole / e Å <sup>-3</sup> | 0.76/-1.18                                                        | 0.85/-0.56                                                                      | 1.94/-1.55                                                        |

**Table S2** Crystal data and structure refinement for **Mn1d**, **Mn1e** and **Mn2**.

|                                             | <b>Mn1d</b>                                                       | <b>Mn1e</b>                                                       | <b>Mn2</b>                                                    |
|---------------------------------------------|-------------------------------------------------------------------|-------------------------------------------------------------------|---------------------------------------------------------------|
| CCDC deposition number                      | 2540709                                                           | 2540710                                                           | 2540711                                                       |
| Identification code                         | Q24078sp_0m                                                       | Q24098sp_0m                                                       | Q24092sp_0m                                                   |
| Empirical formula                           | C <sub>19</sub> H <sub>18</sub> BrMnN <sub>2</sub> O <sub>4</sub> | C <sub>20</sub> H <sub>22</sub> BrMnN <sub>2</sub> O <sub>5</sub> | C <sub>10</sub> H <sub>7</sub> BrMnNO <sub>9</sub>            |
| Formula weight                              | 473.20                                                            | 505.24                                                            | 356.02                                                        |
| Temperature/K                               | 120.0                                                             | 120.0                                                             | 120.0                                                         |
| Crystal system                              | monoclinic                                                        | monoclinic                                                        | triclinic                                                     |
| Space group                                 | P2 <sub>1</sub> /c                                                | P2 <sub>1</sub> /n                                                | P-1                                                           |
| a/Å                                         | 9.6305(3)                                                         | 13.9705(5)                                                        | 7.1382(5)                                                     |
| b/Å                                         | 16.9692(6)                                                        | 8.0848(3)                                                         | 8.0945(6)                                                     |
| c/Å                                         | 12.3406(4)                                                        | 19.7580(7)                                                        | 10.6095(8)                                                    |
| α/°                                         | 90                                                                | 90                                                                | 93.792(4)                                                     |
| β/°                                         | 108.1300(10)                                                      | 103.6660(10)                                                      | 90.167(4)                                                     |
| γ/°                                         | 90                                                                | 90                                                                | 101.706(4)                                                    |
| Volume/Å <sup>3</sup>                       | 1916.60(11)                                                       | 2168.46(14)                                                       | 598.87(8)                                                     |
| Z                                           | 4                                                                 | 4                                                                 | 2                                                             |
| ρ <sub>calc</sub> /cm <sup>3</sup>          | 1.640                                                             | 1.548                                                             | 1.974                                                         |
| μ/mm <sup>-1</sup>                          | 8.282                                                             | 7.393                                                             | 13.023                                                        |
| F(000)                                      | 952.0                                                             | 1024.0                                                            | 348.0                                                         |
| Crystal size/mm <sup>3</sup>                | 0.195 × 0.146 × 0.096                                             | 0.33 × 0.216 × 0.132                                              | 0.139 × 0.114 × 0.058                                         |
| Radiation                                   | CuKα (λ = 1.54178)                                                | CuKα (λ = 1.54178)                                                | CuKα (λ = 1.54178)                                            |
| 2θ range for data collection/°              | 9.166 to 144.434                                                  | 7.03 to 146.382                                                   | 8.354 to 144.782                                              |
| Index ranges                                | -11 ≤ h ≤ 11, -20 ≤ k ≤ 20, -15 ≤ l ≤ 14                          | -16 ≤ h ≤ 17, -9 ≤ k ≤ 9, -24 ≤ l ≤ 24                            | -8 ≤ h ≤ 8, -9 ≤ k ≤ 9, -13 ≤ l ≤ 12                          |
| Reflections collected                       | 21948                                                             | 18251                                                             | 11495                                                         |
| Independent reflections                     | 3742 [R <sub>int</sub> = 0.0369, R <sub>sigma</sub> = 0.0262]     | 4236 [R <sub>int</sub> = 0.0474, R <sub>sigma</sub> = 0.0427]     | 2336 [R <sub>int</sub> = 0.0725, R <sub>sigma</sub> = 0.0481] |
| Data/restraints/parameters                  | 3742/0/248                                                        | 4236/0/279                                                        | 2336/0/164                                                    |
| Goodness-of-fit on F <sup>2</sup>           | 1.042                                                             | 1.023                                                             | 1.066                                                         |
| Final R indexes [I ≥ 2σ (I)]                | R <sub>1</sub> = 0.0223, wR <sub>2</sub> = 0.0596                 | R <sub>1</sub> = 0.0484, wR <sub>2</sub> = 0.1370                 | R <sub>1</sub> = 0.0454, wR <sub>2</sub> = 0.1062             |
| Final R indexes [all data]                  | R <sub>1</sub> = 0.0227, wR <sub>2</sub> = 0.0597                 | R <sub>1</sub> = 0.0510, wR <sub>2</sub> = 0.1409                 | R <sub>1</sub> = 0.0597, wR <sub>2</sub> = 0.1153             |
| Largest diff. peak/hole / e Å <sup>-3</sup> | 0.75/-0.80                                                        | 1.46/-1.00                                                        | 0.99/-0.95                                                    |

**Table S3** Crystal data and structure refinement for **Mn1b'** and **Mn1d'**.

|                        | <b>Mn1b'</b>                                                                                  | <b>Mn1d'</b>                                                                                   |
|------------------------|-----------------------------------------------------------------------------------------------|------------------------------------------------------------------------------------------------|
| CCDC deposition number | 2540712                                                                                       | 2540713                                                                                        |
| Identification code    | Q23108sp_0m                                                                                   | Q24037sp_0m                                                                                    |
| Empirical formula      | C <sub>45</sub> H <sub>45</sub> Br <sub>3</sub> Mn <sub>2</sub> N <sub>4</sub> O <sub>9</sub> | C <sub>50</sub> H <sub>62</sub> Br <sub>2</sub> Mn <sub>3</sub> N <sub>8</sub> O <sub>12</sub> |
| Formula weight         | 1135.46                                                                                       | 1291.71                                                                                        |
| Temperature/K          | 300.0                                                                                         | 150                                                                                            |
| Crystal system         | monoclinic                                                                                    | triclinic                                                                                      |

|                                             |                                                               |                                                               |
|---------------------------------------------|---------------------------------------------------------------|---------------------------------------------------------------|
| Space group                                 | P2 <sub>1</sub> /n                                            | P-1                                                           |
| a/Å                                         | 19.7281(5)                                                    | 9.8003(3)                                                     |
| b/Å                                         | 13.7214(4)                                                    | 11.9289(4)                                                    |
| c/Å                                         | 20.1806(5)                                                    | 13.5920(5)                                                    |
| $\alpha$ /°                                 | 90                                                            | 107.780(2)                                                    |
| $\beta$ /°                                  | 117.4880(10)                                                  | 105.386(2)                                                    |
| $\gamma$ /°                                 | 90                                                            | 96.000(2)                                                     |
| Volume/Å <sup>3</sup>                       | 4846.1(2)                                                     | 1428.77(9)                                                    |
| Z                                           | 4                                                             | 1                                                             |
| $\rho$ calc/cm <sup>3</sup>                 | 1.556                                                         | 1.501                                                         |
| $\mu$ /mm <sup>-1</sup>                     | 7.602                                                         | 7.487                                                         |
| F(000)                                      | 2280.0                                                        | 659.0                                                         |
| Crystal size/mm <sup>3</sup>                | 0.191 × 0.1 × 0.082                                           | 0.182 × 0.117 × 0.099                                         |
| Radiation                                   | CuK $\alpha$ ( $\lambda$ = 1.54178)                           | CuK $\alpha$ ( $\lambda$ = 1.54178)                           |
| 2 $\theta$ range for data collection/°      | 5.182 to 144.688                                              | 7.194 to 144.64                                               |
| Index ranges                                | -24 ≤ h ≤ 24, -16 ≤ k ≤ 16, -24 ≤ l ≤ 24                      | -12 ≤ h ≤ 12, -14 ≤ k ≤ 14, -16 ≤ l ≤ 16                      |
| Reflections collected                       | 60602                                                         | 35207                                                         |
| Independent reflections                     | 9528 [R <sub>int</sub> = 0.0991, R <sub>sigma</sub> = 0.0536] | 5587 [R <sub>int</sub> = 0.0427, R <sub>sigma</sub> = 0.0301] |
| Data/restraints/parameters                  | 9528/1/579                                                    | 5587/40/375                                                   |
| Goodness-of-fit on F <sup>2</sup>           | 1.027                                                         | 1.141                                                         |
| Final R indexes [I ≥ 2 $\sigma$ (I)]        | R <sub>1</sub> = 0.0600, wR <sub>2</sub> = 0.1501             | R <sub>1</sub> = 0.0284, wR <sub>2</sub> = 0.0700             |
| Final R indexes [all data]                  | R <sub>1</sub> = 0.0929, wR <sub>2</sub> = 0.1687             | R <sub>1</sub> = 0.0293, wR <sub>2</sub> = 0.0704             |
| Largest diff. peak/hole / e Å <sup>-3</sup> | 1.25/-1.02                                                    | 0.45/-0.39                                                    |

**Table S4** Crystal data and structure refinement for HL1a and HL1e

|                             | HL1e                                             | HL1a                                             |
|-----------------------------|--------------------------------------------------|--------------------------------------------------|
| CCDC deposition number      | 2540714                                          | 2540715                                          |
| Identification code         | Q25011sp_0ma                                     | 15126                                            |
| Empirical formula           | C <sub>16</sub> H <sub>18</sub> N <sub>2</sub> O | C <sub>19</sub> H <sub>24</sub> N <sub>2</sub> O |
| Formula weight              | 254.32                                           | 296.40                                           |
| Temperature/K               | 120.0                                            | 150(2)                                           |
| Crystal system              | monoclinic                                       | Triclinic                                        |
| Space group                 | P2 <sub>1</sub> /c                               | P-1                                              |
| a/Å                         | 14.5505(7)                                       | 8.866(2)                                         |
| b/Å                         | 8.3619(4)                                        | 12.571(3)                                        |
| c/Å                         | 12.1374(5)                                       | 15.275(3)                                        |
| $\alpha$ /°                 | 90                                               | 91.980(4)                                        |
| $\beta$ /°                  | 103.028(2)                                       | 100.619(4)                                       |
| $\gamma$ /°                 | 90                                               | 94.830(4)                                        |
| Volume/Å <sup>3</sup>       | 1438.74(11)                                      | 1665.2(6)                                        |
| Z                           | 4                                                | 4                                                |
| $\rho$ calc/cm <sup>3</sup> | 1.174                                            | 1.182                                            |
| $\mu$ /mm <sup>-1</sup>     | 0.584                                            | 0.073                                            |

|                                             |                                                               |                                          |
|---------------------------------------------|---------------------------------------------------------------|------------------------------------------|
| F(000)                                      | 544.0                                                         | 640                                      |
| Crystal size/mm <sup>3</sup>                | 0.348 × 0.268 × 0.134                                         | 0.36 x 0.15 x 0.10                       |
| Radiation                                   | CuKα (λ = 1.54178)                                            | Mo-Kα (λ = 0.71073)                      |
| 2θ range for data collection/°              | 6.234 to 145.002                                              | 1.36 to 26.00°                           |
| Index ranges                                | -17 ≤ h ≤ 17, -10 ≤ k ≤ 10, -14 ≤ l ≤ 14                      | -10 ≤ h ≤ 10, -15 ≤ k ≤ 15, -18 ≤ l ≤ 18 |
| Reflections collected                       | 16057                                                         | 13003                                    |
| Independent reflections                     | 2816 [R <sub>int</sub> = 0.0419, R <sub>sigma</sub> = 0.0342] | 6446 [R <sub>(int)</sub> = 0.0453]       |
| Data/restraints/parameters                  | 2816/0/176                                                    | 6446 / 0 / 427                           |
| Goodness-of-fit on F <sup>2</sup>           | 1.052                                                         | 0.932                                    |
| Final R indexes [I ≥ 2σ (I)]                | R1 = 0.0417, wR2 = 0.1097                                     | R1 = 0.0536, wR2 = 0.1234                |
| Final R indexes [all data]                  | R1 = 0.0434, wR2 = 0.1105                                     | R1 = 0.0801, wR2 = 0.1341                |
| Largest diff. peak/hole / e Å <sup>-3</sup> | 0.25/-0.24                                                    | 0.339/-0.306                             |

## 8. Computational methods

### 8.1. Details of calculations

All the calculations were performed at B3LYP-D3(BJ)<sup>10,11</sup> method using ORCA 6.0.1 software package.<sup>12,13</sup> For Mn, the def2-TZVP with the auxiliary def2/J basis sets were used.<sup>14,15</sup> The Br atom was treated with the 6-311+g(d,p) basis set,<sup>16–18</sup> while the remaining atoms (C, H, N, and O) were described using the 6-31+G(d,p) basis set.<sup>17–19</sup> Structures were optimized using the SMD implicit solvation model,<sup>20</sup> with isopropanol as the solvent. Harmonic vibration frequency calculations were used to confirm the stationary points and to obtain thermodynamic data. The 3D representations of the optimized structures were generated by CYLview20.<sup>21</sup>

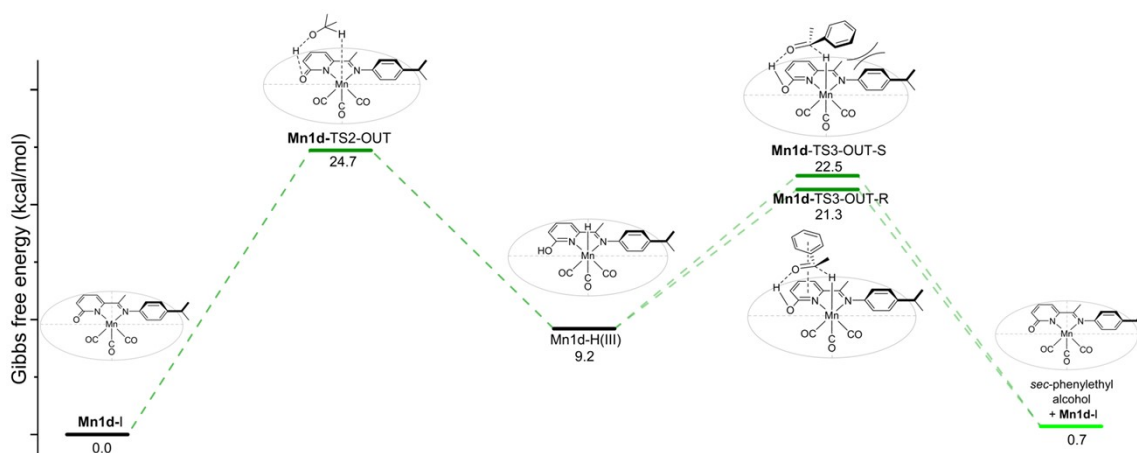

**Figure S66** Outer sphere reaction pathway for the TH of **1a** using **Mn1d** and  $K^tBuO$  in  $iPrOH$

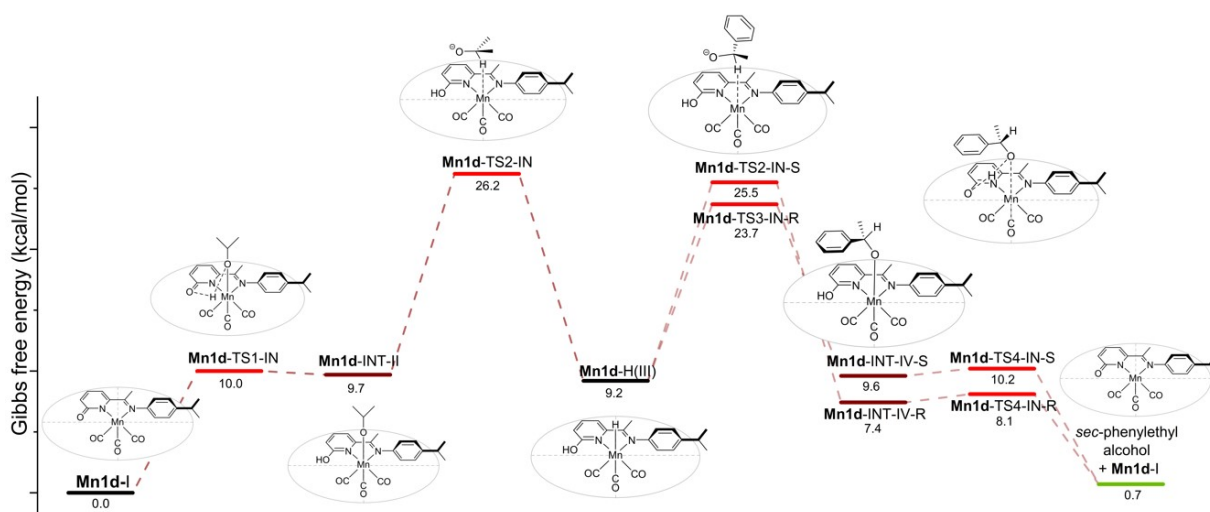

**Figure S67** Inner sphere reaction pathway for the TH of **1a** using **Mn1d** and  $K^tBuO$  in  $iPrOH$  (where multiple transition states and intermediates have been calculated the lowest energy structure has been shown)

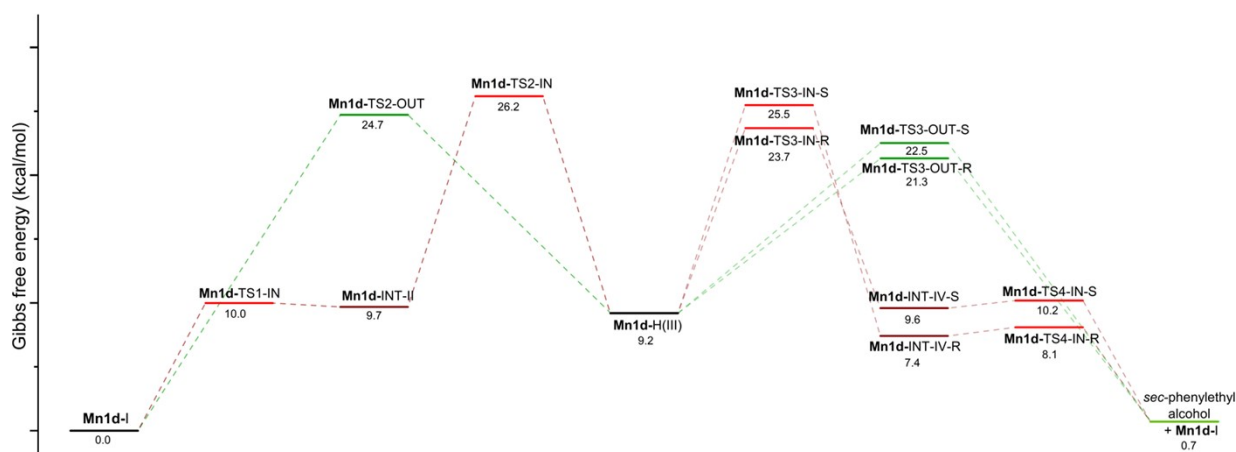

**Figure S68** Inner sphere and outer sphere reaction pathways for the TH of **1a** using **Mn1d** and  $K^tBuO$  in  $iPrOH$

An alternative inner sphere pathway suggested in the literature follows a more complex stepwise pathway with the initial transfer of the O-H proton of the hydrogen source ( $iPrOH$ ) to protonate the pyridonate scaffold and subsequently rearomatize it to neutral pyridone form with the newly formed alkoxide now coordinated maintaining the +1 oxidation state of the Mn centre (**Mn1d-III**).  $\beta$ -H elimination then follows (**Mn1d-TS2-IN**) forming the common intermediate (**Mn1d-III**) also found in the inner sphere pathway. Of note in the first half of the reaction pathway, is the difference in energy barrier in the proposed outer sphere pathway (from **Mn1d-I** to **Mn1d-TS2-IN** ( $\Delta G = 24.7$  kcal/mol)) compared with the inner sphere pathway (**Mn1d-I** to **Mn1d-TS2-OUT** ( $\Delta G = 26.2$  kcal/mol)). Upon approach from an acetophenone molecule to **III**, a 1,2 insertion of the substrate across the Mn-H bond calculations revealed two possible alkoxide coordinated complexes depending on the plane the insertion occurs from with a similar trend to that of outer sphere **Mn1d-TS3-OUT** energy levels the S form of this transition state (**Mn1d-TS3-IN-S**, 25.5 kcal/mol) was calculated to be higher than the corresponding R form (**Mn1d-TS3-IN-R**, 23.7 kcal/mol), these transition states ultimately then form corresponding Intermediates (**INT-IV-R**, 9.6 kcal/mol and **INT-IV-S**, 7.4 kcal/mol) with the between R and S enantiomers reaching greatest difference ( $\Delta G_{INT-IV-R \text{ to } INT-IV-S} = 2.2$  kcal/mol). Finally, in similar fashion to **Mn1d-TS1-IN**, transition states **Mn1d-TS4-IN-S** and **Mn1d-TS4-IN-R** show a proton being held between the  $O^-$  of the alkoxide and the ligand scaffold subsequently leading the deprotonation and dearomatisation of the ligand scaffold along with the dissociation of sec-phenylethyl alcohol and the reformation of **Mn1d-I**. Whilst not conclusive the difference in highest energy transition states (**Mn1d-TS2-IN** and **Mn1d-TS2-OUT**) of 1.5 kcal/mol suggests a preference for an outer sphere pathway to preferable however magnitude of this difference it is plausible that both pathways are possible.

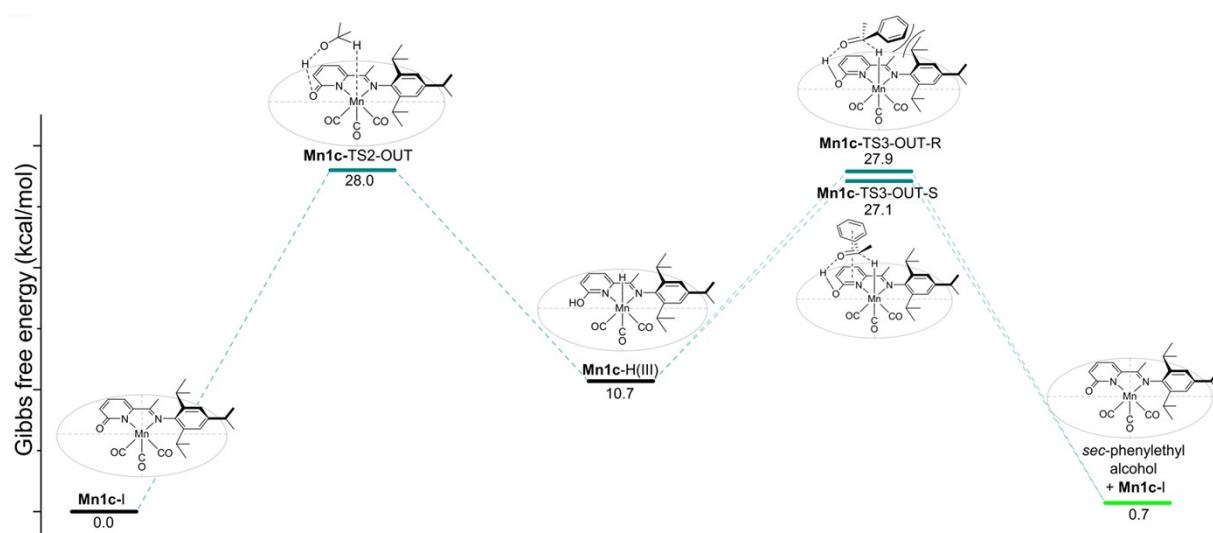

**Figure S69** Outer sphere reaction pathway for the TH of **1a** using **Mn1c** and K<sup>t</sup>BuO in <sup>i</sup>PrOH

## 8.2. Optimised Geometries for common intermediates and substrates

### 1-Phenylethanol

Gibbs free energy: -385.79604933 Eh

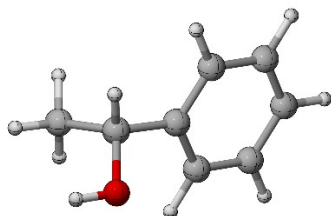

|   |          |          |          |
|---|----------|----------|----------|
| C | 0.70212  | -1.13147 | -0.13717 |
| C | 0.07472  | -2.21844 | -0.76495 |
| C | 1.95775  | -1.32246 | 0.45374  |
| C | 0.69215  | -3.47171 | -0.79732 |
| H | -0.89970 | -2.08466 | -1.22588 |
| C | 2.58208  | -2.57422 | 0.41564  |
| H | 2.44983  | -0.48726 | 0.94677  |
| C | 1.94964  | -3.65325 | -0.20909 |
| H | 0.19325  | -4.30624 | -1.28325 |
| H | 3.55648  | -2.70583 | 0.87884  |
| H | 2.43003  | -4.62769 | -0.23613 |
| C | 0.06432  | 0.24187  | -0.13950 |
| H | 0.58085  | 0.86560  | 0.60226  |
| O | -1.31587 | 0.09259  | 0.25867  |
| H | -1.73897 | 0.96254  | 0.19840  |
| C | 0.16070  | 0.91703  | -1.50875 |
| H | 1.20971  | 1.04064  | -1.79992 |
| H | -0.34393 | 0.31444  | -2.27227 |
| H | -0.30366 | 1.91032  | -1.47900 |

### Acetone

Gibbs free energy: -193.01955669 Eh

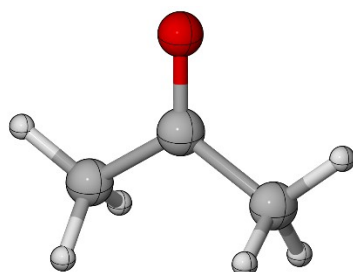

|   |          |          |          |
|---|----------|----------|----------|
| C | -0.20092 | 0.13892  | -0.22842 |
| C | 0.50937  | -1.17989 | -0.39094 |
| H | 0.46288  | -1.72664 | 0.56012  |
| H | 0.00258  | -1.80064 | -1.13856 |

|   |          |          |          |
|---|----------|----------|----------|
| H | 1.55466  | -1.02885 | -0.67013 |
| C | -1.69868 | 0.09493  | -0.07019 |
| H | -2.14717 | -0.21932 | -1.02181 |
| H | -1.98346 | -0.65430 | 0.67735  |
| H | -2.09115 | 1.07559  | 0.20844  |
| O | 0.41531  | 1.20480  | -0.22396 |

### Isopropanol

Gibbs free energy: -194.19677155 Eh

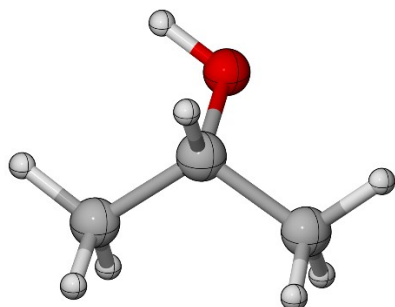

|   |          |          |          |
|---|----------|----------|----------|
| C | -0.35059 | -0.01546 | -0.03135 |
| H | -1.45061 | -0.01985 | -0.03079 |
| O | 0.10236  | 0.63428  | 1.18000  |
| H | -0.21612 | 1.54923  | 1.16968  |
| C | 0.15355  | -1.44947 | 0.02611  |
| H | -0.21365 | -1.95688 | 0.92513  |
| H | -0.19440 | -2.00954 | -0.84854 |
| H | 1.25013  | -1.47377 | 0.03628  |
| C | 0.14482  | 0.73584  | -1.26307 |
| H | -0.22310 | 0.25771  | -2.17854 |
| H | -0.21273 | 1.77273  | -1.25875 |
| H | 1.24112  | 0.74698  | -1.29466 |

### Acetophenone

Gibbs free energy: -384.62000779 Eh

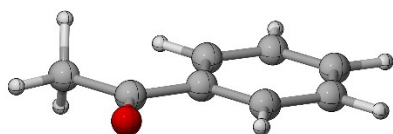

|   |          |          |          |
|---|----------|----------|----------|
| C | -0.20202 | 0.09390  | -0.28227 |
| C | -1.70950 | 0.10197  | -0.24224 |
| H | -2.06897 | 1.13218  | -0.27637 |
| H | -2.12017 | -0.45594 | -1.09176 |
| H | -2.07426 | -0.38209 | 0.67106  |
| O | 0.42614  | 1.15528  | -0.34666 |
| C | 0.52029  | -1.21234 | -0.24252 |
| C | -0.16903 | -2.43571 | -0.17115 |
| C | 1.92673  | -1.21866 | -0.27555 |

|   |          |          |          |
|---|----------|----------|----------|
| C | 0.53593  | -3.64047 | -0.13274 |
| H | -1.25307 | -2.45566 | -0.14489 |
| C | 2.62873  | -2.42167 | -0.23713 |
| H | 2.45860  | -0.27440 | -0.33064 |
| C | 1.93398  | -3.63587 | -0.16530 |
| H | -0.00541 | -4.58061 | -0.07740 |
| H | 3.71479  | -2.41643 | -0.26253 |
| H | 2.48147  | -4.57400 | -0.13516 |

### **K<sup>+</sup> ion**

Gibbs free energy: -599.75799228 Eh

|   |         |         |         |
|---|---------|---------|---------|
| K | 0.00000 | 0.00000 | 0.00000 |
|---|---------|---------|---------|

### **<sup>t</sup>BuO-**

Gibbs free energy: -232.96809698 Eh

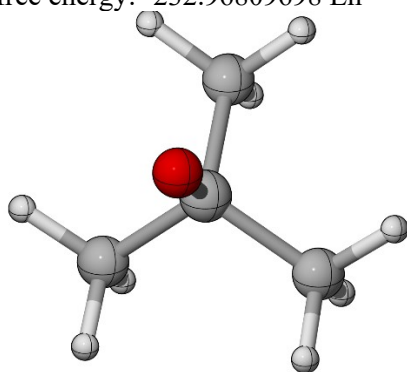

|   |          |          |          |
|---|----------|----------|----------|
| C | -3.14634 | 1.72980  | 0.00073  |
| C | -1.59744 | 1.76464  | -0.05770 |
| H | -3.54627 | 2.75258  | 0.00530  |
| H | -3.54499 | 1.21808  | -0.88533 |
| H | -3.52937 | 1.21267  | 0.89221  |
| C | -1.08229 | 0.30182  | -0.03333 |
| C | -1.08229 | 2.47727  | 1.21882  |
| H | 0.01553  | 0.28919  | -0.05750 |
| H | -1.40839 | -0.25181 | 0.85883  |
| H | -1.44346 | -0.23907 | -0.91820 |
| H | -1.40920 | 1.98477  | 2.14594  |
| H | 0.01561  | 2.50269  | 1.21823  |
| H | -1.44164 | 3.51469  | 1.24192  |
| O | -1.15876 | 2.42727  | -1.20453 |

### **<sup>t</sup>BuOH**

Gibbs free energy: -233.46852378 Eh

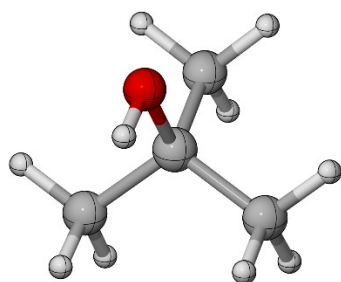

|   |          |          |          |
|---|----------|----------|----------|
| C | -3.15613 | 1.72822  | -0.00449 |
| C | -1.62405 | 1.72421  | -0.00096 |
| H | -3.53881 | 2.75493  | 0.00199  |
| H | -3.54210 | 1.22025  | -0.89688 |
| H | -3.54895 | 1.20824  | 0.87654  |
| C | -1.08070 | 0.29206  | -0.03912 |
| C | -1.07494 | 2.48825  | 1.20223  |
| H | 0.01484  | 0.29584  | -0.05891 |
| H | -1.40790 | -0.27214 | 0.84148  |
| H | -1.44133 | -0.23472 | -0.93123 |
| H | -1.39100 | 2.00961  | 2.13491  |
| H | 0.02051  | 2.50823  | 1.18060  |
| H | -1.44115 | 3.52105  | 1.20472  |
| O | -1.14262 | 2.44889  | -1.16670 |
| H | -1.46809 | 1.99507  | -1.95927 |

### Mn1d

Gibbs free energy: -4869.60588178 Eh

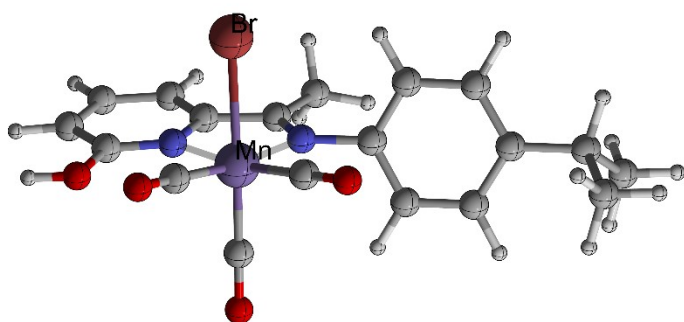

|    |         |          |         |
|----|---------|----------|---------|
| Mn | 5.79402 | 5.17871  | 6.33172 |
| O  | 6.02492 | 3.93273  | 8.99899 |
| O  | 5.52553 | 2.56435  | 4.95422 |
| N  | 5.68170 | 7.10058  | 7.15371 |
| N  | 3.77652 | 5.47888  | 6.49119 |
| C  | 5.21824 | 9.71905  | 8.00998 |
| H  | 5.04310 | 10.73988 | 8.33438 |
| C  | 4.14477 | 8.89442  | 7.65099 |
| H  | 3.12729 | 9.26069  | 7.69658 |
| C  | 4.41216 | 7.59610  | 7.23649 |
| C  | 3.35238 | 6.64082  | 6.86679 |
| C  | 1.91303 | 7.04252  | 6.95652 |

|    |          |          |         |
|----|----------|----------|---------|
| H  | 1.25278  | 6.19019  | 6.79938 |
| H  | 1.70077  | 7.47872  | 7.93764 |
| H  | 1.68728  | 7.80309  | 6.19977 |
| C  | 2.87294  | 4.44859  | 6.08651 |
| C  | 2.28863  | 4.48259  | 4.81881 |
| H  | 2.48991  | 5.32027  | 4.15926 |
| C  | 1.47099  | 3.42515  | 4.40984 |
| H  | 1.02201  | 3.45568  | 3.41990 |
| C  | 1.22141  | 2.32773  | 5.24536 |
| C  | 1.82158  | 2.31664  | 6.51607 |
| H  | 1.64917  | 1.48120  | 7.18897 |
| C  | 2.64778  | 3.35913  | 6.93489 |
| H  | 3.11983  | 3.33350  | 7.91252 |
| C  | 5.92377  | 4.42268  | 7.94965 |
| C  | 5.61719  | 3.58363  | 5.49854 |
| C  | 6.69350  | 7.88869  | 7.52688 |
| O  | 7.91651  | 7.32934  | 7.46871 |
| H  | 8.59644  | 7.96329  | 7.75040 |
| C  | 0.33216  | 1.18437  | 4.78552 |
| C  | -0.91756 | 1.04882  | 5.67295 |
| C  | 1.10640  | -0.14393 | 4.72406 |
| H  | -0.00284 | 1.42482  | 3.76855 |
| H  | -1.48857 | 1.98405  | 5.70126 |
| H  | -1.57616 | 0.25980  | 5.29073 |
| H  | -0.64445 | 0.78803  | 6.70247 |
| H  | 1.98490  | -0.06209 | 4.07377 |
| H  | 1.45032  | -0.44724 | 5.72014 |
| H  | 0.46645  | -0.94362 | 4.33251 |
| C  | 7.58730  | 5.07379  | 6.04567 |
| O  | 8.71209  | 4.92649  | 5.81054 |
| C  | 6.50564  | 9.21520  | 7.95718 |
| H  | 7.36720  | 9.81217  | 8.23843 |
| Br | 5.65408  | 6.31725  | 4.01489 |

### Mn1d-III

Gibbs free energy: -2296.10143046 Eh

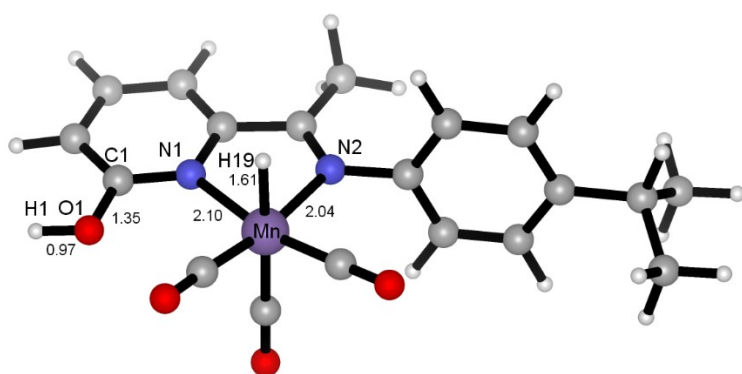

|    |         |          |         |
|----|---------|----------|---------|
| Mn | 5.79138 | 5.18012  | 6.27982 |
| O  | 6.12522 | 3.86113  | 8.93587 |
| O  | 5.50284 | 2.63245  | 4.81094 |
| N  | 5.67214 | 7.11816  | 7.08367 |
| N  | 3.78075 | 5.49493  | 6.43202 |
| C  | 5.19114 | 9.69216  | 8.07722 |
| H  | 5.01110 | 10.69324 | 8.45608 |
| C  | 4.12263 | 8.86470  | 7.71901 |

|   |          |          |         |
|---|----------|----------|---------|
| H | 3.10026  | 9.20627  | 7.81799 |
| C | 4.39765  | 7.58878  | 7.23699 |
| C | 3.34430  | 6.63467  | 6.86467 |
| C | 1.90043  | 7.00646  | 7.01084 |
| H | 1.24796  | 6.16063  | 6.79667 |
| H | 1.70080  | 7.35613  | 8.02913 |
| H | 1.64835  | 7.82435  | 6.32580 |
| C | 2.87295  | 4.46426  | 6.03296 |
| C | 2.30662  | 4.47840  | 4.75732 |
| H | 2.52126  | 5.30167  | 4.08239 |
| C | 1.47757  | 3.42535  | 4.35947 |
| H | 1.04128  | 3.44222  | 3.36357 |
| C | 1.20036  | 2.35005  | 5.21479 |
| C | 1.78361  | 2.35786  | 6.49328 |
| H | 1.58994  | 1.53981  | 7.18164 |
| C | 2.61884  | 3.39768  | 6.90146 |
| H | 3.07717  | 3.38753  | 7.88597 |
| C | 5.96545  | 4.39967  | 7.91533 |
| C | 5.60393  | 3.62800  | 5.40875 |
| C | 6.68150  | 7.91611  | 7.45208 |
| O | 7.91512  | 7.39093  | 7.31481 |
| H | 8.59016  | 8.02820  | 7.60059 |
| C | 0.29806  | 1.21145  | 4.76828 |
| C | -0.96899 | 1.12206  | 5.63688 |
| C | 1.04740  | -0.13237 | 4.75353 |
| H | -0.01498 | 1.43203  | 3.73984 |
| H | -1.52216 | 2.06839  | 5.63127 |
| H | -1.63607 | 0.33583  | 5.26373 |
| H | -0.71803 | 0.88341  | 6.67739 |
| H | 1.93836  | -0.08366 | 4.11699 |
| H | 1.36830  | -0.41713 | 5.76269 |
| H | 0.39894  | -0.92940 | 4.37060 |
| H | 5.68256  | 5.87994  | 4.83362 |
| C | 7.54911  | 5.11790  | 5.90509 |
| O | 8.66367  | 5.01026  | 5.58369 |
| C | 6.48546  | 9.21538  | 7.95094 |
| H | 7.34618  | 9.81638  | 8.22610 |

# Geometries for transition states of the outer sphere reaction pathway using Mn1d

## Mn1d-TS2-OUT

Gibbs free energy: -2489.09631521 Eh

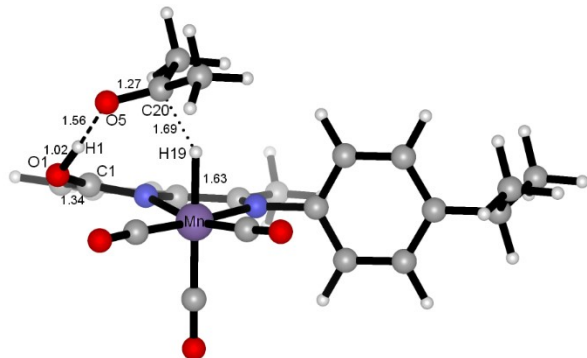

|    |         |          |          |
|----|---------|----------|----------|
| Mn | 4.71677 | 2.88577  | 2.80274  |
| O  | 1.87777 | 2.68882  | 0.98405  |
| C  | 4.96113 | 2.76773  | -0.39472 |
| H  | 5.22883 | 2.68928  | 1.27133  |
| O  | 3.83993 | 3.33716  | -0.55479 |
| H  | 2.67632 | 2.92147  | 0.39535  |
| O  | 3.82042 | 3.30216  | 5.61581  |
| O  | 7.14709 | 4.55044  | 3.01763  |
| N  | 3.27916 | 1.42840  | 2.33911  |
| N  | 5.65000 | 1.14161  | 3.31090  |
| C  | 1.34282 | -0.58488 | 2.42424  |
| H  | 0.57930 | -1.35472 | 2.47782  |
| C  | 2.61718 | -0.81159 | 2.96084  |
| H  | 2.86655 | -1.76068 | 3.41856  |
| C  | 3.55583 | 0.20987  | 2.89583  |
| C  | 4.94099 | 0.06077  | 3.37317  |
| C  | 4.15583 | 3.11436  | 4.51878  |
| C  | 6.19026 | 3.88965  | 2.97331  |
| C  | 3.82851 | 4.36073  | 2.26546  |
| O  | 3.31975 | 5.35913  | 1.95540  |
| C  | 2.10400 | 1.58417  | 1.70740  |
| C  | 1.08747 | 0.61226  | 1.77801  |
| H  | 0.14143 | 0.81336  | 1.28780  |
| C  | 6.21632 | 3.57462  | -0.65305 |
| H  | 6.10123 | 4.59199  | -0.27106 |
| H  | 7.10248 | 3.11029  | -0.21415 |
| H  | 6.35684 | 3.62648  | -1.74243 |
| C  | 5.06358 | 1.26552  | -0.56244 |
| H  | 4.17730 | 0.76364  | -0.16911 |
| H  | 5.11799 | 1.06794  | -1.64321 |
| H  | 5.96217 | 0.85772  | -0.09400 |
| C  | 5.43867 | -1.26913 | 3.84562  |
| H  | 4.82361 | -1.62588 | 4.67906  |
| H  | 5.36236 | -2.00892 | 3.04090  |
| H  | 6.47574 | -1.21182 | 4.17489  |
| C  | 7.02895 | 1.15032  | 3.68893  |
| C  | 8.01066 | 0.90513  | 2.72429  |
| C  | 7.39484 | 1.48699  | 4.99326  |

|   |          |          |         |
|---|----------|----------|---------|
| C | 9.35881  | 0.98754  | 3.07501 |
| H | 7.71462  | 0.65557  | 1.70975 |
| C | 8.74910  | 1.56485  | 5.32941 |
| H | 6.62566  | 1.69114  | 5.73223 |
| C | 9.75307  | 1.32039  | 4.38161 |
| H | 10.11100 | 0.79274  | 2.31550 |
| H | 9.02812  | 1.82492  | 6.34770 |
| C | 11.22182 | 1.41734  | 4.76058 |
| C | 11.94306 | 2.51254  | 3.95570 |
| C | 11.93570 | 0.06323  | 4.60390 |
| H | 11.26340 | 1.69784  | 5.82070 |
| H | 11.45251 | 3.48487  | 4.07943 |
| H | 12.98317 | 2.61153  | 4.28839 |
| H | 11.95482 | 2.27378  | 2.88552 |
| H | 11.44427 | -0.71633 | 5.19739 |
| H | 11.94020 | -0.26147 | 3.55648 |
| H | 12.97798 | 0.13758  | 4.93636 |

### Mn1d-TS3-OUT-R

Gibbs free energy: -2680.70212919 Eh

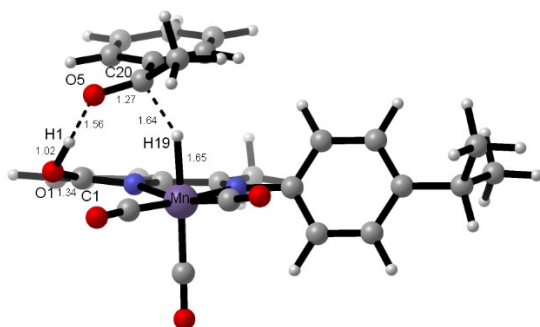

|    |         |          |          |
|----|---------|----------|----------|
| Mn | 4.67757 | 2.86267  | 2.80748  |
| O  | 1.79957 | 2.71551  | 1.10834  |
| C  | 4.80705 | 2.91694  | -0.37036 |
| H  | 5.15107 | 2.83067  | 1.23208  |
| O  | 3.67756 | 3.49590  | -0.47338 |
| H  | 2.54716 | 3.04217  | 0.49512  |
| O  | 3.76464 | 3.05383  | 5.63439  |
| O  | 7.00896 | 4.66308  | 3.03995  |
| N  | 3.32897 | 1.37881  | 2.23132  |
| N  | 5.73500 | 1.14018  | 3.17400  |
| C  | 1.58121 | -0.78845 | 1.97159  |
| H  | 0.89511 | -1.62524 | 1.88590  |
| C  | 2.88013 | -0.98414 | 2.45517  |
| H  | 3.22168 | -1.97292 | 2.73215  |
| C  | 3.72159 | 0.11559  | 2.57663  |
| C  | 5.10696 | 0.01054  | 3.06134  |
| C  | 4.12186 | 2.94830  | 4.53314  |
| C  | 6.09668 | 3.94246  | 3.00013  |
| C  | 3.70492 | 4.32775  | 2.40263  |
| O  | 3.15118 | 5.32798  | 2.19324  |
| C  | 2.12979 | 1.53019  | 1.64309  |
| C  | 1.20336 | 0.47557  | 1.55469  |
| H  | 0.23392 | 0.67272  | 1.11097  |
| C  | 6.03962 | 3.74464  | -0.68349 |

|   |          |          |          |
|---|----------|----------|----------|
| H | 5.91535  | 4.74885  | -0.27150 |
| H | 6.96381  | 3.30864  | -0.30148 |
| H | 6.11921  | 3.81982  | -1.77689 |
| C | 5.67990  | -1.33436 | 3.38667  |
| H | 6.64943  | -1.25064 | 3.87552  |
| H | 5.00040  | -1.88226 | 4.04673  |
| H | 5.79962  | -1.92406 | 2.47039  |
| C | 7.10170  | 1.17942  | 3.59674  |
| C | 8.11801  | 0.67905  | 2.77449  |
| C | 7.43083  | 1.76826  | 4.82097  |
| C | 9.45053  | 0.77500  | 3.17632  |
| H | 7.86326  | 0.21465  | 1.82890  |
| C | 8.76787  | 1.84587  | 5.21666  |
| H | 6.64746  | 2.15974  | 5.46135  |
| C | 9.80167  | 1.35961  | 4.40372  |
| H | 10.22380 | 0.38390  | 2.52081  |
| H | 9.00984  | 2.29892  | 6.17508  |
| C | 11.25250 | 1.46245  | 4.84329  |
| C | 12.07728 | 2.32796  | 3.87474  |
| C | 11.89010 | 0.07226  | 5.01395  |
| H | 11.25825 | 1.95666  | 5.82302  |
| H | 11.64147 | 3.32769  | 3.76548  |
| H | 13.10401 | 2.44258  | 4.24212  |
| H | 12.12648 | 1.86992  | 2.87966  |
| H | 11.32194 | -0.54131 | 5.72261  |
| H | 11.93021 | -0.46404 | 4.05830  |
| H | 12.91591 | 0.16430  | 5.39020  |
| C | 4.88059  | 1.42366  | -0.55781 |
| C | 6.05735  | 0.70317  | -0.30049 |
| C | 3.74134  | 0.72953  | -0.99187 |
| C | 6.08911  | -0.68230 | -0.45336 |
| H | 6.94194  | 1.22164  | 0.05078  |
| C | 3.77080  | -0.65852 | -1.14311 |
| H | 2.83327  | 1.28141  | -1.20907 |
| C | 4.94296  | -1.36982 | -0.87057 |
| H | 7.00366  | -1.22737 | -0.23693 |
| H | 2.87707  | -1.18321 | -1.46934 |
| H | 4.96452  | -2.45062 | -0.98042 |

### Mn1d-TS3-OUT-S

Gibbs free energy: -2680.70017842 Eh

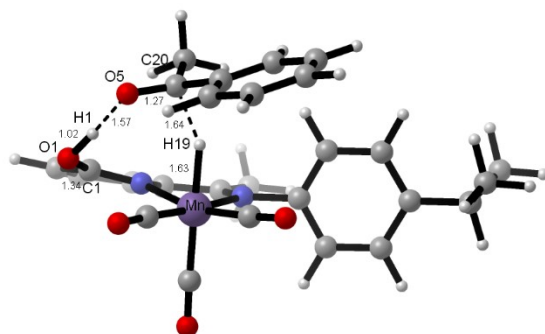

|    |         |         |          |
|----|---------|---------|----------|
| Mn | 4.69018 | 2.91247 | 2.73097  |
| O  | 1.92034 | 2.67324 | 0.82552  |
| C  | 5.05368 | 2.65751 | -0.41830 |

|   |          |          |          |
|---|----------|----------|----------|
| H | 5.21164  | 2.65379  | 1.21142  |
| O | 3.94973  | 3.23445  | -0.67589 |
| H | 2.74586  | 2.87195  | 0.26202  |
| O | 3.80844  | 3.46276  | 5.52394  |
| O | 7.15618  | 4.53631  | 2.85237  |
| N | 3.24822  | 1.46223  | 2.29480  |
| N | 5.59510  | 1.17896  | 3.30730  |
| C | 1.27714  | -0.51056 | 2.41671  |
| H | 0.49784  | -1.26320 | 2.48551  |
| C | 2.53165  | -0.73418 | 3.00058  |
| H | 2.75131  | -1.66546 | 3.50770  |
| C | 3.49040  | 0.26612  | 2.91308  |
| C | 4.86771  | 0.11396  | 3.41350  |
| C | 4.13562  | 3.22261  | 4.43447  |
| C | 6.18435  | 3.89795  | 2.85236  |
| C | 3.82135  | 4.37711  | 2.13315  |
| O | 3.32078  | 5.36794  | 1.78792  |
| C | 2.09918  | 1.60571  | 1.61476  |
| C | 1.06303  | 0.65601  | 1.70266  |
| H | 0.13636  | 0.84634  | 1.17274  |
| C | 5.34126  | -1.20279 | 3.94250  |
| H | 4.71593  | -1.51432 | 4.78646  |
| H | 5.25683  | -1.97441 | 3.16910  |
| H | 6.37759  | -1.14739 | 4.27513  |
| C | 6.98080  | 1.18584  | 3.65855  |
| C | 7.93431  | 0.89760  | 2.67742  |
| C | 7.38407  | 1.58173  | 4.93470  |
| C | 9.29157  | 1.00455  | 2.98034  |
| H | 7.60890  | 0.60506  | 1.68445  |
| C | 8.74796  | 1.68009  | 5.22452  |
| H | 6.63686  | 1.81996  | 5.68595  |
| C | 9.72365  | 1.40068  | 4.25686  |
| H | 10.02032 | 0.78378  | 2.20525  |
| H | 9.05686  | 1.98849  | 6.22046  |
| C | 11.20268 | 1.53885  | 4.57804  |
| C | 11.85762 | 2.64498  | 3.73163  |
| C | 11.94972 | 0.20486  | 4.40729  |
| H | 11.27841 | 1.83388  | 5.63230  |
| H | 11.34788 | 3.60538  | 3.86979  |
| H | 12.90927 | 2.77391  | 4.01417  |
| H | 11.82469 | 2.39578  | 2.66420  |
| H | 11.50193 | -0.58359 | 5.02318  |
| H | 11.92927 | -0.12906 | 3.36303  |
| H | 12.99993 | 0.31262  | 4.70348  |
| C | 6.32368  | 3.45275  | -0.56946 |
| C | 7.58913  | 2.84606  | -0.53381 |
| C | 6.23892  | 4.84743  | -0.70151 |
| C | 8.74707  | 3.62171  | -0.62311 |
| H | 7.68087  | 1.77173  | -0.42347 |
| C | 7.39588  | 5.62183  | -0.79191 |
| H | 5.26131  | 5.31719  | -0.71968 |
| C | 8.65509  | 5.01158  | -0.74950 |
| H | 9.72028  | 3.13969  | -0.58834 |
| H | 7.31677  | 6.70129  | -0.88903 |
| H | 9.55678  | 5.61469  | -0.81233 |
| C | 5.11723  | 1.14622  | -0.53549 |
| H | 5.29424  | 0.90221  | -1.59223 |

|   |         |         |          |
|---|---------|---------|----------|
| H | 5.91127 | 0.69566 | 0.06085  |
| H | 4.15788 | 0.71724 | -0.24105 |

### 9.3. Geometries for transition states and intermediates of the inner sphere reaction pathway using Mn1d

#### Mn1d-TS1-IN

Gibbs free energy: -2489.11962986 Eh

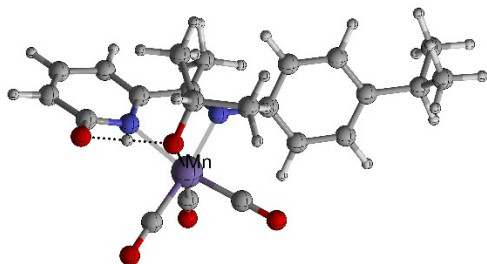

|    |          |          |         |
|----|----------|----------|---------|
| Mn | 4.48689  | 3.42256  | 3.03285 |
| O  | 1.64802  | 3.22519  | 1.21472 |
| O  | 4.36541  | 3.09758  | 5.97918 |
| O  | 6.90088  | 5.14647  | 3.13462 |
| N  | 2.92970  | 1.95238  | 2.63337 |
| N  | 5.45729  | 1.48500  | 3.10364 |
| C  | 0.98503  | -0.02010 | 2.67855 |
| H  | 0.21079  | -0.77972 | 2.73592 |
| C  | 2.27894  | -0.29988 | 3.16094 |
| H  | 2.52607  | -1.28321 | 3.54024 |
| C  | 3.23025  | 0.70796  | 3.09919 |
| C  | 4.67212  | 0.47965  | 3.35095 |
| C  | 4.42939  | 3.21601  | 4.82714 |
| C  | 5.97003  | 4.45746  | 3.10730 |
| C  | 3.43366  | 4.89149  | 3.22812 |
| O  | 2.77422  | 5.82498  | 3.41193 |
| C  | 1.76074  | 2.15844  | 1.97618 |
| C  | 0.72419  | 1.18996  | 2.06639 |
| H  | -0.23332 | 1.40567  | 1.60386 |
| C  | 5.13757  | -0.87390 | 3.79506 |
| H  | 5.05670  | -1.59842 | 2.97664 |
| H  | 6.17415  | -0.84588 | 4.13089 |
| H  | 4.50847  | -1.23141 | 4.61580 |
| C  | 6.87617  | 1.33060  | 3.14298 |
| C  | 7.52144  | 0.59857  | 2.13751 |
| C  | 7.63542  | 1.95441  | 4.13682 |
| C  | 8.91211  | 0.49553  | 2.13202 |
| H  | 6.93184  | 0.12417  | 1.35949 |
| C  | 9.02729  | 1.83443  | 4.12442 |
| H  | 7.14584  | 2.52112  | 4.92174 |
| C  | 9.69218  | 1.11109  | 3.12444 |
| H  | 9.39189  | -0.07241 | 1.33964 |
| H  | 9.60567  | 2.31737  | 4.90841 |
| C  | 11.20772 | 1.00125  | 3.11774 |
| C  | 11.81402 | 1.63180  | 1.85191 |
| C  | 11.66898 | -0.45814 | 3.27714 |

|   |          |          |          |
|---|----------|----------|----------|
| H | 11.57610 | 1.56614  | 3.98344  |
| H | 11.50922 | 2.67918  | 1.74454  |
| H | 12.90927 | 1.59945  | 1.89384  |
| H | 11.49659 | 1.09302  | 0.95121  |
| H | 11.26102 | -0.90651 | 4.19035  |
| H | 11.34532 | -1.06951 | 2.42626  |
| H | 12.76285 | -0.51142 | 3.33122  |
| C | 6.32172  | 3.47286  | -0.08245 |
| C | 4.82443  | 3.18315  | -0.12450 |
| H | 6.50553  | 4.55010  | -0.00450 |
| H | 6.79164  | 2.97599  | 0.77282  |
| H | 6.80849  | 3.10840  | -0.99475 |
| C | 4.52984  | 1.68771  | -0.24308 |
| H | 4.40019  | 3.68501  | -1.00862 |
| H | 3.45230  | 1.49937  | -0.29110 |
| H | 4.98109  | 1.29125  | -1.16079 |
| H | 4.94160  | 1.13761  | 0.60578  |
| O | 4.19813  | 3.79222  | 1.01426  |
| H | 2.92207  | 3.50874  | 1.11453  |

### Mn1d-INT-II

Gibbs free energy: -2489.12017048 Eh

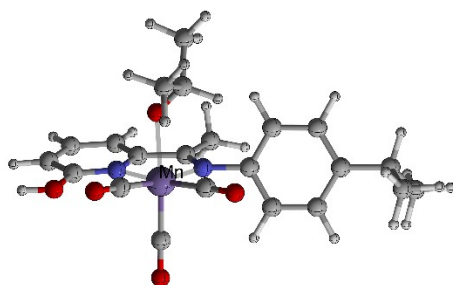

|    |         |          |         |
|----|---------|----------|---------|
| Mn | 5.88530 | 5.37690  | 6.33340 |
| O  | 6.25550 | 3.94100  | 8.90410 |
| O  | 5.62930 | 2.81520  | 4.87230 |
| N  | 5.70450 | 7.28420  | 7.41800 |
| N  | 3.79420 | 5.63040  | 6.66330 |
| C  | 5.16940 | 9.77890  | 8.53150 |
| H  | 4.96240 | 10.75490 | 8.95920 |
| C  | 4.11670 | 8.94910  | 8.12280 |
| H  | 3.08990 | 9.27240  | 8.23300 |
| C  | 4.41980 | 7.70760  | 7.57530 |
| C  | 3.37210 | 6.75220  | 7.14490 |
| C  | 1.92890 | 7.12130  | 7.31430 |
| H  | 1.27730 | 6.26820  | 7.12800 |
| H  | 1.74790 | 7.48880  | 8.32880 |

|   |          |          |         |
|---|----------|----------|---------|
| H | 1.65900  | 7.92340  | 6.61740 |
| C | 2.89920  | 4.63760  | 6.16940 |
| C | 2.18300  | 4.85050  | 4.98830 |
| H | 2.26480  | 5.80310  | 4.47440 |
| C | 1.37990  | 3.82920  | 4.47350 |
| H | 0.83050  | 4.00200  | 3.55120 |
| C | 1.27010  | 2.58990  | 5.11890 |
| C | 2.00010  | 2.39780  | 6.30460 |
| H | 1.93960  | 1.44830  | 6.82940 |
| C | 2.81660  | 3.40190  | 6.82250 |
| H | 3.39170  | 3.23560  | 7.72850 |
| C | 6.10330  | 4.50180  | 7.89620 |
| C | 5.72010  | 3.82850  | 5.43280 |
| C | 6.69680  | 8.07150  | 7.83000 |
| O | 7.93670  | 7.56670  | 7.67100 |
| H | 8.60460  | 8.19760  | 7.98600 |
| C | 0.39280  | 1.48820  | 4.54810 |
| C | -0.74370 | 1.11300  | 5.51540 |
| C | 1.21980  | 0.24750  | 4.16820 |
| H | -0.06320 | 1.88130  | 3.63060 |
| H | -1.35380 | 1.98730  | 5.77040 |
| H | -1.40010 | 0.36000  | 5.06310 |
| H | -0.34660 | 0.69440  | 6.44790 |
| H | 2.01720  | 0.50280  | 3.46080 |
| H | 1.68460  | -0.20350 | 5.05300 |
| H | 0.58090  | -0.51180 | 3.70160 |
| C | 7.66020  | 5.37050  | 5.98290 |
| O | 8.78960  | 5.32520  | 5.72320 |
| C | 6.47490  | 9.34200  | 8.39410 |
| H | 7.31950  | 9.94770  | 8.70620 |
| O | 5.54330  | 6.61960  | 4.70980 |
| C | 6.68970  | 5.73460  | 2.73450 |
| C | 5.36490  | 6.13620  | 3.40080 |
| H | 4.71010  | 5.24270  | 3.40030 |
| H | 7.17660  | 4.91860  | 3.27870 |
| H | 6.53230  | 5.39900  | 1.70080 |
| H | 7.37930  | 6.58920  | 2.71790 |
| C | 4.65000  | 7.21150  | 2.57110 |
| H | 3.69400  | 7.48070  | 3.03600 |
| H | 5.26560  | 8.11900  | 2.50840 |
| H | 4.44820  | 6.86310  | 1.54990 |

### Mn1d-TS2-IN

Gibbs free energy: -2489.09391623 Eh

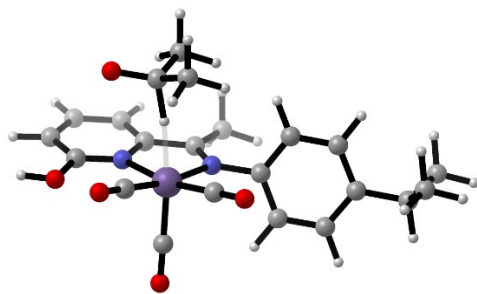

|    |         |         |         |
|----|---------|---------|---------|
| Mn | 4.75170 | 2.95990 | 2.73140 |
|----|---------|---------|---------|

|   |          |          |          |
|---|----------|----------|----------|
| C | 4.96120  | 2.35320  | -0.23150 |
| H | 4.94350  | 2.52570  | 1.02390  |
| O | 3.78770  | 2.63410  | -0.74650 |
| O | 4.10740  | 3.73320  | 5.51740  |
| O | 7.28930  | 4.49770  | 2.70350  |
| N | 3.19740  | 1.58940  | 2.55340  |
| N | 5.66450  | 1.19940  | 3.21300  |
| C | 1.39740  | -0.49340 | 2.07990  |
| H | 0.69820  | -1.30020 | 1.88480  |
| C | 2.71900  | -0.77510 | 2.45080  |
| H | 3.05920  | -1.79780 | 2.54950  |
| C | 3.58540  | 0.28410  | 2.68160  |
| C | 4.99070  | 0.10040  | 3.08580  |
| C | 4.37160  | 3.42020  | 4.43160  |
| C | 6.30440  | 3.88590  | 2.71940  |
| C | 3.92980  | 4.43330  | 2.05460  |
| O | 3.49770  | 5.40700  | 1.60070  |
| C | 1.92430  | 1.84310  | 2.23300  |
| C | 0.98880  | 0.82360  | 1.97510  |
| H | -0.02810 | 1.09030  | 1.70610  |
| C | 6.10840  | 3.30410  | -0.61470 |
| H | 5.82170  | 4.34270  | -0.42050 |
| H | 7.02810  | 3.08020  | -0.06290 |
| H | 6.31010  | 3.19640  | -1.68870 |
| C | 5.37490  | 0.87430  | -0.30450 |
| H | 4.57140  | 0.23190  | 0.06790  |
| H | 5.55110  | 0.62110  | -1.35850 |
| H | 6.28920  | 0.66540  | 0.25740  |
| C | 5.53300  | -1.27210 | 3.32900  |
| H | 4.85270  | -1.84220 | 3.96850  |
| H | 5.62430  | -1.81040 | 2.37780  |
| H | 6.51450  | -1.23350 | 3.80030  |
| C | 7.03760  | 1.19030  | 3.62140  |
| C | 8.04770  | 0.83900  | 2.72080  |
| C | 7.36850  | 1.62070  | 4.90850  |
| C | 9.38410  | 0.91730  | 3.11440  |
| H | 7.78780  | 0.51330  | 1.71940  |
| C | 8.71020  | 1.68320  | 5.29190  |
| H | 6.58220  | 1.90360  | 5.60160  |
| C | 9.74080  | 1.34020  | 4.40500  |
| H | 10.15640 | 0.64510  | 2.40040  |
| H | 8.95840  | 2.01200  | 6.29820  |
| C | 11.19700 | 1.43400  | 4.82910  |
| C | 11.95760 | 2.48050  | 3.99570  |
| C | 11.89750 | 0.06600  | 4.76140  |
| H | 11.20760 | 1.76580  | 5.87500  |
| H | 11.47960 | 3.46470  | 4.06160  |
| H | 12.98990 | 2.57910  | 4.35210  |
| H | 11.99340 | 2.19210  | 2.93830  |
| H | 11.37210 | -0.68090 | 5.36760  |
| H | 11.94140 | -0.30520 | 3.73050  |
| H | 12.92610 | 0.14350  | 5.13310  |
| O | 1.58540  | 3.14330  | 2.19190  |
| H | 0.66270  | 3.24670  | 1.90640  |

**Mn1d-TS3-IN-R**

Gibbs free energy: -2680.69826142 Eh

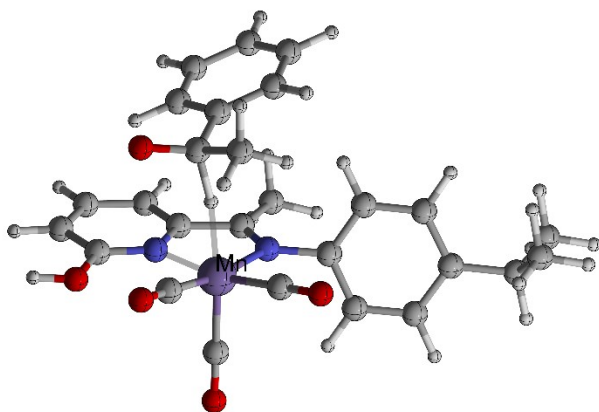

|    |          |          |          |
|----|----------|----------|----------|
| Mn | 4.74950  | 2.92910  | 2.73040  |
| C  | 5.04380  | 2.41970  | -0.27130 |
| H  | 5.01900  | 2.51890  | 1.03160  |
| O  | 3.88400  | 2.74130  | -0.77030 |
| O  | 4.00980  | 3.69330  | 5.49570  |
| O  | 7.26420  | 4.50120  | 2.77580  |
| N  | 3.21330  | 1.54090  | 2.51880  |
| N  | 5.66820  | 1.17990  | 3.23780  |
| C  | 1.41360  | -0.56190 | 2.13510  |
| H  | 0.71420  | -1.37630 | 1.97600  |
| C  | 2.72820  | -0.82480 | 2.53630  |
| H  | 3.06680  | -1.84130 | 2.68740  |
| C  | 3.59770  | 0.24300  | 2.71100  |
| C  | 5.00260  | 0.07410  | 3.11970  |
| C  | 4.31170  | 3.38050  | 4.41930  |
| C  | 6.28820  | 3.87430  | 2.76460  |
| C  | 3.93130  | 4.39780  | 2.04260  |
| O  | 3.50260  | 5.37760  | 1.59740  |
| C  | 1.94530  | 1.77830  | 2.16430  |
| C  | 1.01230  | 0.74880  | 1.94560  |
| H  | 0.00110  | 1.00200  | 1.64400  |
| C  | 6.18900  | 3.40200  | -0.56220 |
| H  | 5.83970  | 4.41730  | -0.35500 |
| H  | 7.08250  | 3.21220  | 0.03870  |
| H  | 6.45530  | 3.33720  | -1.62480 |
| C  | 5.55220  | -1.29200 | 3.37890  |
| H  | 4.87080  | -1.86370 | 4.01550  |
| H  | 5.65600  | -1.83230 | 2.43020  |
| H  | 6.52900  | -1.24370 | 3.85920  |
| C  | 7.03660  | 1.18410  | 3.66070  |
| C  | 8.05290  | 0.78710  | 2.78750  |
| C  | 7.35660  | 1.66870  | 4.93130  |
| C  | 9.38580  | 0.87680  | 3.18970  |
| H  | 7.79610  | 0.41810  | 1.80170  |
| C  | 8.69500  | 1.74120  | 5.32470  |
| H  | 6.56540  | 1.98620  | 5.60350  |
| C  | 9.73250  | 1.35500  | 4.46360  |
| H  | 10.16340 | 0.56930  | 2.49590  |

|   |          |          |          |
|---|----------|----------|----------|
| H | 8.93530  | 2.11270  | 6.31800  |
| C | 11.18490 | 1.46160  | 4.89750  |
| C | 11.95810 | 2.46800  | 4.02700  |
| C | 11.88030 | 0.08920  | 4.89610  |
| H | 11.18700 | 1.83830  | 5.92820  |
| H | 11.48290 | 3.45560  | 4.04450  |
| H | 12.98690 | 2.57890  | 4.38960  |
| H | 12.00380 | 2.13330  | 2.98380  |
| H | 11.34790 | -0.62740 | 5.53220  |
| H | 11.92900 | -0.32860 | 3.88350  |
| H | 12.90680 | 0.17940  | 5.27090  |
| O | 1.60870  | 3.07520  | 2.05010  |
| H | 0.68950  | 3.16370  | 1.74920  |
| C | 5.41410  | 0.93570  | -0.36740 |
| C | 4.38380  | -0.01610 | -0.33640 |
| C | 6.73490  | 0.48500  | -0.50860 |
| C | 4.66160  | -1.38040 | -0.42970 |
| H | 3.35890  | 0.32520  | -0.23660 |
| C | 7.01730  | -0.88160 | -0.61490 |
| H | 7.55580  | 1.19290  | -0.54010 |
| C | 5.98280  | -1.82070 | -0.56960 |
| H | 3.84840  | -2.10040 | -0.38760 |
| H | 8.04750  | -1.20940 | -0.72840 |
| H | 6.20260  | -2.88240 | -0.64370 |

### Mn1d-TS3-IN-S

Gibbs free energy: -2680.69542972 Eh

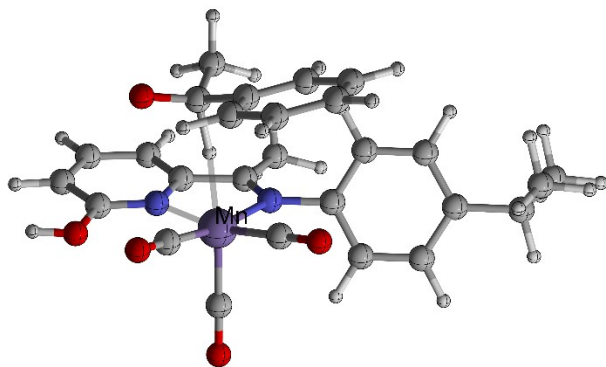

|    |         |          |          |
|----|---------|----------|----------|
| Mn | 4.65670 | 2.95420  | 2.75140  |
| C  | 5.04900 | 2.42010  | -0.22670 |
| H  | 4.94850 | 2.56520  | 1.05030  |
| O  | 3.96390 | 2.83980  | -0.81540 |
| O  | 3.89850 | 3.67790  | 5.52280  |
| O  | 7.12950 | 4.59500  | 2.79470  |
| N  | 3.15460 | 1.53210  | 2.50460  |
| N  | 5.61610 | 1.21240  | 3.24480  |
| C  | 1.43430 | -0.60790 | 1.98580  |
| H  | 0.76700 | -1.43690 | 1.77300  |
| C  | 2.74450 | -0.84620 | 2.42040  |

|   |          |          |          |
|---|----------|----------|----------|
| H | 3.10700  | -1.85770 | 2.55050  |
| C | 3.57200  | 0.24000  | 2.67050  |
| C | 4.96810  | 0.09630  | 3.11770  |
| C | 4.20720  | 3.38380  | 4.44310  |
| C | 6.17360  | 3.93970  | 2.78560  |
| C | 3.80900  | 4.40590  | 2.06450  |
| O | 3.36060  | 5.36920  | 1.60390  |
| C | 1.89070  | 1.74400  | 2.12240  |
| C | 0.99610  | 0.69550  | 1.83890  |
| H | -0.01350 | 0.92990  | 1.51740  |
| C | 5.52720  | -1.26270 | 3.40100  |
| H | 4.82460  | -1.83910 | 4.00980  |
| H | 5.68170  | -1.81170 | 2.46460  |
| H | 6.48010  | -1.19940 | 3.92540  |
| C | 6.99330  | 1.23480  | 3.63380  |
| C | 7.98290  | 0.73830  | 2.77850  |
| C | 7.35680  | 1.83930  | 4.84030  |
| C | 9.32750  | 0.85850  | 3.12810  |
| H | 7.69970  | 0.27240  | 1.84120  |
| C | 8.70630  | 1.93810  | 5.18510  |
| H | 6.59010  | 2.23250  | 5.50030  |
| C | 9.71520  | 1.46220  | 4.33490  |
| H | 10.08180 | 0.47890  | 2.44450  |
| H | 8.97860  | 2.40550  | 6.12830  |
| C | 11.18120 | 1.61210  | 4.70470  |
| C | 11.91310 | 2.53780  | 3.71640  |
| C | 11.88700 | 0.24870  | 4.80360  |
| H | 11.21810 | 2.08250  | 5.69540  |
| H | 11.43140 | 3.52070  | 3.66170  |
| H | 12.95420 | 2.68540  | 4.02720  |
| H | 11.92080 | 2.10870  | 2.70730  |
| H | 11.38260 | -0.40960 | 5.52040  |
| H | 11.90530 | -0.25950 | 3.83220  |
| H | 12.92480 | 0.37810  | 5.13300  |
| O | 1.51700  | 3.03270  | 2.04080  |
| H | 0.60700  | 3.10310  | 1.70870  |
| C | 6.30410  | 3.28550  | -0.41890 |
| C | 7.60200  | 2.78690  | -0.23590 |
| C | 6.14530  | 4.64090  | -0.74010 |
| C | 8.71440  | 3.62510  | -0.36650 |
| H | 7.75890  | 1.74540  | 0.01850  |
| C | 7.25340  | 5.48240  | -0.86620 |
| H | 5.14250  | 5.02980  | -0.88440 |
| C | 8.54540  | 4.97750  | -0.67810 |
| H | 9.71250  | 3.21990  | -0.22040 |
| H | 7.10920  | 6.53230  | -1.10950 |
| H | 9.40910  | 5.63020  | -0.77380 |
| C | 5.28540  | 0.90360  | -0.29980 |
| H | 5.59180  | 0.64620  | -1.32170 |
| H | 6.04700  | 0.54140  | 0.39310  |
| H | 4.34450  | 0.39070  | -0.08380 |

### Mn1d-INT-IV-S

Gibbs free energy: -2680.72077660 Eh

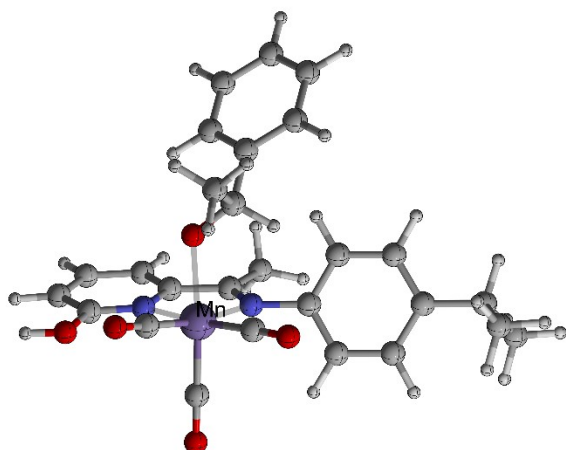

|    |          |          |         |
|----|----------|----------|---------|
| Mn | 5.99330  | 5.33150  | 6.43750 |
| O  | 6.17950  | 3.96600  | 9.06490 |
| O  | 5.73990  | 2.72690  | 5.05280 |
| N  | 5.85340  | 7.27630  | 7.44140 |
| N  | 3.89670  | 5.70300  | 6.62360 |
| C  | 5.40260  | 9.85350  | 8.38880 |
| H  | 5.22930  | 10.86230 | 8.75000 |
| C  | 4.33050  | 9.06910  | 7.94300 |
| H  | 3.32210  | 9.46110  | 7.95750 |
| C  | 4.59000  | 7.78320  | 7.48250 |
| C  | 3.51580  | 6.87230  | 7.02280 |
| C  | 2.09180  | 7.33930  | 7.07820 |
| H  | 1.39710  | 6.51790  | 6.90690 |
| H  | 1.87840  | 7.78340  | 8.05490 |
| H  | 1.91440  | 8.10860  | 6.31750 |
| C  | 2.97780  | 4.74670  | 6.10350 |
| C  | 2.28540  | 4.99300  | 4.91400 |
| H  | 2.40760  | 5.94410  | 4.40660 |
| C  | 1.46170  | 4.00210  | 4.37480 |
| H  | 0.93670  | 4.20080  | 3.44340 |
| C  | 1.30390  | 2.76000  | 5.00470 |
| C  | 2.00650  | 2.53440  | 6.20120 |
| H  | 1.90870  | 1.58190  | 6.71470 |
| C  | 2.84510  | 3.50740  | 6.74220 |
| H  | 3.40010  | 3.31320  | 7.65500 |
| C  | 6.10170  | 4.49920  | 8.03390 |
| C  | 5.82390  | 3.75780  | 5.58090 |
| C  | 6.86250  | 8.02060  | 7.89070 |
| O  | 8.07400  | 7.43030  | 7.85230 |
| H  | 8.76020  | 8.03530  | 8.17830 |
| C  | 0.41020  | 1.68860  | 4.40280 |
| C  | -0.74370 | 1.31450  | 5.34920 |
| C  | 1.21850  | 0.44060  | 4.00560 |
| H  | -0.02770 | 2.10970  | 3.48890 |
| H  | -1.33980 | 2.19450  | 5.61720 |
| H  | -1.40960 | 0.58530  | 4.87250 |
| H  | -0.36580 | 0.86700  | 6.27620 |
| H  | 2.02760  | 0.69570  | 3.31160 |
| H  | 1.66610  | -0.03620 | 4.88580 |
| H  | 0.57090  | -0.29720 | 3.51700 |

|   |         |          |         |
|---|---------|----------|---------|
| C | 7.77840 | 5.25570  | 6.14300 |
| O | 8.90620 | 5.17110  | 5.88900 |
| C | 6.68330 | 9.33020  | 8.37480 |
| H | 7.54040 | 9.89890  | 8.72070 |
| O | 5.81930 | 6.53650  | 4.74960 |
| C | 6.62340 | 5.63190  | 2.64180 |
| C | 5.41320 | 6.00950  | 3.52010 |
| H | 4.81400 | 5.09130  | 3.65190 |
| H | 7.23700 | 4.88570  | 3.16040 |
| H | 6.31660 | 5.21230  | 1.67570 |
| H | 7.24270 | 6.51830  | 2.45470 |
| C | 4.49550 | 6.98150  | 2.77760 |
| C | 3.68400 | 6.51890  | 1.72890 |
| C | 4.42730 | 8.33640  | 3.12520 |
| C | 2.83050 | 7.38610  | 1.04200 |
| H | 3.71090 | 5.46530  | 1.45840 |
| C | 3.57540 | 9.21110  | 2.43920 |
| H | 5.03700 | 8.69840  | 3.94650 |
| C | 2.77330 | 8.74060  | 1.39500 |
| H | 2.20450 | 7.00550  | 0.23850 |
| H | 3.53510 | 10.25950 | 2.72540 |
| H | 2.10680 | 9.41710  | 0.86620 |

### Mn1d-INT-IV-S

Gibbs free energy: -2680.72423501 Eh

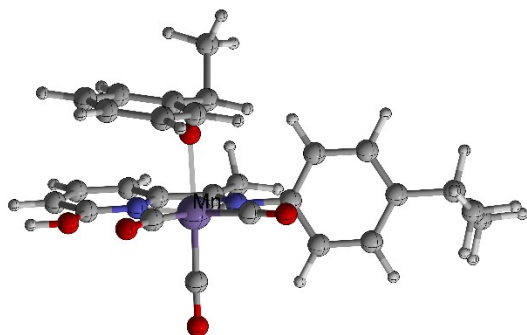

|    |         |          |         |
|----|---------|----------|---------|
| Mn | 5.76590 | 5.15670  | 6.03690 |
| O  | 6.25240 | 3.73330  | 8.59450 |
| O  | 5.25260 | 2.60430  | 4.63130 |
| N  | 5.76870 | 7.10320  | 7.10350 |
| N  | 3.73550 | 5.50400  | 6.58200 |
| C  | 5.43180 | 9.62560  | 8.23130 |
| H  | 5.30200 | 10.61200 | 8.66560 |
| C  | 4.31830 | 8.81500  | 7.97300 |
| H  | 3.32000 | 9.16230  | 8.20490 |
| C  | 4.52400 | 7.56040  | 7.41080 |
| C  | 3.40610 | 6.63410  | 7.11030 |
| C  | 2.00240 | 7.04450  | 7.43940 |
| H  | 1.30400 | 6.22220  | 7.28700 |
| H  | 1.93890 | 7.37300  | 8.48170 |
| H  | 1.69510 | 7.88560  | 6.80740 |

|   |          |          |         |
|---|----------|----------|---------|
| C | 2.76320  | 4.54360  | 6.17880 |
| C | 2.00550  | 4.75440  | 5.02360 |
| H | 2.11290  | 5.68380  | 4.47300 |
| C | 1.12740  | 3.76020  | 4.58350 |
| H | 0.54430  | 3.93060  | 3.68160 |
| C | 0.98490  | 2.55090  | 5.27760 |
| C | 1.75830  | 2.36100  | 6.43570 |
| H | 1.67390  | 1.43440  | 6.99680 |
| C | 2.64780  | 3.33830  | 6.88080 |
| H | 3.25560  | 3.17340  | 7.76540 |
| C | 6.05980  | 4.29130  | 7.59210 |
| C | 5.44760  | 3.61410  | 5.17070 |
| C | 6.82120  | 7.87440  | 7.36850 |
| O | 8.02010  | 7.34240  | 7.05640 |
| H | 8.73590  | 7.95880  | 7.28230 |
| C | 0.02820  | 1.47780  | 4.78490 |
| C | -1.07400 | 1.18430  | 5.81760 |
| C | 0.77610  | 0.18880  | 4.40130 |
| H | -0.45490 | 1.86710  | 3.87970 |
| H | -1.62850 | 2.09370  | 6.07670 |
| H | -1.78740 | 0.45260  | 5.42030 |
| H | -0.65040 | 0.77200  | 6.74120 |
| H | 1.54660  | 0.38600  | 3.64710 |
| H | 1.26510  | -0.25890 | 5.27480 |
| H | 0.07950  | -0.55180 | 3.99060 |
| C | 7.52820  | 4.99770  | 5.62300 |
| O | 8.65310  | 4.78960  | 5.43080 |
| C | 6.69920  | 9.15790  | 7.93320 |
| H | 7.58900  | 9.75010  | 8.12130 |
| O | 5.24410  | 6.36250  | 4.45470 |
| C | 5.37900  | 5.95920  | 3.11750 |
| H | 4.89480  | 4.97920  | 2.94590 |
| C | 6.84040  | 5.80270  | 2.70900 |
| C | 7.32400  | 4.59110  | 2.20040 |
| C | 7.73960  | 6.86930  | 2.86940 |
| C | 8.67420  | 4.43990  | 1.86210 |
| H | 6.64000  | 3.75370  | 2.08130 |
| C | 9.08650  | 6.72700  | 2.53130 |
| H | 7.38230  | 7.81100  | 3.27820 |
| C | 9.56070  | 5.50810  | 2.02760 |
| H | 9.03320  | 3.48830  | 1.47750 |
| H | 9.77020  | 7.56190  | 2.66510 |
| H | 10.61050 | 5.39390  | 1.77050 |
| C | 4.66340  | 6.97500  | 2.21280 |
| H | 5.10650  | 7.97200  | 2.32620 |
| H | 4.72970  | 6.68630  | 1.15640 |
| H | 3.60380  | 7.03600  | 2.48810 |

### Mn1d-TS4-IN-R

Gibbs free energy: -2680.71973569 Eh

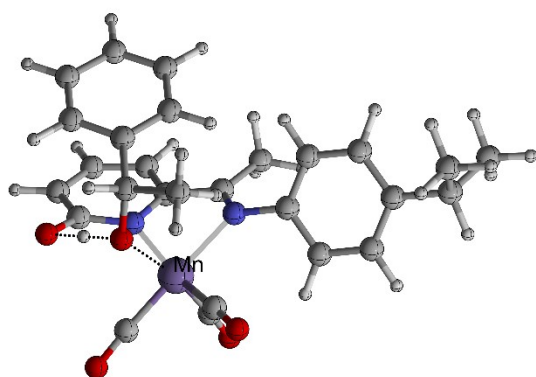

|    |          |          |         |
|----|----------|----------|---------|
| Mn | 4.48710  | 3.42230  | 3.03310 |
| O  | 1.64810  | 3.22530  | 1.21440 |
| O  | 4.31882  | 3.15061  | 5.98173 |
| O  | 6.83757  | 5.23443  | 3.06603 |
| N  | 2.95217  | 1.95128  | 2.62348 |
| N  | 5.48389  | 1.48552  | 3.19517 |
| C  | 1.02229  | -0.04400 | 2.63224 |
| H  | 0.25825  | -0.81517 | 2.66734 |
| C  | 2.30870  | -0.30796 | 3.13742 |
| H  | 2.55780  | -1.28964 | 3.51839 |
| C  | 3.25200  | 0.70976  | 3.09858 |
| C  | 4.67835  | 0.49082  | 3.42912 |
| C  | 4.40735  | 3.24820  | 4.82952 |
| C  | 5.93961  | 4.50298  | 3.07790 |
| C  | 3.40786  | 4.87404  | 3.20633 |
| O  | 2.73464  | 5.79825  | 3.38626 |
| C  | 1.78067  | 2.15045  | 1.96178 |
| C  | 0.75706  | 1.16838  | 2.02838 |
| H  | -0.19477 | 1.37810  | 1.55179 |
| C  | 5.09613  | -0.84084 | 3.97840 |
| H  | 4.39844  | -1.15149 | 4.76139 |
| H  | 5.07733  | -1.60696 | 3.19510 |
| H  | 6.10055  | -0.80211 | 4.39893 |
| C  | 6.89539  | 1.33944  | 3.36350 |
| C  | 7.61488  | 0.40332  | 2.60504 |
| C  | 7.59084  | 2.16092  | 4.25810 |
| C  | 9.00084  | 0.31264  | 2.72618 |
| H  | 7.09220  | -0.25884 | 1.92480 |
| C  | 8.97723  | 2.04976  | 4.38142 |
| H  | 7.05704  | 2.87254  | 4.87652 |
| C  | 9.71157  | 1.13611  | 3.61342 |
| H  | 9.53040  | -0.41582 | 2.11836 |
| H  | 9.49548  | 2.69206  | 5.08929 |
| C  | 11.22220 | 1.04260  | 3.74221 |
| C  | 11.92295 | 1.40753  | 2.42170 |
| C  | 11.66366 | -0.34813 | 4.23057 |
| H  | 11.52741 | 1.77682  | 4.49844 |
| H  | 11.63260 | 2.40803  | 2.08105 |
| H  | 13.01197 | 1.39409  | 2.54869 |
| H  | 11.66864 | 0.69357  | 1.62922 |

|   |          |          |          |
|---|----------|----------|----------|
| H | 11.18682 | -0.60464 | 5.18358  |
| H | 11.40242 | -1.12465 | 3.50179  |
| H | 12.75013 | -0.37648 | 4.37552  |
| C | 6.32417  | 3.41478  | -0.06058 |
| C | 4.81558  | 3.22469  | -0.15707 |
| H | 6.55415  | 4.48038  | 0.03783  |
| H | 6.74220  | 2.89445  | 0.80683  |
| H | 6.82119  | 3.03824  | -0.96164 |
| H | 4.44839  | 3.81658  | -1.00827 |
| O | 4.19610  | 3.79280  | 1.01260  |
| H | 2.92090  | 3.50950  | 1.11050  |
| C | 4.36561  | 1.78857  | -0.38351 |
| C | 3.12750  | 1.54709  | -0.99770 |
| C | 5.11888  | 0.69201  | 0.04913  |
| C | 2.63007  | 0.24781  | -1.12477 |
| H | 2.53931  | 2.38621  | -1.35946 |
| C | 4.63140  | -0.61145 | -0.07764 |
| H | 6.09036  | 0.85586  | 0.49455  |
| C | 3.37800  | -0.83764 | -0.65473 |
| H | 1.66087  | 0.08254  | -1.58815 |
| H | 5.22834  | -1.44813 | 0.27608  |
| H | 2.99098  | -1.84916 | -0.74562 |

### Mn1d-TS4-IN-R

Gibbs free energy: -2680.72317047 Eh

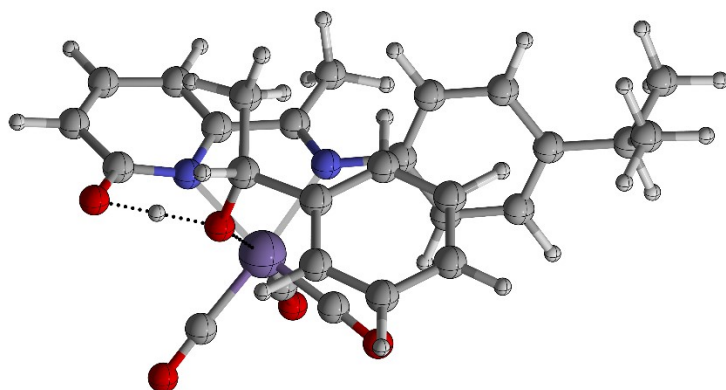

|    |         |          |         |
|----|---------|----------|---------|
| Mn | 4.48710 | 3.42230  | 3.03310 |
| O  | 1.64810 | 3.22530  | 1.21440 |
| O  | 4.36018 | 3.16998  | 5.98524 |
| O  | 6.91603 | 5.13275  | 3.13497 |
| N  | 2.91982 | 1.97066  | 2.66157 |
| N  | 5.43773 | 1.46171  | 3.18103 |
| C  | 0.93648 | 0.03189  | 2.76159 |
| H  | 0.14944 | -0.71266 | 2.83849 |
| C  | 2.22157 | -0.25094 | 3.26343 |

|   |          |          |          |
|---|----------|----------|----------|
| H | 2.44835  | -1.22387 | 3.67988  |
| C | 3.19168  | 0.73725  | 3.17422  |
| C | 4.62137  | 0.48985  | 3.46537  |
| C | 4.42683  | 3.25700  | 4.83042  |
| C | 5.98469  | 4.44683  | 3.08982  |
| C | 3.45514  | 4.90742  | 3.20205  |
| O | 2.80876  | 5.85322  | 3.36896  |
| C | 1.75287  | 2.17491  | 1.99840  |
| C | 0.70059  | 1.22623  | 2.11103  |
| H | -0.25073 | 1.44602  | 1.63786  |
| C | 5.03545  | -0.84254 | 4.01537  |
| H | 4.36968  | -1.12417 | 4.83662  |
| H | 4.96243  | -1.62223 | 3.24882  |
| H | 6.06004  | -0.81788 | 4.38584  |
| C | 6.84931  | 1.26686  | 3.26190  |
| C | 7.47741  | 0.36108  | 2.39600  |
| C | 7.62577  | 2.01021  | 4.15520  |
| C | 8.86332  | 0.21716  | 2.41595  |
| H | 6.87729  | -0.21121 | 1.69548  |
| C | 9.01324  | 1.84862  | 4.17279  |
| H | 7.15454  | 2.69886  | 4.84753  |
| C | 9.65955  | 0.96060  | 3.30221  |
| H | 9.32722  | -0.47938 | 1.72311  |
| H | 9.60286  | 2.43038  | 4.87721  |
| C | 11.17243 | 0.82150  | 3.31156  |
| C | 11.78764 | 1.32025  | 1.99175  |
| C | 11.61198 | -0.62230 | 3.60931  |
| H | 11.54992 | 1.46100  | 4.11947  |
| H | 11.51144 | 2.36177  | 1.79352  |
| H | 12.88189 | 1.26080  | 2.03241  |
| H | 11.44952 | 0.71170  | 1.14458  |
| H | 11.19338 | -0.97803 | 4.55786  |
| H | 11.28619 | -1.30748 | 2.81769  |
| H | 12.70468 | -0.68371 | 3.67547  |
| C | 4.84951  | 3.22332  | -0.13067 |
| C | 4.69636  | 1.70737  | -0.20486 |
| H | 4.34880  | 3.65723  | -1.00958 |
| H | 3.63378  | 1.44786  | -0.24007 |
| H | 5.17069  | 1.31655  | -1.11261 |
| H | 5.13943  | 1.21240  | 0.66136  |
| O | 4.19860  | 3.79010  | 1.01540  |
| H | 2.92360  | 3.50630  | 1.11550  |
| C | 6.28155  | 3.73508  | -0.12051 |
| C | 6.50144  | 5.10863  | -0.31732 |
| C | 7.38288  | 2.91433  | 0.14546  |
| C | 7.78482  | 5.64978  | -0.23167 |
| H | 5.65433  | 5.75764  | -0.52681 |
| C | 8.67184  | 3.45153  | 0.24061  |
| H | 7.24506  | 1.85082  | 0.29124  |
| C | 8.87717  | 4.82084  | 0.05636  |
| H | 7.93458  | 6.71565  | -0.38371 |
| H | 9.51047  | 2.79796  | 0.46309  |
| H | 9.87717  | 5.23983  | 0.13205  |

## 9.4. Geometries for transition states of the outer sphere reaction pathway using Mn1c

### Mn1c

Gibbs free energy: -5105.211943 Eh

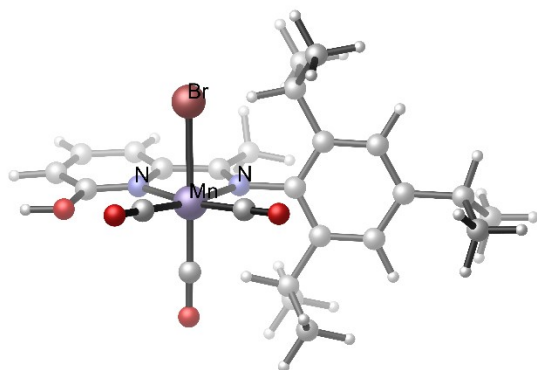

|    |          |          |         |
|----|----------|----------|---------|
| Mn | 5.79400  | 5.17870  | 6.33170 |
| O  | 6.02490  | 3.93270  | 8.99900 |
| O  | 5.52550  | 2.56440  | 4.95420 |
| N  | 5.68170  | 7.10060  | 7.15370 |
| N  | 3.77650  | 5.47890  | 6.49120 |
| C  | 5.21820  | 9.71910  | 8.01000 |
| H  | 5.04310  | 10.73990 | 8.33440 |
| C  | 4.14480  | 8.89440  | 7.65100 |
| H  | 3.12730  | 9.26070  | 7.69660 |
| C  | 4.41220  | 7.59610  | 7.23650 |
| C  | 3.35240  | 6.64080  | 6.86680 |
| C  | 1.91300  | 7.04250  | 6.95650 |
| H  | 1.25280  | 6.19020  | 6.79940 |
| H  | 1.70080  | 7.47870  | 7.93760 |
| H  | 1.68730  | 7.80310  | 6.19980 |
| C  | 2.87290  | 4.44860  | 6.08650 |
| C  | 2.28860  | 4.48260  | 4.81880 |
| C  | 1.47100  | 3.42510  | 4.40980 |
| H  | 1.02200  | 3.45570  | 3.41990 |
| C  | 1.22140  | 2.32770  | 5.24540 |
| C  | 1.82160  | 2.31660  | 6.51610 |
| H  | 1.64920  | 1.48120  | 7.18900 |
| C  | 2.64780  | 3.35910  | 6.93490 |
| C  | 5.92380  | 4.42270  | 7.94960 |
| C  | 5.61720  | 3.58360  | 5.49850 |
| C  | 6.69350  | 7.88870  | 7.52690 |
| O  | 7.91650  | 7.32930  | 7.46870 |
| H  | 8.59640  | 7.96330  | 7.75040 |
| C  | 0.33220  | 1.18440  | 4.78550 |
| C  | -0.91760 | 1.04880  | 5.67290 |
| C  | 1.10640  | -0.14390 | 4.72410 |
| H  | -0.00280 | 1.42480  | 3.76850 |

|    |          |          |          |
|----|----------|----------|----------|
| H  | -1.48860 | 1.98410  | 5.70130  |
| H  | -1.57620 | 0.25980  | 5.29070  |
| H  | -0.64450 | 0.78800  | 6.70250  |
| H  | 1.98490  | -0.06210 | 4.07380  |
| H  | 1.45030  | -0.44720 | 5.72010  |
| H  | 0.46640  | -0.94360 | 4.33250  |
| C  | 7.58730  | 5.07380  | 6.04570  |
| O  | 8.71210  | 4.92650  | 5.81050  |
| C  | 6.50560  | 9.21520  | 7.95720  |
| H  | 7.36720  | 9.81220  | 8.23840  |
| Br | 5.65410  | 6.31720  | 4.01490  |
| C  | 2.57430  | 5.67160  | 3.88270  |
| C  | 1.43640  | 6.65680  | 3.96020  |
| C  | 2.78280  | 5.16660  | 2.47810  |
| H  | 3.51670  | 6.15900  | 4.24880  |
| H  | 1.30220  | 7.01570  | 5.00900  |
| H  | 1.63610  | 7.54080  | 3.30750  |
| H  | 0.48220  | 6.18320  | 3.62440  |
| H  | 3.62970  | 4.43960  | 2.44690  |
| H  | 1.86370  | 4.65410  | 2.10380  |
| H  | 3.01750  | 6.01180  | 1.78680  |
| C  | 3.31720  | 3.32280  | 8.32130  |
| C  | 3.78980  | 1.92200  | 8.61460  |
| C  | 2.34440  | 3.81470  | 9.36210  |
| H  | 4.20030  | 4.01410  | 8.27810  |
| H  | 4.50820  | 1.58090  | 7.83080  |
| H  | 4.30240  | 1.87910  | 9.60590  |
| H  | 2.92770  | 1.21220  | 8.63610  |
| H  | 2.00960  | 4.85280  | 9.12310  |
| H  | 1.44460  | 3.15430  | 9.40300  |
| H  | 2.81940  | 3.82100  | 10.37290 |

### Mn1c-I

Gibbs free energy: -2530.55182730 Eh

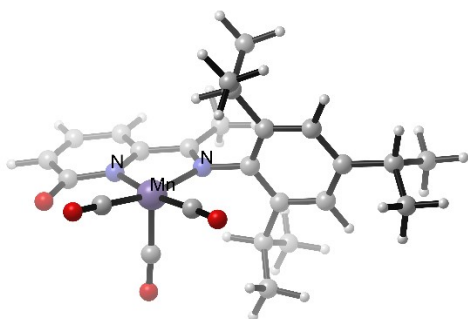

|    |         |         |         |
|----|---------|---------|---------|
| Mn | 5.71605 | 5.34173 | 6.12180 |
| O  | 6.79989 | 4.06530 | 8.52837 |
| O  | 5.50179 | 2.71737 | 4.72784 |
| N  | 5.62207 | 7.15879 | 6.98550 |

|   |          |          |          |
|---|----------|----------|----------|
| N | 3.74031  | 5.46467  | 6.52423  |
| C | 5.18269  | 9.64031  | 8.20791  |
| H | 5.00498  | 10.60642 | 8.67236  |
| C | 4.09562  | 8.76641  | 7.95900  |
| H | 3.08531  | 9.04356  | 8.23170  |
| C | 4.36211  | 7.55428  | 7.35861  |
| C | 3.31154  | 6.56972  | 7.05647  |
| C | 1.87673  | 6.85915  | 7.35897  |
| H | 1.23021  | 6.04296  | 7.04066  |
| H | 1.75186  | 7.01205  | 8.43663  |
| H | 1.56284  | 7.78141  | 6.85989  |
| C | 2.83285  | 4.42825  | 6.11398  |
| C | 2.34502  | 4.44293  | 4.79449  |
| C | 1.50237  | 3.39605  | 4.39790  |
| H | 1.10505  | 3.39255  | 3.38613  |
| C | 1.15597  | 2.35209  | 5.26170  |
| C | 1.68440  | 2.36304  | 6.55892  |
| H | 1.43643  | 1.55518  | 7.24140  |
| C | 2.52765  | 3.38529  | 7.00721  |
| C | 6.36419  | 4.53465  | 7.56119  |
| C | 5.55788  | 3.74932  | 5.24991  |
| C | 6.71247  | 7.96353  | 7.26242  |
| O | 7.88516  | 7.58093  | 6.99970  |
| C | 0.23927  | 1.23144  | 4.79758  |
| C | -1.05150 | 1.17257  | 5.63294  |
| C | 0.96008  | -0.12802 | 4.80879  |
| H | -0.04232 | 1.45301  | 3.76017  |
| H | -1.58243 | 2.13139  | 5.61217  |
| H | -1.72707 | 0.40153  | 5.24358  |
| H | -0.83395 | 0.92961  | 6.67988  |
| H | 1.86731  | -0.10154 | 4.19416  |
| H | 1.25064  | -0.41207 | 5.82731  |
| H | 0.30529  | -0.91460 | 4.41498  |
| C | 7.40871  | 5.51817  | 5.43521  |
| O | 8.44116  | 5.51645  | 4.91392  |
| C | 6.45166  | 9.25574  | 7.86593  |
| H | 7.30922  | 9.89496  | 8.05047  |
| C | 2.70340  | 5.55291  | 3.81459  |
| C | 1.48430  | 6.44578  | 3.52241  |
| C | 3.30818  | 5.00016  | 2.51338  |
| H | 3.46597  | 6.18581  | 4.27886  |
| H | 1.07289  | 6.86928  | 4.44479  |
| H | 1.76576  | 7.27523  | 2.86280  |
| H | 0.68998  | 5.87434  | 3.02742  |
| H | 4.18605  | 4.37766  | 2.71694  |
| H | 2.58435  | 4.39517  | 1.95588  |
| H | 3.62200  | 5.82628  | 1.86454  |
| C | 3.10060  | 3.34370  | 8.41627  |
| C | 3.96347  | 2.08668  | 8.62304  |
| C | 1.99309  | 3.43980  | 9.47944  |
| H | 3.74971  | 4.21363  | 8.54405  |
| H | 4.74563  | 2.01386  | 7.85966  |
| H | 4.44746  | 2.11249  | 9.60621  |
| H | 3.35548  | 1.17605  | 8.57153  |
| H | 1.39657  | 4.34941  | 9.34732  |
| H | 1.31554  | 2.57952  | 9.42712  |
| H | 2.43048  | 3.46338  | 10.48463 |

## Mn1c-TS2-OUT

Gibbs free energy: -2724.70400909 Eh

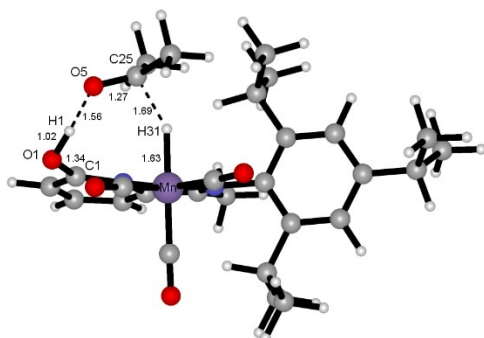

|    |         |          |          |
|----|---------|----------|----------|
| Mn | 4.71680 | 2.88580  | 2.80270  |
| O  | 1.87780 | 2.68880  | 0.98400  |
| C  | 4.96110 | 2.76770  | -0.39470 |
| H  | 5.22880 | 2.68930  | 1.27130  |
| O  | 3.83990 | 3.33720  | -0.55480 |
| H  | 2.67630 | 2.92150  | 0.39530  |
| O  | 3.82040 | 3.30220  | 5.61580  |
| O  | 7.14710 | 4.55040  | 3.01760  |
| N  | 3.27920 | 1.42840  | 2.33910  |
| N  | 5.65000 | 1.14160  | 3.31090  |
| C  | 1.34280 | -0.58490 | 2.42420  |
| H  | 0.57930 | -1.35470 | 2.47780  |
| C  | 2.61720 | -0.81160 | 2.96080  |
| H  | 2.86650 | -1.76070 | 3.41860  |
| C  | 3.55580 | 0.20990  | 2.89580  |
| C  | 4.94100 | 0.06080  | 3.37320  |
| C  | 4.15580 | 3.11440  | 4.51880  |
| C  | 6.19030 | 3.88960  | 2.97330  |
| C  | 3.82850 | 4.36070  | 2.26550  |
| O  | 3.31970 | 5.35910  | 1.95540  |
| C  | 2.10400 | 1.58420  | 1.70740  |
| C  | 1.08750 | 0.61230  | 1.77800  |
| H  | 0.14140 | 0.81340  | 1.28780  |
| C  | 6.21630 | 3.57460  | -0.65300 |
| H  | 6.10120 | 4.59200  | -0.27110 |
| H  | 7.10250 | 3.11030  | -0.21420 |
| H  | 6.35680 | 3.62650  | -1.74240 |
| C  | 5.06360 | 1.26550  | -0.56240 |
| H  | 4.17730 | 0.76360  | -0.16910 |
| H  | 5.11800 | 1.06790  | -1.64320 |
| H  | 5.96220 | 0.85770  | -0.09400 |
| C  | 5.43870 | -1.26910 | 3.84560  |
| H  | 4.82360 | -1.62590 | 4.67910  |
| H  | 5.36240 | -2.00890 | 3.04090  |
| H  | 6.47570 | -1.21180 | 4.17490  |
| C  | 7.02890 | 1.15030  | 3.68890  |
| C  | 8.01070 | 0.90510  | 2.72430  |
| C  | 7.39480 | 1.48700  | 4.99330  |
| C  | 9.35880 | 0.98750  | 3.07500  |
| C  | 8.74910 | 1.56490  | 5.32940  |

|   |          |          |          |
|---|----------|----------|----------|
| C | 9.75310  | 1.32040  | 4.38160  |
| H | 10.11100 | 0.79270  | 2.31550  |
| H | 9.02810  | 1.82490  | 6.34770  |
| C | 11.22180 | 1.41730  | 4.76060  |
| C | 11.94310 | 2.51250  | 3.95570  |
| C | 11.93570 | 0.06320  | 4.60390  |
| H | 11.26340 | 1.69780  | 5.82070  |
| H | 11.45250 | 3.48490  | 4.07940  |
| H | 12.98320 | 2.61150  | 4.28840  |
| H | 11.95480 | 2.27380  | 2.88550  |
| H | 11.44430 | -0.71630 | 5.19740  |
| H | 11.94020 | -0.26150 | 3.55650  |
| H | 12.97800 | 0.13760  | 4.93640  |
| C | 7.59080  | 0.55130  | 1.28550  |
| C | 7.83710  | -0.91460 | 1.03640  |
| C | 8.34760  | 1.41920  | 0.31330  |
| H | 6.49220  | 0.76550  | 1.20170  |
| H | 7.26650  | -1.53570 | 1.76810  |
| H | 7.51440  | -1.19820 | 0.00540  |
| H | 8.92290  | -1.15460 | 1.14080  |
| H | 8.14900  | 2.49880  | 0.51800  |
| H | 9.44670  | 1.24020  | 0.39900  |
| H | 8.03820  | 1.19640  | -0.73650 |
| C | 6.30410  | 1.77650  | 6.04120  |
| C | 6.68490  | 2.99730  | 6.83870  |
| C | 6.12000  | 0.56750  | 6.92210  |
| H | 5.35370  | 1.97820  | 5.47920  |
| H | 6.81520  | 3.87810  | 6.16480  |
| H | 5.89330  | 3.24050  | 7.58820  |
| H | 7.64340  | 2.82680  | 7.38600  |
| H | 5.83870  | -0.32240 | 6.30910  |
| H | 7.06390  | 0.33350  | 7.47150  |
| H | 5.31370  | 0.74740  | 7.67380  |

### Mn1c-III

Gibbs free energy: -2531.71194594 Eh

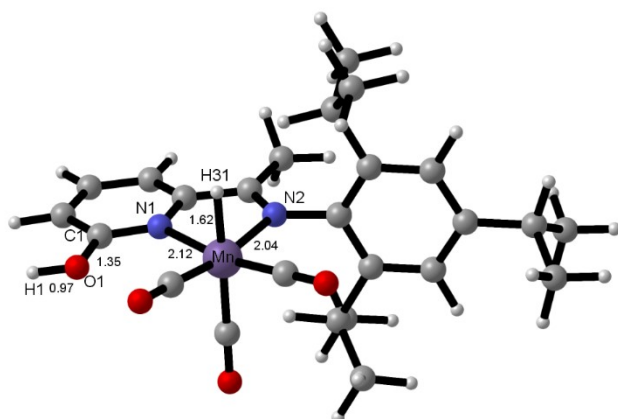

|    |         |         |         |
|----|---------|---------|---------|
| Mn | 5.76879 | 5.19121 | 6.25495 |
| O  | 6.10196 | 3.87482 | 8.91307 |
| O  | 5.47999 | 2.60935 | 4.84790 |

|   |          |          |         |
|---|----------|----------|---------|
| N | 5.66092  | 7.14215  | 7.06931 |
| N | 3.76157  | 5.55310  | 6.37886 |
| C | 5.24615  | 9.63264  | 8.27223 |
| H | 5.09942  | 10.60563 | 8.73250 |
| C | 4.14912  | 8.83598  | 7.95437 |
| H | 3.13954  | 9.16181  | 8.14001 |
| C | 4.39775  | 7.60285  | 7.29654 |
| C | 3.33728  | 6.68337  | 6.85288 |
| C | 1.89770  | 7.06860  | 6.99999 |
| H | 1.23187  | 6.28161  | 6.64741 |
| H | 1.66962  | 7.27417  | 8.04890 |
| H | 1.69485  | 7.97991  | 6.43095 |
| C | 2.86359  | 4.50701  | 5.98454 |
| C | 2.33229  | 4.45639  | 4.70089 |
| C | 1.52673  | 3.37403  | 4.32384 |
| H | 1.10806  | 3.35187  | 3.32074 |
| C | 1.24145  | 2.32487  | 5.20763 |
| C | 1.80338  | 2.38799  | 6.49377 |
| H | 1.61386  | 1.58697  | 7.20341 |
| C | 2.61221  | 3.45468  | 6.88430 |
| C | 5.93420  | 4.41869  | 7.89797 |
| C | 5.57682  | 3.62120  | 5.41605 |
| C | 6.69119  | 7.91146  | 7.45114 |
| O | 7.91215  | 7.38533  | 7.24684 |
| H | 8.60173  | 7.99550  | 7.56029 |
| C | 0.34793  | 1.16433  | 4.79332 |
| C | -0.92048 | 1.09185  | 5.66268 |
| C | 1.09521  | -0.18127 | 4.81415 |
| H | 0.03284  | 1.35478  | 3.75985 |
| H | -1.47581 | 2.03667  | 5.63622 |
| H | -1.58578 | 0.29588  | 5.30510 |
| H | -0.67083 | 0.87540  | 6.70855 |
| H | 1.99502  | -0.14849 | 4.19034 |
| H | 1.39938  | -0.45794 | 5.83073 |
| H | 0.44806  | -0.98081 | 4.43450 |
| H | 5.68816  | 5.86068  | 4.77831 |
| C | 7.53819  | 5.08498  | 5.90404 |
| O | 8.66081  | 4.93950  | 5.60436 |
| C | 6.52805  | 9.18070  | 8.02764 |
| H | 7.40139  | 9.77215  | 8.28139 |
| C | 2.60879  | 5.60980  | 3.71574 |
| C | 1.36628  | 6.47870  | 3.63156 |
| C | 3.00087  | 5.05623  | 2.35135 |
| H | 3.46410  | 6.20670  | 4.14882 |
| H | 1.09526  | 6.87932  | 4.65239 |
| H | 1.54212  | 7.34083  | 2.94007 |
| H | 0.49159  | 5.88915  | 3.23658 |
| H | 3.92878  | 4.42294  | 2.42495 |
| H | 2.17239  | 4.43068  | 1.91559 |
| H | 3.21171  | 5.88394  | 1.62682 |
| C | 3.25579  | 3.45716  | 8.28390 |
| C | 3.74403  | 2.06892  | 8.61015 |
| C | 2.25897  | 3.93614  | 9.30310 |
| H | 4.12269  | 4.16406  | 8.25127 |
| H | 4.46895  | 1.71436  | 7.83536 |
| H | 4.25183  | 2.05618  | 9.60427 |
| H | 2.88904  | 1.35111  | 8.64640 |

|   |         |         |          |
|---|---------|---------|----------|
| H | 1.92105 | 4.97382 | 9.06715  |
| H | 1.36351 | 3.27100 | 9.31889  |
| H | 2.71629 | 3.93599 | 10.32249 |

### Mn1c-TS3-OUT-R

Gibbs free energy: -2916.30587083 Eh

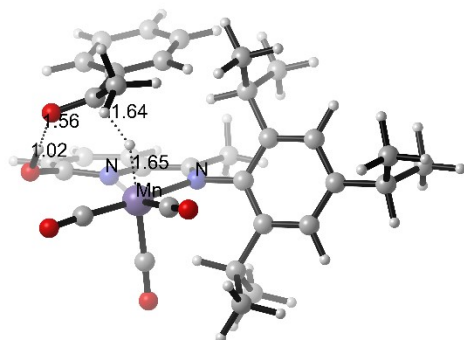

|    |         |          |          |
|----|---------|----------|----------|
| Mn | 4.67760 | 2.86270  | 2.80750  |
| O  | 1.79960 | 2.71550  | 1.10830  |
| C  | 4.80700 | 2.91690  | -0.37040 |
| H  | 5.15110 | 2.83070  | 1.23210  |
| O  | 3.67760 | 3.49590  | -0.47340 |
| H  | 2.54720 | 3.04220  | 0.49510  |
| O  | 3.76460 | 3.05380  | 5.63440  |
| O  | 7.00900 | 4.66310  | 3.04000  |
| N  | 3.32900 | 1.37880  | 2.23130  |
| N  | 5.73500 | 1.14020  | 3.17400  |
| C  | 1.58120 | -0.78840 | 1.97160  |
| H  | 0.89510 | -1.62520 | 1.88590  |
| C  | 2.88010 | -0.98410 | 2.45520  |
| H  | 3.22170 | -1.97290 | 2.73210  |
| C  | 3.72160 | 0.11560  | 2.57660  |
| C  | 5.10700 | 0.01050  | 3.06130  |
| C  | 4.12190 | 2.94830  | 4.53310  |
| C  | 6.09670 | 3.94250  | 3.00010  |
| C  | 3.70490 | 4.32770  | 2.40260  |
| O  | 3.15120 | 5.32800  | 2.19320  |
| C  | 2.12980 | 1.53020  | 1.64310  |
| C  | 1.20340 | 0.47560  | 1.55470  |
| H  | 0.23390 | 0.67270  | 1.11100  |
| C  | 6.03960 | 3.74460  | -0.68350 |
| H  | 5.91530 | 4.74890  | -0.27150 |
| H  | 6.96380 | 3.30860  | -0.30150 |
| H  | 6.11920 | 3.81980  | -1.77690 |
| C  | 5.67990 | -1.33440 | 3.38670  |
| H  | 6.64940 | -1.25060 | 3.87550  |
| H  | 5.00040 | -1.88230 | 4.04670  |
| H  | 5.79960 | -1.92410 | 2.47040  |
| C  | 7.10170 | 1.17940  | 3.59670  |
| C  | 8.11800 | 0.67910  | 2.77450  |
| C  | 7.43080 | 1.76830  | 4.82100  |

|   |          |          |          |
|---|----------|----------|----------|
| C | 9.45050  | 0.77500  | 3.17630  |
| C | 8.76790  | 1.84590  | 5.21670  |
| C | 9.80170  | 1.35960  | 4.40370  |
| H | 10.22380 | 0.38390  | 2.52080  |
| H | 9.00980  | 2.29890  | 6.17510  |
| C | 11.25250 | 1.46240  | 4.84330  |
| C | 12.07730 | 2.32800  | 3.87470  |
| C | 11.89010 | 0.07230  | 5.01400  |
| H | 11.25830 | 1.95670  | 5.82300  |
| H | 11.64150 | 3.32770  | 3.76550  |
| H | 13.10400 | 2.44260  | 4.24210  |
| H | 12.12650 | 1.86990  | 2.87970  |
| H | 11.32190 | -0.54130 | 5.72260  |
| H | 11.93020 | -0.46400 | 4.05830  |
| H | 12.91590 | 0.16430  | 5.39020  |
| C | 4.88060  | 1.42370  | -0.55780 |
| C | 6.05740  | 0.70320  | -0.30050 |
| C | 3.74130  | 0.72950  | -0.99190 |
| C | 6.08910  | -0.68230 | -0.45340 |
| H | 6.94190  | 1.22160  | 0.05080  |
| C | 3.77080  | -0.65850 | -1.14310 |
| H | 2.83330  | 1.28140  | -1.20910 |
| C | 4.94300  | -1.36980 | -0.87060 |
| H | 7.00370  | -1.22740 | -0.23690 |
| H | 2.87710  | -1.18320 | -1.46930 |
| H | 4.96450  | -2.45060 | -0.98040 |
| C | 7.75610  | 0.01920  | 1.43090  |
| C | 8.17370  | -1.42870 | 1.45370  |
| C | 8.41630  | 0.77460  | 0.30620  |
| H | 6.64100  | 0.08530  | 1.32220  |
| H | 7.67210  | -1.96590 | 2.29430  |
| H | 7.89620  | -1.93340 | 0.49670  |
| H | 9.27900  | -1.51750 | 1.58760  |
| H | 8.09140  | 1.84290  | 0.31050  |
| H | 9.52790  | 0.74330  | 0.41030  |
| H | 8.14510  | 0.32720  | -0.68070 |
| C | 6.31880  | 2.32390  | 5.73010  |
| C | 6.76510  | 3.63440  | 6.32600  |
| C | 5.98590  | 1.30970  | 6.79400  |
| H | 5.41900  | 2.49500  | 5.08150  |
| H | 7.00540  | 4.36780  | 5.51910  |
| H | 5.96150  | 4.06810  | 6.96920  |
| H | 7.67650  | 3.49060  | 6.95530  |
| H | 5.65860  | 0.34910  | 6.32820  |
| H | 6.87720  | 1.10520  | 7.43540  |
| H | 5.16210  | 1.68290  | 7.44940  |

### Mn1c-TS3-OUT-S

Gibbs free energy: -2916.30463883 Eh

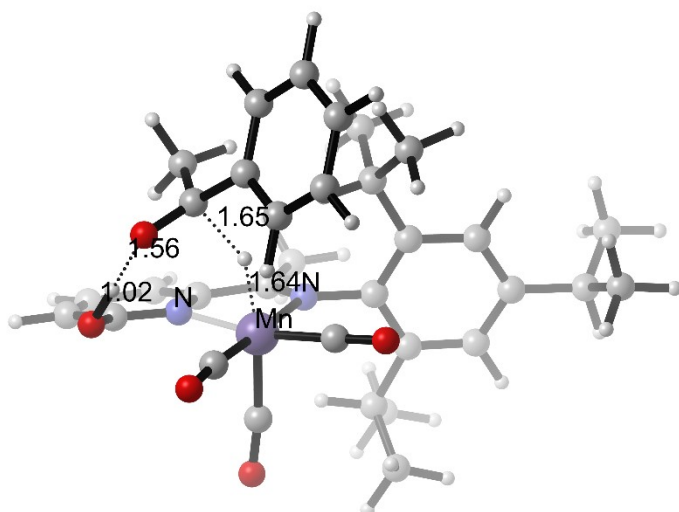

|    |          |          |          |
|----|----------|----------|----------|
| Mn | 4.69630  | 2.85850  | 2.80350  |
| O  | 1.83290  | 2.71610  | 1.09170  |
| C  | 4.82000  | 2.90480  | -0.37600 |
| H  | 5.17370  | 2.82760  | 1.23220  |
| O  | 3.71570  | 3.53240  | -0.47230 |
| H  | 2.57910  | 3.05380  | 0.48180  |
| O  | 3.27146  | 3.17853  | 5.39037  |
| O  | 7.03865  | 4.56352  | 3.40517  |
| N  | 3.34214  | 1.38307  | 2.24310  |
| N  | 5.71559  | 1.12845  | 3.28346  |
| C  | 1.54429  | -0.75187 | 2.06670  |
| H  | 0.83814  | -1.57437 | 2.01592  |
| C  | 2.83570  | -0.95547 | 2.56982  |
| H  | 3.15074  | -1.93662 | 2.90095  |
| C  | 3.70194  | 0.12717  | 2.64657  |
| C  | 5.06910  | 0.01114  | 3.17452  |
| C  | 3.90153  | 3.00437  | 4.42953  |
| C  | 6.11648  | 3.89201  | 3.18332  |
| C  | 3.78415  | 4.34133  | 2.34030  |
| O  | 3.24756  | 5.34890  | 2.12285  |
| C  | 2.14492  | 1.54103  | 1.65257  |
| C  | 1.19745  | 0.50205  | 1.59599  |
| H  | 0.23227  | 0.70503  | 1.14557  |
| C  | 5.61609  | -1.33611 | 3.53406  |
| H  | 6.65257  | -1.26691 | 3.85915  |
| H  | 5.02573  | -1.79180 | 4.33604  |
| H  | 5.55550  | -1.99982 | 2.66477  |
| C  | 7.01798  | 1.15526  | 3.89810  |
| C  | 8.16301  | 1.27780  | 3.08242  |
| C  | 7.12352  | 1.11495  | 5.30302  |
| C  | 9.41351  | 1.33925  | 3.70634  |
| C  | 8.40284  | 1.18722  | 5.87199  |
| C  | 9.55779  | 1.29698  | 5.09821  |
| H  | 10.30158 | 1.42039  | 3.08872  |
| H  | 8.49855  | 1.15964  | 6.95480  |
| C  | 10.92945 | 1.37767  | 5.74889  |
| C  | 11.61485 | 2.72179  | 5.45142  |
| C  | 11.82624 | 0.19923  | 5.33068  |
| H  | 10.77643 | 1.31252  | 6.83400  |

|   |          |          |          |
|---|----------|----------|----------|
| H | 10.99008 | 3.56560  | 5.76612  |
| H | 12.57251 | 2.79229  | 5.98089  |
| H | 11.81502 | 2.83171  | 4.37849  |
| H | 11.35352 | -0.76178 | 5.56521  |
| H | 12.03201 | 0.22145  | 4.25373  |
| H | 12.78729 | 0.24160  | 5.85734  |
| C | 8.06614  | 1.29272  | 1.56517  |
| C | 8.25153  | -0.12951 | 1.00360  |
| C | 9.05319  | 2.27011  | 0.91476  |
| H | 7.05571  | 1.60861  | 1.29270  |
| H | 7.49968  | -0.81598 | 1.40653  |
| H | 8.15502  | -0.13106 | -0.08920 |
| H | 9.24318  | -0.52362 | 1.25847  |
| H | 8.91860  | 3.28825  | 1.29454  |
| H | 10.09466 | 1.98141  | 1.08921  |
| H | 8.90285  | 2.28606  | -0.16619 |
| C | 5.91695  | 1.01635  | 6.22419  |
| C | 5.82817  | 2.25044  | 7.14088  |
| C | 5.94067  | -0.27534 | 7.06297  |
| H | 5.01391  | 0.98714  | 5.61086  |
| H | 5.85801  | 3.18095  | 6.56645  |
| H | 4.89781  | 2.23301  | 7.71764  |
| H | 6.66227  | 2.26695  | 7.85252  |
| H | 6.01089  | -1.16433 | 6.42685  |
| H | 6.79371  | -0.28352 | 7.75141  |
| H | 5.02532  | -0.35590 | 7.66121  |
| C | 6.06334  | 3.67819  | -0.75249 |
| C | 6.90658  | 3.20487  | -1.76709 |
| C | 6.33852  | 4.91952  | -0.16048 |
| C | 8.00852  | 3.96094  | -2.18123 |
| H | 6.69528  | 2.25427  | -2.24506 |
| C | 7.45371  | 5.65702  | -0.55012 |
| H | 5.68758  | 5.29451  | 0.62164  |
| C | 8.29428  | 5.18096  | -1.56515 |
| H | 8.64889  | 3.58829  | -2.97595 |
| H | 7.67407  | 6.60127  | -0.05953 |
| H | 9.16524  | 5.75610  | -1.86607 |
| C | 4.84713  | 1.40878  | -0.61894 |
| H | 4.71683  | 1.25128  | -1.69777 |
| H | 5.80149  | 0.97164  | -0.32180 |
| H | 4.02527  | 0.90670  | -0.11255 |

## 9. References

- 1 R. M. Khaled, A. Friedrich, M. A. Ragheb, N. T. Abdel-Ghani and A. M. Mansour, *Dalton Trans.*, 2020, **49**, 9294–9305.
- 2 A. Bruneau-Voisine, D. Wang, V. Dorcet, T. Roisnel, C. Darcel and J.-B. Sortais, *Org. Lett.*, 2017, **19**, 3656–3659.
- 3 Z. Wang, N. Ma, X. Lu, M. Liu, T. Liu, Q. Liu, G. A. Solan and W.-H. Sun, *Dalton Trans.*, 2023, **52**, 10574–10583.
- 4 J. Yu, J. Long, Y. Yang, W. Wu, P. Xue, L. W. Chung, X.-Q. Dong and X. Zhang, *Org. Lett.*, 2017, **19**, 690–693.
- 5 S. Chen, D. Yan, M. Xue, Y. Hong, Y. Yao and Q. Shen, *Org. Lett.*, 2017, **19**, 3382–3385.
- 6 S. Wang, H. Huang, S. Tsareva, C. Bruneau and C. Fischmeister, *Adv. Synth. Catal.*, 2019, **361**, 786–790.
- 7 T.-S. Chen, H. Long, Y. Gao and H.-C. Xu, *Angew. Chem. Int. Ed.*, 2023, **62**, e202310138.
- 8 L. Falivene, R. Credendino, A. Poater, A. Petta, L. Serra, R. Oliva, V. Scarano and L. Cavallo, *Organometallics*, 2016, **35**, 2286–2293.
- 9 O. V. Dolomanov, L. J. Bourhis, R. J. Gildea, J. A. K. Howard and H. Puschmann, *J. Appl. Crystallogr.*, 2009, **42**, 339–341.
- 10 S. Grimme, J. Antony, S. Ehrlich and H. Krieg, *J. Chem. Phys.*, 2010, **132**, 154104.
- 11 P. J. Stephens, F. J. Devlin, C. F. Chabalowski and M. J. Frisch, *J. Phys. Chem.*, 1994, **98**, 11623–11627.
- 12 F. Neese, *Wiley Interdiscip Rev Comput Mol Sci*, 2022, **12**, e1606.
- 13 F. Neese, F. Wennmohs, U. Becker and C. Riplinger, *J. Chem. Phys.*, 2020, **152**, 224108.
- 14 F. Weigend, *Phys. Chem. Chem. Phys.*, 2006, **8**, 1057–1065.
- 15 F. Weigend and R. Ahlrichs, *Phys. Chem. Chem. Phys.*, 2005, **7**, 3297–3305.
- 16 L. A. Curtiss, M. P. McGrath, J. Blaudeau, N. E. Davis, R. C. Binning Jr. and L. Radom, *J. Chem. Phys.*, 1995, **103**, 6104–6113.
- 17 T. Clark, J. Chandrasekhar, G. W. Spitznagel and P. V. R. Schleyer, *J. Comput. Chem.*, 1983, **4**, 294–301.
- 18 M. J. Frisch, J. A. Pople and J. S. Binkley, *J. Chem. Phys.*, 1984, **80**, 3265–3269.
- 19 W. J. Hehre, R. Ditchfield and J. A. Pople, *J. Chem. Phys.*, 1972, **56**, 2257–2261.
- 20 A. V. Marenich, C. J. Cramer and D. G. Truhlar, *J. Phys. Chem. B*, 2009, **113**, 6378–6396.
- 21 C. Y. Legault, CYLview20 Université de Sherbrooke 2020.
